# Supplementary material for: Differential Lipidomics, Metabolomics and Immunological Analysis of Alcoholic and Non-Alcoholic Steatohepatitis in Mice
Source: MDPI journal article supplement (doi:10.3390/ijms241210351), 2023-06-19
Supplement: s1 [file s1]

# Table S6

| Target           | Company          | Clone number   | Order number |
|------------------|------------------|----------------|--------------|
| Arginase 1       | Bioss            | BS             | bs-8585R     |
| CD3              | Miltenyi Biotec  | REAG1          | 130-109-838  |
| CD4              | Southern Biotech | L3T4           | 1540-02      |
| CD8              | BD Pharmingen    | 53-6.7         | 553030       |
| CD11b            | BioRad           | M1/70.15       | MCA74F       |
| CD11c            | Miltenyi Biotec  | N418           | 130-102-799  |
| CD27             | Miltenyi Biotec  | REA499         | 130-114-166  |
| CD29             | Miltenyi Biotec  | HM $\beta$ 1-1 | 130-102-557  |
| CD31             | BD Biosciences   | MEC13.3        | 553373       |
| CD40             | Biolegend        | HM40-3         | 102905       |
| CD41             | AbDSerotec       | MWReg30        | MCA2245F     |
| CD44             | Miltenyi Biotec  | REA664         | 130-119-121  |
| CD45             | Miltenyi Biotec  | 30F11.1        | 130-116-535  |
| CD54             | Biolegend        | YN1/1.7.4      | 116105       |
| CD80             | Biolegend        | 16-10A1        | 104706       |
| CD86             | Biolegend        | GL-1           | 105002       |
| CD127            | eBiosciences     | A7R34          | 11-1271-82   |
| CD206            | Biolegend        | C068C2         | 141708       |
| CXCR3            | R & D Systems    | 220803         | FAB1685P     |
| F4-80            | Biolegend        | BM8            | 123107       |
| IFN $\gamma$     | eBioscience      | XMG1.2         | 12-7311-41   |
| IL1b             | Thermo Fisher    | NJTEN3         | 11-7114-82   |
| IL-6             | eBioscience      | MP5-20F3       | 11-7061-82   |
| IL-10            | eBioscience      | JES5-16E3      | 11-7101-41   |
| Ki67             | eBioscience      | SoIA15         | 11-5698-80   |
| Ly6C             | eBioscience      | HK 1.4         | 17-5932-80   |
| Ly6G             | eBioscience      | RB6-8C5        | RM3005       |
| MHC II           | Miltenyi Biotec  | REA813         | 130-112-233  |
| Propidium Iodide | Sigma            |                | P4170        |
| Siglec F         | BD Bioscience    | E50-2440       | 552126       |
