# Supplementary material for: Differential Lipidomics, Metabolomics and Immunological Analysis of Alcoholic and Non-Alcoholic Steatohepatitis in Mice
Source: MDPI journal article supplement (doi:10.3390/ijms241210351), 2023-06-19
Supplement: s1 [file s1]

Figure S5

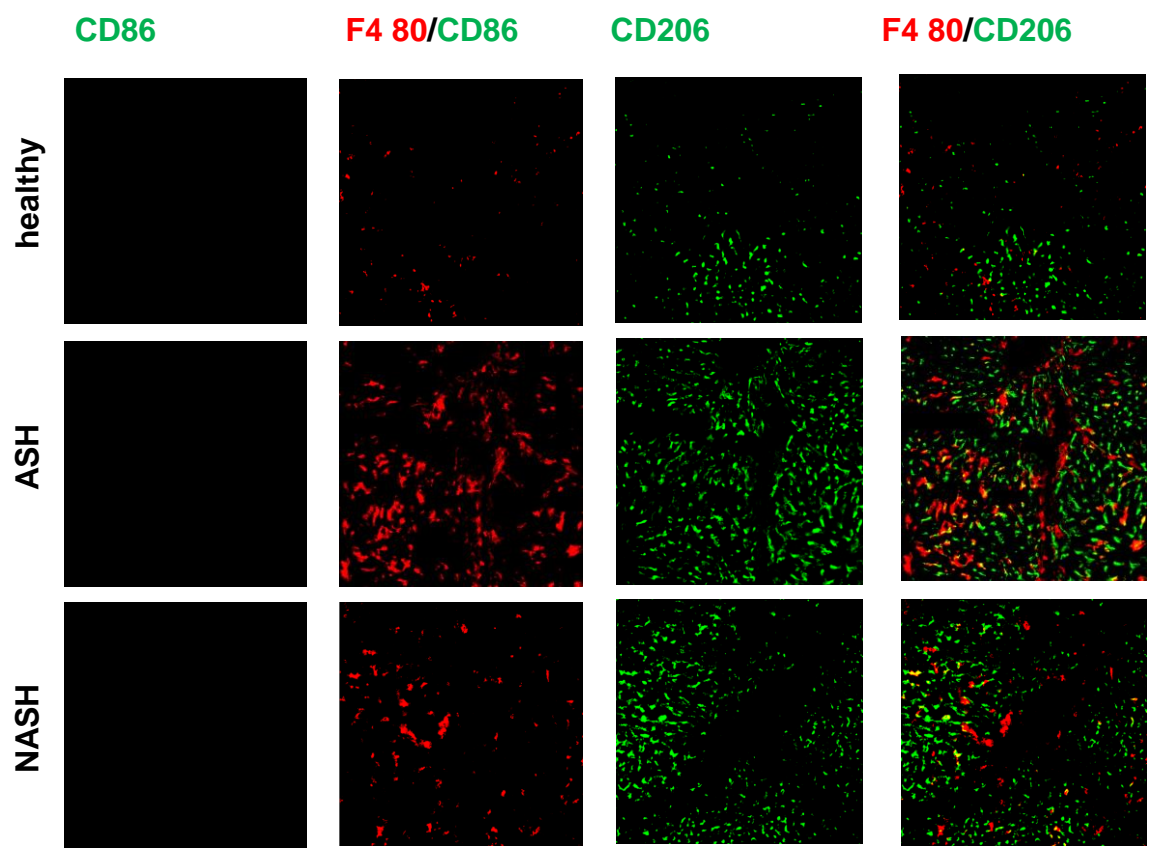

**Figure S5:** Representative images of M1- (F4 80<sup>+</sup>/CD86<sup>+</sup>) and M2-like macrophages (F4 80<sup>+</sup>/CD206<sup>+</sup>) in liver tissue 7 weeks after induction of ASH or NASH are shown.
