# Supplementary material for: Differential Lipidomics, Metabolomics and Immunological Analysis of Alcoholic and Non-Alcoholic Steatohepatitis in Mice
Source: MDPI journal article supplement (doi:10.3390/ijms241210351), 2023-06-19
Supplement: s1 [file s1]

Figure S1

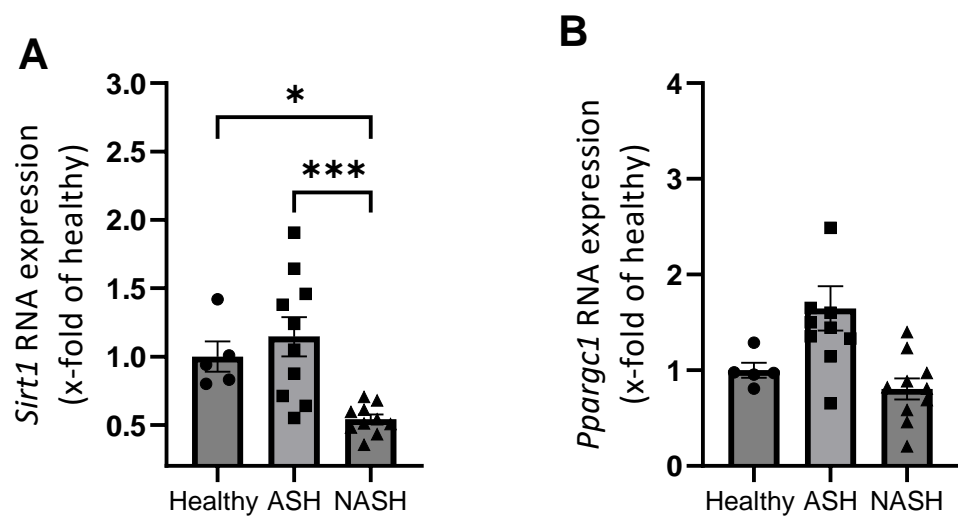

**Figure S1: Expression of PGC-1 $\alpha$  suggests a mild effect on mitochondrial functions in NASH (A,B)** mRNA expression levels of SIRT1 (panel A) and PGC1a (panel B) in livers from health mice or mice with ASH and NASH. Data are shown as mean  $\pm$  SEM, n = 4-10; One –way ANOVA Tukey post hoc test, \*p<0.05; \*\*\*p<0.001
