# Supplementary material for: Differential Lipidomics, Metabolomics and Immunological Analysis of Alcoholic and Non-Alcoholic Steatohepatitis in Mice
Source: Int J Mol Sci. 2023 Jun 19;24(12):10351. doi: 10.3390/ijms241210351 (PMC10299521; doi:10.3390/ijms241210351)
Supplement: Supplementary file 1 [file ijms-24-10351-s001.zip]

Archive with 7 entries (7 files):
- supplemental data/Supplemental  data S2 Lipidomics.xlsx
- supplemental data/Supplemental  data S4 Metabolomics.xlsx
- supplemental data/supplemental data S1.pdf
- supplemental data/supplemental data S3.pdf
- supplemental data/supplemental data S5.pdf
- supplemental data/supplemental data S6.pdf
- supplemental data/Supplementary Material_S7.xlsx
