# Supplementary material for: Differential Lipidomics, Metabolomics and Immunological Analysis of Alcoholic and Non-Alcoholic Steatohepatitis in Mice
Source: Int J Mol Sci. 2023 Jun 19;24(12):10351. doi: 10.3390/ijms241210351 (PMC10299521; doi:10.3390/ijms241210351)
Supplement: Supplementary file 1 [file ijms-24-10351-s001.zip › supplemental data/Supplemental data S2 Lipidomics.xlsx]

## Sheet: all
	FA.16.1	FA.18.1	FA.18.2	FA.20.2	FA.20.4	FA.22.6	LPC.O.16.0	LPC.O.16.1	LPC.O.18.0	LPC.O.18.1	LPE.16.0	LPE.16.1	LPE.17.0	LPE.18.0	LPE.18.1	LPE.18.2	LPE.20.0	LPE.20.1	LPE.20.2	LPE.20.3	LPE.20.4	LPE.20.5	LPE.22.3	LPE.22.4	LPE.22.5	LPE.22.6	LPE.O.16.1	LPE.O.18.1	LPE.O.18.2	LPE.O.20.1	LPG.16.0	LPG.18.0	LPG.18.1	LPG.18.2	LPI.16.0	LPI.18.0	LPI.18.1	LPI.18.2	LPI.20.3	LPI.20.4	LPS.18.0	LPS.18.1	LPS.20.4	LPS.22.6	NeuAcHex2Cer.34.1.2O	PC.34.1.O	PE.32.0	PE.32.1	PE.34.1
Control
Mouse 1	0.742	5.37	3.51	0.342	5.07	6.37	0.34	0.0838	0.135	0.123	11.8	0.524	0.25	7.84	5.62	2.07	0.12	0.319	0.0673	0.302	5.45	0.0773	0.00481	0.225	0.329	3.45	0.223	0.188	0.0573	0.0613	0.076	0.0158	0.498	0.297	1.16	4.69	1.31	1.32	2.09	8.22	2.25	0.205	0.706	1.06	0.0401	0.0135	0.27	1.93	19.7
Mouse 1	2.14	12.6	7.77	1.19	17	17.3	1.21	0.137	0.49	0.658	33.3	1.64	0.836	24.2	17.9	6.41	0.00494	1.08	0.324	1.39	24.3	0.337	0.125	2.27	1.89	12.8	0.824	0.582	0.265	0.168	0.401	0.103	1.47	0.796	4.78	21.5	4.26	2.63	4.7	26.9	8.26	0.792	4.7	4.64	0.138	0.059	0.675	4.21	55.1
Mouse 2	2.62	15.1	6.81	0.628	9.11	10	0.338	0.0647	0.141	0.13	11.8	0.48	0.263	8.08	6.09	2.33	0.102	0.307	0.0949	0.412	5.58	0.1	0.002405	0.14	0.367	3.86	0.216	0.194	0.0565	0.0691	0.105	0.0303	0.504	0.217	1.23	5.87	1.53	2.08	2.84	13.3	2.13	0.231	1.17	2.39	0.0634	0.00946	0.212	1.57	18.9
Mouse 2	1.19	7.97	3.38	0.369	5.57	8.11	0.378	0.0639	0.144	0.169	13.7	0.606	0.304	8.82	7.12	2.17	0.13	0.356	0.12	0.41	6.78	0.121	0.0163	0.417	0.442	3.81	0.264	0.22	0.0799	0.07	0.0955	0.0193	0.452	0.222	1.22	6.63	1.52	1.25	2.12	9.02	2.77	0.232	1.23	0.943	0.046	0.0108	0.223	1.76	20
Mouse 3	1.21	6.81	2.99	0.295	3.26	4.89	0.327	0.054	0.106	0.127	15.2	0.749	0.257	13.2	6.42	1.77	0.174	0.343	0.0652	0.282	4.76	0.0941	0.00849	0.171	0.33	3.29	0.202	0.152	0.0648	0.0514	0.0985	0.033	0.604	0.478	1.32	6.84	0.997	1.31	2.71	12.2	2.13	0.144	0.775	0.811	0.0343	0.0145	0.124	2.65	18.2
Mouse 3	1.04	5.6	3.7	1.02	3.07	3.75	0.31	0.0295	0.0727	0.125	13.4	0.688	0.21	10.1	5.66	1.57	0.157	0.306	0.0635	0.385	6.03	0.0801	0.0257	0.661	0.515	3.56	0.151	0.108	0.0315	0.0379	0.0926	0.0249	0.384	0.238	1.39	7.43	0.961	0.902	2.26	9.27	2.46	0.147	0.841	0.776	0.0273	0.0194	0.132	2.23	14.9
Mouse 4	0.757	4.22	1.42	0.0595	2.92	3.59	0.561	0.0551	0.158	0.273	17.2	0.961	0.257	12.3	8.25	1.73	0.154	0.432	0.0947	0.368	5.3	0.112	0.00663	0.259	0.462	3.34	0.449	0.274	0.125	0.0616	0.0822	0.029	0.727	0.419	1.98	7.05	1.71	1.52	5.22	18.2	2.35	0.228	1.05	0.938	0.0913	0.0151	0.174	2.92	16.9
Mouse 4	0.628	4.71	2.88	0.656	2.71	3.08	0.51	0.0506	0.15	0.309	12.9	0.7	0.172	9.22	6.24	1.5	0.112	0.333	0.0763	0.394	6.69	0.0936	0.0318	0.573	0.641	2.93	0.42	0.251	0.146	0.0664	0.101	0.0247	0.722	0.305	1.81	7.65	1.58	1.01	4.27	13.9	2.34	0.307	1.25	0.595	0.081	0.015	0.204	1.79	10.8
Mouse 5	1.6	5.69	2	0.0595	2.83	2.24	0.373	0.0544	0.119	0.165	11.3	0.785	0.14	5.91	5.38	1.53	0.0771	0.239	0.0757	0.384	4.91	0.117	0.00574	0.21	0.35	2.62	0.257	0.152	0.0889	0.0436	0.18	0.0315	0.588	0.131	1.05	5.47	0.734	0.235	0.947	2.99	2.08	0.258	1.21	0.853	0.0478	0.0121	0.369	5.22	34.7
Mouse 5	1.81	7.66	2.52	0.248	3.96	3.25	0.399	0.0762	0.104	0.167	11.9	0.904	0.161	7.25	6.17	1.66	0.0939	0.27	0.0762	0.414	6.77	0.142	0.0295	0.341	0.401	2.93	0.282	0.161	0.0982	0.0437	0.17	0.029	0.764	0.149	1.74	7.57	1.11	0.237	1.23	4.53	2.57	0.315	1.44	1.04	0.0587	0.0137	0.271	5.17	30.4
Mouse 6	0.511	2.04	1.77	0.562	1.83	1.42	0.22	0.00695	0.0941	0.106	6.64	0.53	0.133	5.67	5.14	0.968	0.0498	0.158	0.0528	0.194	3.48	0.036	0.00925	0.252	0.201	1.65	0.116	0.0736	0.0434	0.0273	0.114	0.0151	0.304	0.0825	2.18	15.6	1.38	0.208	0.501	3.46	2.56	0.187	1.21	0.651	0.035	0.0113	0.303	1.39	13.3
Mouse 6	0.938	4.95	2.14	0.0595	2.97	1.99	0.283	0.0236	0.103	0.135	9.14	0.604	0.191	7.64	6.61	1.37	0.0517	0.221	0.0714	0.285	4.78	0.0741	0.0136	0.459	0.375	2.56	0.153	0.115	0.0448	0.053	0.0942	0.0181	0.395	0.11	2.39	18.6	1.47	0.244	0.547	3.4	2.67	0.152	0.889	0.692	0.0419	0.0109	0.317	1.72	16.9
Mouse 7	1.68	6.83	3.24	0.337	5.64	3.9	0.367	0.0633	0.126	0.144	8.43	0.539	0.136	4.79	4.2	1.16	0.0717	0.162	0.0495	0.203	4.21	0.0785	0.00712	0.195	0.245	2.01	0.223	0.138	0.0758	0.0431	0.155	0.0141	0.459	0.111	0.963	3.59	0.667	0.312	0.601	3.37	2.84	0.242	1.09	0.718	0.0394	0.0109	0.373	2.72	23.1
Mouse 7	3.27	8.75	7.02	2.49	6.68	5.37	0.443	0.0734	0.159	0.188	11.6	0.781	0.194	6.9	6.68	2.23	0.0847	0.477	0.144	0.795	14.5	0.209	0.127	2.44	1.52	6.39	0.21	0.16	0.0816	0.0431	0.151	0.0289	0.517	0.175	1.14	4.79	0.715	0.279	0.696	3.56	3.31	0.314	1.13	0.826	0.0359	0.0255	0.375	2.93	26.3
Mouse 8	1.74	9.86	3.71	0.495	5.1	5.28	0.371	0.0701	0.121	0.162	8.97	0.62	0.139	5.56	5.06	1.42	0.0473	0.207	0.0597	0.238	4.58	0.0601	0.00614	0.183	0.257	2.5	0.211	0.138	0.0595	0.0495	0.106	0.0173	0.603	0.175	1.18	5.08	1.13	0.756	1.49	6.22	2.92	0.245	1.13	0.849	0.0502	0.0184	0.29	2.47	24.2
Mouse 8	1.42	7.91	5.07	0.884	4.64	5.44	0.309	0.0405	0.101	0.127	10.3	0.551	0.144	5.8	4.69	1.52	0.0604	0.225	0.0627	0.297	5.65	0.0741	0.0116	0.464	0.426	2.75	0.181	0.119	0.0629	0.0356	0.0978	0.0225	0.467	0.153	1.03	5.37	0.901	0.555	0.993	4.73	1.99	0.206	0.796	0.975	0.0312	0.0172	0.216	2.81	21.3
ASH
Mouse 1	0.373	4.52	1.46	0.546	1.75	2.27	0.294	0.0638	0.113	0.232	10.5	0.489	0.205	9.04	10.9	1.38	0.0249	0.545	0.13	0.536	4.39	0.0788	0.0457	0.358	0.398	2.07	0.218	0.157	0.113	0.0794	0.0782	0.0424	0.949	0.184	2.6	15.4	2.92	0.309	4.17	5.98	1.99	0.258	0.794	0.557	0.0684	0.0107	0.182	1.51	16.2
Mouse 1	0.551	4.91	1.54	0.332	2.32	2.57	0.376	0.106	0.117	0.237	9.86	0.474	0.211	8.53	11.3	1.28	0.0228	0.532	0.149	0.545	4.29	0.0622	0.049	0.39	0.381	2.09	0.262	0.164	0.123	0.0759	0.085	0.0606	1.14	0.215	3.01	18.3	3.65	0.398	5.5	6.89	3	0.306	0.978	0.479	0.0751	0.0113	0.199	1.88	18.7
Mouse 2	2.06	19	2.84	0.0595	3.68	4.45	0.33	0.0297	0.121	0.276	10.5	0.627	0.202	8.8	10.1	1.36	0.0149	0.408	0.0999	0.419	3.99	0.0686	0.0133	0.131	0.251	1.88	0.323	0.205	0.19	0.0966	0.128	0.039	1.14	0.244	1.6	7.49	1.62	0.264	3.27	5.07	3.31	0.437	1.08	0.72	0.0709	0.00736	0.189	2.65	21.3
Mouse 2	1.2	8.76	1.59	0.0595	2.88	3.22	0.285	0.0578	0.092	0.25	9.65	0.594	0.181	8.06	9.6	1.52	0.0162	0.387	0.113	0.522	4.9	0.0757	0.0346	0.243	0.359	2.3	0.315	0.213	0.174	0.0961	0.135	0.042	1.27	0.17	1.89	9.38	2.1	0.239	3.52	5.4	3.02	0.417	1.14	0.589	0.0756	0.00771	0.15	2.05	17
Mouse 3	11.3	13.7	4.99	0.879	2.66	2.46	0.311	0.0402	0.0998	0.234	11.9	0.631	0.211	8.53	12.4	1.66	0.0156	0.416	0.147	0.626	4.89	0.0799	0.0416	0.353	0.372	1.81	0.191	0.132	0.0899	0.0486	0.0889	0.0485	0.842	0.163	4.7	32.2	5.37	0.359	2.62	5.41	4.22	0.397	1.45	0.671	0.0586	0.0105	0.247	1.97	23.2
Mouse 3	0.437	4.23	1.97	0.263	3.65	2.87	0.303	0.0296	0.0999	0.228	10.8	0.592	0.197	9.18	13.5	1.64	0.0257	0.458	0.167	0.701	6.04	0.0709	0.0864	0.653	0.603	2.2	0.206	0.129	0.1	0.0479	0.115	0.0321	0.96	0.15	5.19	31.8	5.23	0.36	2.97	5.35	5.48	0.483	1.34	0.863	0.0604	0.00899	0.225	1.56	18.9
Mouse 4	0.891	5.15	2.35	0.782	2.14	2.69	0.366	0.0615	0.0962	0.227	7.57	0.399	0.121	5.66	5.93	1.14	0.0206	0.288	0.0899	0.534	4.92	0.0694	0.0722	0.503	0.569	2.29	0.345	0.179	0.156	0.0661	0.0826	0.0515	1.09	0.151	0.897	7.08	0.881	0.124	1.82	3.04	2.61	0.258	0.617	0.43	0.0849	0.0164	0.261	2.48	25.6
Mouse 4	0.688	4.3	2.09	0.477	1.71	2.05	0.293	0.0719	0.0773	0.181	7.46	0.395	0.108	5.54	5.17	1.18	0.0118	0.269	0.106	0.63	5.53	0.0711	0.106	0.683	0.63	2.71	0.276	0.156	0.14	0.06	0.0688	0.0346	0.781	0.128	0.855	6.46	0.766	0.111	1.74	2.79	1.95	0.194	0.588	0.382	0.0711	0.00921	0.224	1.97	21.5
Mouse 5	2.35	18.3	3.1	0.433	3.79	5.42	0.391	0.105	0.142	0.274	12	0.669	0.206	9.05	11.9	1.63	0.0129	0.446	0.165	0.73	5.74	0.0933	0.0607	0.366	0.577	2.88	0.531	0.26	0.275	0.0997	0.133	0.067	1.13	0.208	1.81	14.8	2.21	0.478	5.95	6.33	8.5	0.809	1.14	1.01	0.103	0.00915	0.307	2.49	23.9
Mouse 5	2.41	18.6	4.57	0.62	5.13	6.43	0.4	0.0637	0.14	0.3	11.1	0.622	0.169	8.51	10.7	1.44	0.0173	0.457	0.154	0.873	7.4	0.135	0.113	0.73	0.786	3.33	0.507	0.249	0.282	0.0855	0.0728	0.0444	1.08	0.202	1.75	12.3	1.88	0.308	4.62	6.31	5.16	0.543	1.42	0.917	0.106	0.00844	0.275	2.11	21.3
Mouse 6	1.28	14.9	3.11	0.487	4.22	4.23	0.579	0.141	0.153	0.44	11.5	0.608	0.199	9.29	11.3	1.8	0.0203	0.544	0.165	0.703	6.84	0.105	0.0699	0.607	0.612	2.81	0.72	0.388	0.357	0.121	0.0936	0.0628	1.18	0.249	1.88	12.4	2.31	0.559	5.55	7.6	3.62	0.449	1.14	0.806	0.172	0.0116	0.403	2.03	22.7
Mouse 6	1.01	10.7	3.51	0.55	4.37	4.44	0.545	0.144	0.136	0.513	11.5	0.599	0.223	9.83	12.2	1.65	0.00494	0.556	0.206	0.847	7.6	0.117	0.131	0.963	0.875	3.15	0.766	0.361	0.415	0.0936	0.0828	0.055	1.03	0.263	2.06	13.3	2.32	0.388	5.48	8.02	4.24	0.404	1.51	0.656	0.148	0.0145	0.419	2.03	23
Mouse 7	1.11	11.5	3.86	0.43	4.88	5.5	0.376	0.101	0.121	0.239	11.4	0.577	0.172	10.4	12.9	1.9	0.0375	0.612	0.175	0.744	6.54	0.102	0.0219	0.198	0.328	2.66	0.4	0.254	0.225	0.0874	0.101	0.0571	1.36	0.329	2.17	16.8	2.91	0.451	5.76	8.21	3.9	0.433	1.76	0.869	0.0706	0.0155	0.234	1.61	20.6
Mouse 7	2.02	18.7	5.9	1.36	7.35	7.28	0.403	0.0755	0.141	0.245	14.3	0.735	0.207	11.6	15.3	3.04	0.0388	1.42	0.304	1.8	16.2	0.224	0.269	1.94	1.43	6.55	0.359	0.211	0.178	0.0792	0.102	0.045	1.16	0.251	2.31	15.9	2.78	0.366	5.16	8.2	3.81	0.43	2.47	1.06	0.0611	0.0154	0.193	1.7	17.8
Mouse 8	1.1	12.7	5.44	0.0595	4.9	4.93	0.392	0.0897	0.097	0.283	9.97	0.452	0.121	6.49	6.27	1	0.0141	0.237	0.0689	0.385	4.28	0.0549	0.0221	0.266	0.387	1.99	0.381	0.2	0.195	0.0641	0.0959	0.0318	0.962	0.172	1.46	8.73	0.947	0.155	1.72	5.17	2.79	0.281	1.25	0.644	0.111	0.00957	0.359	3.04	22.3
Mouse 8	0.978	8.32	5.94	0.206	2.72	2.71	0.378	0.0737	0.0948	0.264	9.19	0.393	0.106	5.65	5.48	0.924	0.0107	0.226	0.074	0.404	4.41	0.0565	0.0564	0.523	0.549	1.98	0.372	0.229	0.2	0.0684	0.0683	0.0294	0.87	0.142	1.33	8.19	0.917	0.122	1.64	4.14	2.05	0.245	0.933	0.517	0.0728	0.00808	0.334	2.68	26.1
NASH
Mouse 1	11.9	79.8	6.79	2.35	5.88	4.09	0.327	0.0139	0.0963	0.133	10.2	0.825	0.103	8.56	7.77	0.899	0.027	0.29	0.0803	0.39	3.31	0.0838	0.0315	0.172	0.312	1.49	0.256	0.244	0.112	0.0373	0.111	0.0314	0.642	0.238	1.86	11.7	2.02	0.392	4.04	6.65	3.92	0.402	0.942	0.71	0.0726	0.00326	0.162	2.96	15.4
Mouse 1	2.41	13.8	3.7	0.414	2.68	2.2	0.414	0.102	0.185	0.2	11.4	1.08	0.12	9.22	8.86	1.43	0.0477	0.31	0.12	0.675	5.74	0.11	0.0907	0.624	0.64	2.4	0.361	0.322	0.161	0.0459	0.105	0.0494	0.655	0.234	2.57	14.9	2.51	0.388	5.42	7.11	4.79	0.442	0.808	0.652	0.0746	0.00555	0.329	4.02	21.1
Mouse 2	0.73	4.08	1.53	0.0595	1.97	2.3	0.479	0.0724	0.2	0.215	18.8	1.45	0.214	15.1	11.3	1.7	0.123	0.488	0.0088	0.651	5.16	0.13	0.0444	0.286	0.395	2.59	0.366	0.325	0.158	0.0554	0.14	0.0599	0.893	0.244	4.14	20.6	2.93	0.472	4.57	9.89	3.23	0.329	1.24	1.05	0.0883	0.0108	0.285	4.57	23
Mouse 2	0.62	2.04	1.09	0.0595	1.48	1.97	0.44	0.0705	0.196	0.214	15.2	1.31	0.17	11.9	9.01	1.66	0.0974	0.438	0.103	0.597	4.99	0.159	0.0662	0.295	0.413	2.66	0.361	0.31	0.161	0.0491	0.108	0.0517	0.609	0.158	3.26	15.1	2.31	0.425	3.48	7.93	2.89	0.232	1	0.7	0.0637	0.00625	0.224	4.52	21.4
Mouse 3	1.87	11	1.92	0.283	2.98	4.66	0.459	0.0974	0.161	0.185	16.1	1.36	0.168	13.2	12.4	1.7	0.00494	0.431	0.134	0.717	5.76	0.15	0.0176	0.254	0.459	2.88	0.306	0.255	0.162	0.0738	0.134	0.0635	1.1	0.285	3.62	23.3	4.45	0.656	9.35	12	4.36	0.451	1.42	1.54	0.098	0.00754	0.228	4.25	24
Mouse 3	1.69	7.97	1.86	0.354	3.19	3.69	0.435	0.0832	0.199	0.178	17.7	1.47	0.211	14.8	13.1	2.06	0.00494	0.502	0.148	1.01	7.8	0.235	0.105	0.498	0.686	3.32	0.351	0.311	0.161	0.0644	0.12	0.0649	1.12	0.328	2.8	18.5	3.14	0.615	7.73	11.1	3.3	0.333	1.58	0.983	0.0838	0.00961	0.206	4.15	21.6
Mouse 4	1.95	13.1	2.33	0.647	4.67	5.14	0.61	0.0825	0.291	0.255	11.7	0.881	0.145	10.5	8.07	1.1	0.069	0.344	0.104	0.438	5.1	0.0477	0.0509	0.345	0.504	1.96	0.406	0.401	0.196	0.065	0.0925	0.0638	1.03	0.392	3.88	21.3	4.4	0.553	6.63	10.7	3.09	0.295	0.781	0.575	0.124	0.00698	0.276	2.12	17.9
Mouse 4	2.32	15.4	2.66	0.435	6.19	7.78	0.584	0.0591	0.264	0.258	15	1.16	0.164	14.1	10.2	1.71	0.0813	0.462	0.141	0.695	8.36	0.0948	0.108	0.722	0.856	3.01	0.456	0.415	0.206	0.0763	0.126	0.082	1.26	0.469	4.45	26.2	4.94	0.566	7.05	13	6.27	0.539	1	0.846	0.103	0.00758	0.293	2.59	20.1
Mouse 5	3.53	22.4	3.23	0.945	8.63	7.91	0.708	0.0982	0.319	0.353	13.8	0.998	0.181	14.6	9.57	1.09	0.0785	0.385	0.099	0.388	4.48	0.0488	0.0409	0.282	0.575	1.86	0.658	0.698	0.291	0.0833	0.178	0.0856	1.12	0.447	3.23	20.2	3.81	0.787	9.68	14.1	10.4	0.86	1.34	0.935	0.163	0.00596	0.385	2.69	20.5
Mouse 5	2.55	21.1	6.74	3.33	6.12	6.06	0.461	0.0194	0.199	0.193	12.9	0.867	0.15	12	8.67	1.83	0.00494	0.431	0.175	1.46	15.6	0.125	0.52	3.22	2.57	3.81	0.41	0.385	0.157	0.0505	0.163	0.0765	1.16	0.426	2.41	19.1	3.02	0.478	5.92	12.4	8.02	0.67	1.23	0.156	0.105	0.0143	0.214	1.75	12.3
Mouse 6	1.81	10.3	2.29	0.0595	5.59	7.18	0.347	0.0406	0.191	0.222	11.3	0.906	0.14	13.5	9.07	1.22	0.12	0.426	0.0854	0.485	4.99	0.104	0.035	0.156	0.246	2.17	0.298	0.253	0.148	0.0445	0.113	0.0591	0.84	0.196	2.51	20.4	2.36	0.335	3.22	10.5	3.73	0.267	2.03	1.06	0.0841	0.00368	0.132	2.3	12.8
Mouse 6	2.6	19.4	3.2	0.47	6.27	8.69	0.318	0.0354	0.13	0.171	13	1.28	0.141	11.2	11.3	1.54	0.0886	0.759	0.121	0.718	6.62	0.123	0.055	0.265	0.433	3.48	0.204	0.21	0.0992	0.0482	0.151	0.0419	0.788	0.141	3.14	17.3	3.06	0.432	5.44	8.85	2.75	0.264	1.62	0.991	0.0676	0.00764	0.143	2.53	16.6
Mouse 7	1.73	10.4	1.94	0.167	3.99	4.12	0.377	0.047	0.158	0.169	12.1	0.858	0.132	10.5	8.21	1.02	0.0465	0.319	0.0799	0.482	4.33	0.0872	0.0325	0.191	0.352	1.97	0.257	0.236	0.113	0.0453	0.107	0.0544	1.01	0.219	2.12	15.5	2.11	0.583	7.05	13.5	3.12	0.288	1.25	0.854	0.0742	0.0057	0.197	2.49	14.6
Mouse 7	1.3	6.55	1.34	0.0595	2.72	2.62	0.323	0.0658	0.15	0.167	10.7	0.839	0.11	9.08	7.15	1.06	0.0558	0.268	0.0706	0.407	3.97	0.059	0.0267	0.155	0.365	1.96	0.212	0.209	0.0914	0.0441	0.102	0.0426	0.931	0.193	2.15	13.7	2.12	0.411	6.73	11.2	2.48	0.24	1.03	0.813	0.0722	0.00525	0.167	2.43	14.4
Mouse 8	1.65	7.78	2.31	0.309	4.45	6.56	0.38	0.0852	0.191	0.164	20.3	1.47	0.234	19.9	11.2	2.14	0.215	0.592	0.124	0.672	6.83	0.177	0.0253	0.235	0.508	3.86	0.246	0.216	0.109	0.0593	0.147	0.063	1.05	0.435	3.35	18.3	2.46	0.979	10	17.4	3.63	0.377	1.32	1.15	0.078	0.0108	0.181	3.61	20.1
Mouse 8	1.1	9.53	3.65	1.03	4.5	5.79	0.323	0.0358	0.171	0.114	23	1.63	0.295	22.5	13.1	3.1	0.252	0.782	0.207	1.65	15.1	0.313	0.321	1.92	1.57	6.23	0.269	0.243	0.1	0.051	0.138	0.0725	1.08	0.452	3.48	20.5	2.77	1.25	11	19.6	4.16	0.335	1.49	1.36	0.0605	0.016	0.179	3.28	18.1
[truncated: 343 more columns]
