# Supplementary material for: Differential Lipidomics, Metabolomics and Immunological Analysis of Alcoholic and Non-Alcoholic Steatohepatitis in Mice
Source: Int J Mol Sci. 2023 Jun 19;24(12):10351. doi: 10.3390/ijms241210351 (PMC10299521; doi:10.3390/ijms241210351)
Supplement: Supplementary file 1 [file ijms-24-10351-s001.zip › supplemental data/Supplemental data S4 Metabolomics.xlsx]

## Sheet: all
	4-Oxoproline	9-Methyluric acid	Adenosine 5'-monophosphate	Allantoin	Cholic acid	cis-Aconitic acid / trans-Aconitic acid	Citric acid	Cystathionine	Cystine	D-(-)-Lyxose	D-Mannose 6-phosphate	D-Ribose-1-phosphate	Fructose	Fucose	Gluconic acid	Glucose #1	Glucose #2	Glucose 1-phosphate	Glucuronic acid	Glucuronic acid-3,6-lactone	Glycerophospho-N-palmitoyl ethanolamine	Gly-Leu	Guanosine	Guanosine monophosphate (GMP)	Hippuric acid	Hydroxyphenyllactic acid	Indoxyl sulfate	Inosine-5'-monophosphate (IMP)	Itaconic acid	Kynurenic acid	Lactose*	L-Ascorbic acid 2-sulfate	L-Glutathione (reduced)	L-Saccharopine	Maleic acid	Malic acid	Mannitol / Iditol	N-Acetylaspartic acid	N-Acetyl-Asp-Glu	N-Acetyl-D-galactosamine 4-sulfate	N-Acetylglutamine	N-Acetylneuraminic acid	N-Acetylornithine	Orotic acid	Orotidine	Pantothenic acid	p-Cresol sulfate	Pseudouridine	S-Adenosylhomocysteine
control
Mouse 1	46200000	576000	977000000	78100000	243000	515000	6150000	76800	0	7700000	3370000000	217000000	71700000	9180000	1230000000	25700000	182000000	3370000000	446000000	14300000	10300000	1940000	17500000	120000000	53600000	4110000	9730000	23900000	7990000	0	6420000	18600000	1210000000	2220000	165000000	747000000	2860000	25300000	620000	2070000	43200000	2460000	290000	1420000	720000	5930000	22300000	3930000	1130000
Mouse 1	55800000	797000	784000000	103000000	317000	4380000	5580000	460000	0	8180000	922000000	204000000	187000000	7810000	1510000000	112000000	167000000	922000000	382000000	15300000	9100000	5680000	5130000	108000000	23000000	5040000	11200000	25000000	5290000	102000	1340000	35600000	910000000	2720000	158000000	788000000	2250000	28500000	671000	3200000	54200000	1550000	206000	1630000	1180000	7540000	40300000	4260000	1810000
Mouse 2	51800000	236000	1150000000	76700000	87100	7560000	8770000	768000	0	7890000	603000000	108000000	53800000	11700000	1430000000	23000000	174000000	603000000	472000000	11600000	7340000	3220000	22400000	155000000	11600000	5400000	9740000	20000000	8440000	0	4230000	21400000	1190000000	3140000	111000000	535000000	2590000	26500000	643000	2810000	52100000	4970000	538000	889000	770000	6230000	24600000	4510000	1060000
Mouse 2	51100000	445000	1100000000	89400000	36500	4870000	1540000	456000	7620	8830000	762000000	191000000	97000000	11700000	0	57200000	45700000	762000000	365000000	18600000	7730000	2340000	8080000	138000000	19500000	5290000	12400000	23000000	4770000	48000	5770000	23800000	1140000000	2350000	140000000	731000000	3140000	25500000	709000	1980000	56700000	3060000	421000	1640000	812000	6190000	26100000	4780000	1100000
Mouse 3	55800000	582000	1010000000	86100000	0	3510000	11500000	329000	0	10200000	2060000000	164000000	108000000	10300000	0	47800000	187000000	2060000000	482000000	21500000	9430000	1550000	11700000	118000000	12100000	2760000	3570000	37200000	17700000	0	7870000	23900000	1220000000	1090000	190000000	990000000	5130000	59000000	739000	2190000	70000000	2580000	366000	1330000	655000	5820000	15000000	4690000	1240000
Mouse 3	59400000	507000	1070000000	83500000	0	2850000	2950000	311000	0	10200000	1270000000	190000000	123000000	9390000	1160000000	39600000	156000000	1270000000	355000000	22900000	8300000	2640000	10900000	130000000	9470000	2900000	3650000	34500000	5130000	0	6990000	20100000	1160000000	1310000	144000000	808000000	3060000	43500000	816000	2130000	74200000	2970000	415000	1180000	722000	5840000	11100000	3930000	987000
Mouse 4	72200000	434000	923000000	109000000	0	1060000	11100000	273000	8390	9480000	2550000000	222000000	83800000	8250000	980000000	40900000	151000000	2550000000	378000000	118000000	10200000	1620000	9580000	112000000	11000000	3240000	3250000	59100000	16400000	0	5430000	26200000	891000000	1090000	152000000	777000000	4160000	61800000	602000	3210000	66200000	3020000	322000	1170000	929000	6510000	14200000	4990000	1320000
Mouse 4	75300000	370000	1030000000	116000000	0	826000	3030000	400000	0	10600000	2240000000	239000000	112000000	9260000	1050000000	34800000	164000000	2240000000	387000000	112000000	8640000	2610000	10600000	129000000	11300000	4350000	6040000	41300000	7350000	0	5100000	32700000	903000000	916000	121000000	570000000	2880000	43000000	696000	3140000	68500000	1740000	373000	1940000	1050000	6200000	16400000	4780000	881000
Mouse 5	54600000	459000	968000000	118000000	14700	1120000	4560000	206000	0	9660000	1230000000	185000000	103000000	13100000	1080000000	34500000	179000000	1230000000	259000000	0	6870000	3040000	17700000	121000000	8480000	2130000	4750000	47900000	7830000	78300	5260000	20000000	1080000000	715000	163000000	755000000	3590000	31400000	631000	2590000	114000000	1930000	504000	2240000	891000	3200000	25500000	3680000	1070000
Mouse 5	62500000	730000	919000000	126000000	12600	987000	0	250000	0	10400000	541000000	182000000	112000000	13500000	1070000000	29200000	162000000	541000000	239000000	15200000	6810000	3880000	15800000	122000000	7090000	3240000	5130000	50200000	6240000	44100	5670000	21900000	913000000	897000	69700000	550000000	3550000	20000000	564000	2270000	123000000	1090000	582000	2840000	743000	2910000	16800000	3880000	1080000
Mouse 6	45000000	577000	481000000	156000000	237000	233000	7510000	549000	0	10700000	2090000000	199000000	75000000	15000000	521000000	42100000	163000000	2090000000	31300000	0	4330000	2010000	14500000	65900000	1460000	4580000	1880000	38700000	5240000	62800	7200000	18400000	828000000	1010000	145000000	549000000	5180000	27500000	537000	1770000	103000000	1340000	239000	2560000	568000	2390000	17600000	4300000	2100000
Mouse 6	47900000	597000	589000000	144000000	380000	859000	4520000	2390000	0	10400000	494000000	173000000	113000000	15300000	665000000	28200000	176000000	494000000	42400000	0	4620000	3760000	8240000	85100000	1200000	0	1230000	45000000	3770000	51800	10600000	16600000	772000000	1960000	95800000	622000000	5280000	28900000	492000	2620000	105000000	1460000	409000	2270000	777000	2170000	22400000	4990000	9180000
Mouse 7	48700000	536000	889000000	101000000	76100	1150000	7610000	125000	0	8820000	2490000000	190000000	73700000	15000000	1230000000	25800000	189000000	2490000000	450000000	19600000	8880000	2470000	21400000	109000000	14900000	2850000	4870000	24300000	9860000	107000	8620000	27400000	1030000000	775000	127000000	670000000	3460000	46900000	856000	2430000	62000000	1520000	402000	2950000	774000	3740000	11900000	3950000	1050000
Mouse 7	43000000	666000	833000000	94000000	35400	532000	0	47800	0	9100000	2910000000	238000000	70500000	12900000	1020000000	21800000	183000000	2910000000	319000000	20000000	7840000	2300000	20500000	103000000	22900000	2870000	5350000	19700000	3670000	66500	6090000	24200000	1010000000	789000	130000000	604000000	3290000	77900000	1260000	2020000	70200000	930000	353000	1970000	741000	4200000	9880000	3600000	745000
Mouse 8	84400000	758000	980000000	112000000	73700	1340000	11700000	163000	0	8080000	2010000000	193000000	54300000	9140000	1040000000	21100000	149000000	2010000000	348000000	12200000	5820000	3480000	19200000	128000000	9030000	3170000	2510000	22900000	19500000	61800	4190000	25400000	1090000000	1010000	129000000	704000000	3400000	37700000	711000	3270000	56000000	3060000	375000	1520000	785000	4530000	31800000	3910000	1180000
Mouse 8	62700000	775000	1070000000	112000000	11300	1050000	3250000	142000	0	8880000	2040000000	252000000	57400000	9260000	1210000000	34800000	177000000	2040000000	302000000	12000000	7260000	3160000	17300000	150000000	7700000	3220000	3390000	25600000	6200000	66800	4430000	20500000	1140000000	958000	133000000	655000000	2490000	31100000	736000	2530000	67000000	1620000	476000	1100000	768000	4260000	26100000	3960000	1130000
ASH
Mouse 1	54800000	712000	787000000	147000000	1050000	688000	5320000	4330000	0	8420000	668000000	151000000	72300000	15400000	425000000	29400000	196000000	668000000	39600000	0	6860000	2320000	7690000	107000000	7350000	3140000	14200000	63700000	4740000	0	5100000	10100000	1350000000	430000	93800000	343000000	2090000	16400000	833000	1790000	103000000	2070000	687000	652000	671000	6410000	37300000	4360000	1330000
Mouse 1	50400000	509000	795000000	159000000	186000	647000	3130000	14600000	0	7380000	657000000	140000000	55500000	15100000	461000000	36500000	192000000	657000000	40900000	0	6060000	4400000	7250000	128000000	7390000	3220000	10400000	60700000	5350000	0	5130000	12200000	1210000000	1950000	65000000	337000000	2310000	17600000	1010000	3990000	94700000	1480000	643000	548000	1070000	5230000	44800000	5000000	5530000
Mouse 2	69800000	730000	745000000	127000000	28100	4250000	15700000	1150000	8550	8810000	657000000	113000000	68200000	14100000	1040000000	15600000	238000000	657000000	298000000	0	6040000	2160000	9280000	89300000	11200000	2650000	13400000	31800000	15500000	0	7570000	15000000	1270000000	640000	125000000	564000000	4320000	16900000	518000	2220000	114000000	3180000	515000	770000	879000	7550000	59600000	4290000	851000
Mouse 2	58900000	435000	851000000	116000000	15200	2390000	4340000	942000	7900	9430000	1060000000	154000000	277000000	13700000	979000000	20700000	166000000	1060000000	226000000	0	5770000	3780000	9610000	104000000	8710000	2770000	16300000	26700000	5720000	0	61500000	14400000	1300000000	734000	122000000	707000000	4090000	15000000	449000	2160000	131000000	1630000	508000	545000	949000	6920000	46900000	3840000	807000
Mouse 3	55600000	828000	550000000	145000000	1240000	419000	6000000	5790000	0	9720000	399000000	93600000	68000000	16200000	450000000	37900000	175000000	399000000	12300000	0	6260000	2650000	6020000	66800000	2840000	2560000	10300000	21700000	5060000	0	5040000	6350000	1090000000	814000	132000000	656000000	6980000	13900000	443000	1630000	98800000	2200000	667000	514000	661000	6160000	4310000	3240000	1620000
Mouse 3	50500000	792000	665000000	159000000	85000	983000	7240000	20300000	61700	9080000	518000000	96300000	52900000	18800000	525000000	52800000	263000000	518000000	14200000	0	5340000	2710000	2790000	93100000	2940000	0	8780000	23500000	0	0	5140000	8530000	1050000000	3200000	78300000	340000000	10400000	17500000	458000	2310000	95300000	3120000	667000	616000	1130000	4390000	3980000	4040000	6570000
Mouse 4	54500000	384000	949000000	87900000	66300	2970000	4470000	856000	0	9530000	1800000000	190000000	94600000	17000000	930000000	34000000	169000000	1800000000	361000000	13600000	5260000	2750000	11700000	116000000	6850000	3850000	6360000	27200000	7660000	0	5130000	12600000	1390000000	2110000	175000000	696000000	0	22800000	802000	2850000	109000000	2050000	446000	1690000	925000	5870000	35000000	3560000	708000
Mouse 4	58700000	337000	1010000000	75000000	20400	2200000	5170000	1870000	0	8290000	1330000000	168000000	99100000	14700000	909000000	52600000	138000000	1330000000	348000000	0	3780000	3230000	9460000	136000000	6020000	0	5430000	25200000	6480000	0	5480000	11200000	1290000000	6910000	134000000	677000000	0	18500000	719000	4290000	85500000	2070000	621000	988000	1130000	4970000	29100000	3330000	3050000
Mouse 5	37400000	674000	776000000	116000000	58900	1850000	3530000	830000	0	7730000	270000000	101000000	56100000	16400000	957000000	24400000	203000000	270000000	202000000	0	7020000	3080000	10900000	96000000	48800000	3810000	15000000	34500000	5880000	0	4330000	15300000	1120000000	594000	59500000	203000000	4270000	20000000	856000	2050000	85000000	2260000	844000	1060000	916000	5880000	34700000	3630000	681000
Mouse 5	63000000	729000	806000000	127000000	7920	850000	0	730000	0	8880000	732000000	145000000	61000000	16800000	776000000	30100000	184000000	732000000	188000000	13700000	5720000	5040000	11700000	96500000	38800000	4030000	17100000	33200000	4970000	0	5830000	14800000	1140000000	640000	66400000	207000000	2910000	19800000	1110000	1960000	94200000	2030000	790000	1310000	1070000	5750000	26000000	3790000	598000
Mouse 6	57800000	805000	754000000	103000000	52800	1450000	9120000	1050000	0	8390000	293000000	119000000	81400000	11500000	810000000	57000000	149000000	293000000	211000000	0	6390000	2540000	13800000	103000000	16800000	4010000	12100000	25900000	5540000	0	4370000	18000000	997000000	1250000	78300000	410000000	2310000	36500000	0	2970000	63200000	2460000	616000	530000	1210000	6360000	21700000	4270000	771000
Mouse 6	40400000	866000	825000000	119000000	23300	1420000	0	1030000	0	9330000	686000000	152000000	82800000	12500000	739000000	67300000	256000000	686000000	213000000	0	6520000	3990000	6010000	108000000	21200000	4090000	17200000	23600000	4170000	0	5420000	18000000	1100000000	870000	107000000	427000000	2580000	30200000	676000	2480000	83000000	2740000	555000	778000	1200000	8270000	22700000	4590000	555000
Mouse 7	44100000	523000	855000000	125000000	24900	686000	4920000	1090000	0	10100000	1340000000	120000000	62300000	14600000	1090000000	27500000	175000000	1340000000	245000000	0	9410000	3860000	12300000	112000000	7840000	3550000	4360000	20200000	7450000	0	4970000	12600000	1210000000	1060000	81400000	320000000	3370000	16800000	682000	2280000	133000000	2300000	480000	705000	724000	5900000	5520000	3300000	939000
Mouse 7	48300000	778000	916000000	130000000	65900	907000	1650000	1050000	0	10300000	1440000000	171000000	70300000	16400000	1090000000	35800000	168000000	1440000000	229000000	0	9830000	2660000	11100000	122000000	7290000	3940000	5100000	22700000	3020000	0	3760000	12700000	1240000000	1180000	80000000	295000000	2930000	21000000	817000	2060000	149000000	2070000	411000	588000	810000	6200000	5740000	3390000	755000
Mouse 8	41000000	602000	842000000	97800000	11700	3870000	11300000	568000	0	8970000	1110000000	163000000	88500000	18500000	902000000	32400000	176000000	1110000000	399000000	12700000	6630000	2450000	9770000	96000000	3120000	2920000	7020000	28200000	11300000	0	5700000	15100000	1180000000	1160000	127000000	600000000	2740000	23800000	535000	2920000	68300000	2500000	558000	1570000	872000	6050000	30800000	3830000	923000
Mouse 8	54100000	472000	940000000	88100000	0	2210000	2030000	642000	7160	8520000	870000000	178000000	69300000	20800000	832000000	20300000	174000000	870000000	382000000	15100000	5950000	3910000	10600000	113000000	3340000	3560000	7710000	27800000	5210000	0	7980000	11300000	1280000000	1150000	118000000	552000000	2290000	24000000	664000	2920000	77000000	1740000	681000	1300000	917000	6600000	24600000	3630000	744000
NASH
Mouse 1	48100000	1210000	794000000	128000000	216000	340000	3070000	750000	0	11800000	391000000	203000000	65800000	6120000	724000000	31700000	220000000	391000000	166000000	0	8470000	2460000	10500000	96100000	1050000	2890000	4980000	66500000	4920000	0	40200000	15700000	799000000	1330000	152000000	612000000	4410000	25200000	663000	2170000	69000000	1250000	860000	952000	983000	5770000	6530000	3770000	2410000
Mouse 1	45500000	1060000	802000000	123000000	90700	498000	2420000	2880000	17200	9320000	547000000	197000000	92300000	4970000	749000000	38700000	159000000	547000000	144000000	12400000	7100000	3330000	8980000	115000000	717000	2130000	3500000	77700000	4670000	0	5490000	15900000	819000000	5320000	95300000	544000000	3460000	27300000	579000	4150000	59300000	1220000	759000	693000	1280000	4370000	5560000	3970000	9630000
Mouse 2	61200000	820000	776000000	110000000	101000	588000	2700000	341000	0	10100000	1590000000	199000000	84900000	6750000	1020000000	29600000	141000000	1590000000	155000000	0	12500000	3480000	10200000	98500000	1120000	4420000	5540000	38000000	5690000	74600	4950000	10700000	875000000	1080000	135000000	585000000	4420000	24000000	649000	2660000	53700000	1160000	751000	620000	885000	6370000	7050000	3930000	1190000
Mouse 2	64600000	839000	838000000	124000000	83300	780000	2170000	1200000	0	8560000	633000000	181000000	99900000	6700000	1070000000	45700000	152000000	633000000	163000000	14200000	7950000	2300000	7100000	114000000	1120000	3460000	4930000	34700000	3240000	97700	4960000	11700000	730000000	4510000	96000000	637000000	4170000	26800000	644000	3720000	44700000	1460000	685000	652000	1220000	4780000	6210000	3890000	4930000
Mouse 3	62100000	722000	886000000	141000000	69400	285000	3410000	280000	0	10800000	1280000000	189000000	103000000	6180000	909000000	40500000	124000000	1280000000	188000000	0	9430000	3210000	11600000	111000000	649000	4690000	4520000	65400000	8980000	0	4380000	19200000	914000000	1720000	135000000	582000000	4170000	21900000	713000	2520000	56900000	2630000	820000	589000	1110000	9120000	5550000	4860000	1390000
Mouse 3	57400000	719000	922000000	133000000	44900	360000	1720000	970000	48600	9440000	711000000	167000000	105000000	6540000	971000000	64400000	155000000	711000000	174000000	0	7770000	6450000	12000000	132000000	608000	3400000	4180000	60800000	5810000	51300	4720000	21000000	737000000	6170000	105000000	596000000	3500000	22100000	707000	3520000	52000000	2910000	938000	626000	1350000	6170000	5250000	5640000	4930000
Mouse 4	70300000	1100000	582000000	140000000	493000	0	9620000	524000	0	8040000	938000000	162000000	56800000	3790000	1090000000	25100000	156000000	938000000	158000000	0	8550000	3160000	12200000	87800000	1220000	4090000	4390000	79500000	5570000	63500	4540000	12200000	807000000	1840000	124000000	547000000	4410000	52900000	502000	1390000	33900000	3440000	751000	926000	990000	7760000	14000000	4760000	1300000
Mouse 4	66900000	1060000	513000000	152000000	40000	767000	0	390000	0	7370000	1140000000	180000000	46600000	4140000	804000000	26400000	166000000	1140000000	101000000	0	9910000	4160000	8480000	75700000	1510000	4760000	7590000	62400000	9410000	57700	4930000	12000000	835000000	1460000	125000000	491000000	3150000	41200000	477000	996000	36700000	1370000	539000	798000	892000	7900000	14700000	4390000	1100000
Mouse 5	42500000	682000	711000000	154000000	21600	3560000	8560000	1010000	10300	8270000	609000000	138000000	55800000	6050000	1190000000	32600000	173000000	609000000	199000000	0	10900000	4600000	8440000	101000000	1890000	4840000	3600000	77000000	6130000	68300	3500000	18000000	700000000	2150000	118000000	594000000	4960000	73100000	629000	1960000	43000000	2950000	621000	860000	1180000	9260000	5100000	5100000	1260000
Mouse 5	42200000	787000	741000000	149000000	105000	1170000	1380000	582000	0	9640000	1320000000	199000000	48900000	5880000	1060000000	26100000	197000000	1320000000	173000000	0	9320000	2490000	12500000	103000000	1270000	5450000	3390000	85700000	0	0	2970000	16100000	789000000	2030000	122000000	487000000	3510000	46700000	584000	1350000	54200000	2270000	875000	758000	1150000	9940000	2890000	5260000	1010000
Mouse 6	62100000	1340000	776000000	146000000	23700	1420000	7230000	247000	0	11400000	1700000000	207000000	80900000	6460000	1170000000	22900000	157000000	1700000000	161000000	0	8230000	2420000	9480000	103000000	1010000	3200000	2320000	45100000	8360000	85500	5390000	14700000	736000000	1770000	150000000	696000000	9030000	29900000	680000	2260000	82400000	2690000	772000	459000	674000	6300000	3480000	5050000	1660000
Mouse 6	52000000	1130000	956000000	133000000	296000	1910000	1710000	493000	0	11300000	466000000	186000000	81200000	6560000	952000000	27600000	153000000	466000000	134000000	0	8810000	5010000	9600000	135000000	1260000	3850000	3060000	40600000	4910000	56500	3700000	11700000	792000000	1600000	144000000	668000000	5910000	23300000	828000	2190000	84500000	2280000	1000000	457000	817000	6820000	2940000	4850000	1210000
Mouse 7	53400000	825000	830000000	102000000	52500	2990000	23000000	632000	0	9820000	486000000	152000000	106000000	5130000	904000000	40000000	182000000	486000000	228000000	0	7040000	2760000	7930000	107000000	952000	3560000	2860000	49600000	14000000	41900	4350000	15400000	691000000	1580000	154000000	682000000	6930000	26300000	578000	2340000	53900000	6680000	862000	567000	853000	8240000	1310000	4920000	1300000
Mouse 7	58900000	816000	1000000000	115000000	73500	2440000	3160000	657000	0	11200000	539000000	194000000	83200000	4950000	912000000	31000000	151000000	539000000	226000000	0	7900000	2860000	8300000	133000000	1070000	4360000	3000000	63000000	5610000	0	4040000	16200000	747000000	1810000	125000000	625000000	4050000	22500000	686000	2270000	58900000	2550000	737000	544000	961000	9210000	1610000	4750000	1240000
Mouse 8	49500000	574000	928000000	113000000	112000	773000	4890000	500000	7690	9120000	1920000000	178000000	76200000	6770000	1160000000	27500000	145000000	1920000000	327000000	18200000	16500000	3160000	10100000	125000000	963000	3850000	2560000	21200000	7140000	64900	4960000	18300000	692000000	2580000	134000000	684000000	3940000	22000000	719000	2110000	72200000	2370000	660000	743000	904000	10200000	2120000	5570000	1180000
Mouse 8	53600000	652000	979000000	110000000	45400	224000	0	407000	0	9370000	2370000000	222000000	66700000	6610000	991000000	33300000	15900000	2370000000	283000000	12900000	14200000	1830000	13300000	124000000	737000	3790000	2930000	23100000	2720000	0	4680000	16800000	752000000	2670000	144000000	668000000	2540000	23100000	729000	2110000	78200000	2870000	1050000	526000	846000	12400000	0	5610000	1270000
[truncated: 85 more columns]
