# Supplementary material for: Differential Lipidomics, Metabolomics and Immunological Analysis of Alcoholic and Non-Alcoholic Steatohepatitis in Mice
Source: Int J Mol Sci. 2023 Jun 19;24(12):10351. doi: 10.3390/ijms241210351 (PMC10299521; doi:10.3390/ijms241210351)
Supplement: Supplementary file 1 [file ijms-24-10351-s001.zip › supplemental data/Supplementary Material_S7.xlsx]

## Sheet: Tissue homogenization
Index	Sample Name	Group	Tissue Weight [mg]	Extraction Solution Added to Tissue [µL]	Initial Tissue Concentration [mg/µL]	Homogenate Volume Used for Screening of Oxylipins [µL]	Equivalent of Tissue Used for Screening of Oxylipins [mg]	Final Tissue Concentration After Dilution for Profiling of Lipids and Polar Metabolites [mg/µL]	Homogenate Volume Used for Profiling of Lipids and Polar Metabolites [20 µL]	Equivalent of Tissue Used for Profiling of Lipids and Polar Metabolites [mg]	Extraction Round
1	2-2_A	ASH	18.4	350	0.05	200	10	0.05	20	1	#1
2	3_A	Control	64.52	581	0.1	200	20	0.05	20	1	#1
3	7-31_A	NASH	37.14	334	0.1	200	20	0.05	20	1	#1
4	4_A	Control	102.69	924	0.1	200	20	0.05	20	1	#1
5	8_A	Control	112.95	1017	0.1	200	20	0.05	20	1	#1
6	2-15_A	ASH	52.72	474	0.1	200	20	0.05	20	1	#1
7	7-30_A	NASH	86.21	776	0.1	200	20	0.05	20	1	#1
8	7_A	Control	95.47	859	0.1	200	20	0.05	20	1	#2
9	2-7_A	ASH	18.32	348	0.05	200	10	0.05	20	1	#2
10	1_A	Control	82.95	747	0.1	200	20	0.05	20	1	#2
11	7-28_A	NASH	49.96	450	0.1	200	20	0.05	20	1	#2
12	7-32_A	NASH	53.79	484	0.1	200	20	0.05	20	1	#2
13	7-29_A	NASH	12.41	236	0.05	130	6.5	0.05	20	1	#2
14	5_A	Control	127.53	1148	0.1	200	20	0.05	20	1	#3
15	2_A	Control	20.22	384	0.05	200	10	0.05	20	1	#3
16	2-5_A	ASH	12.96	246	0.05	100	5	0.05	20	1	#3
17	2-6_A	ASH	50.19	452	0.1	200	20	0.05	20	1	#3
18	7-27_A	NASH	52.38	471	0.1	200	20	0.05	20	1	#3
19	2-3_A	ASH	37.54	338	0.1	200	20	0.05	20	1	#3
20	7-26_A	NASH	42.62	384	0.1	200	20	0.05	20	1	#4
21	7-25_A	NASH	48.61	437	0.1	200	20	0.05	20	1	#4
22	2-4_A	ASH	39.71	357	0.1	200	20	0.05	20	1	#4
23	6_A	Control	88.85	800	0.1	200	20	0.05	20	1	#4
24	2-1_A	ASH	24.49	220	0.1	100	10	0.05	20	1	#4
25	2-2_B	ASH	62.71	564	0.1	200	20	0.05	20	1	#5
26	3_B	Control	56.2	506	0.1	200	20	0.05	20	1	#5
27	7-31_B	NASH	25.27	227	0.1	80	8	0.05	20	1	#5
28	4_B	Control	70.37	633	0.1	200	20	0.05	20	1	#5
29	8_B	Control	88.81	799	0.1	200	20	0.05	20	1	#5
30	2-15_B	ASH	47.72	429	0.1	200	20	0.05	20	1	#5
31	7-30_B	NASH	55.04	495	0.1	200	20	0.05	20	1	#5
32	7_B	Control	94.44	850	0.1	200	20	0.05	20	1	#6
33	2-7_B	ASH	11.7	222	0.05	100	5	0.05	20	1	#6
34	1_B	Control	104.62	942	0.1	130	13	0.05	20	1	#6
35	7-28_B	NASH	52.58	473	0.1	200	20	0.05	20	1	#6
36	7-32_B	NASH	63.06	568	0.1	200	20	0.05	20	1	#6
37	7-29_B	NASH	19.17	364	0.05	200	10	0.05	20	1	#6
38	5_B	Control	157.5	1418	0.1	200	20	0.05	20	1	#7
39	2_B	Control	25.13	226	0.1	100	10	0.05	20	1	#7
40	2-5_B	ASH	19.15	364	0.05	200	10	0.05	20	1	#7
41	2-6_B	ASH	42.34	381	0.1	200	20	0.05	20	1	#7
42	7-27_B	NASH	43.58	392	0.1	200	20	0.05	20	1	#7
43	2-3_B	ASH	14.27	271	0.05	100	5	0.05	20	1	#7
44	7-26_B	NASH	33.86	305	0.1	200	20	0.05	20	1	#8
45	7-25_B	NASH	30.45	274	0.1	100	10	0.05	20	1	#8
46	2-4_B	ASH	35.78	322	0.1	200	20	0.05	20	1	#8
47	6_B	Control	142.94	1286	0.1	200	20	0.05	20	1	#8
48	2-1_B	ASH	14.73	280	0.05	130	6.5	0.05	20	1	#8

## Sheet: Extraction protocols
Extraction protocol - lipids and polar metabolites - Keep samples in ice water - 20 µL of tissue homogenate (1 mg of tissue material) were transferred into 1.5 mL tubes (Sarstedt, Nümbrecht, Germany) + 10 µL of internal standards solved in methanol + 65 µL of methanol + 250 µL of MTBE + 50 µL of 50 mM ammonium formate solution - Vortexing for 1 min - Centrifugation for 5 min at 18,213 x g and 4 °…	Extraction protocol - oxylipins - liver samples - Keep samples in ice water - 200 µL of tissue homogenate (20 mg of tissue material) were transferred into 1.5 mL tubes (Sarstedt, Nümbrecht, Germany) + 4.4 µL 10% formic acid + 20 µL of internal standards solved in methanol + 0.1% butylated hydroxytoluene (BHT) + 20 µL of methanol + 0.1% BHT - Vortexing for 30 s + 200 µL pre-cooled acetonitrile:met…	Extraction protocol - oxylipins - standards and QC samples - Keep samples in ice water - 200 µL of phosphate buffered saline (PBS) were transferred into 1.5 mL tubes (Sarstedt, Nümbrecht, Germany) + 4.4 µL 10% formic acid + 20 µL of internal standards solved in methanol + 0.1% butylated hydroxytoluene (BHT) + 20 µL of corresponding standard or QC working solution - Vortexing for 30 s + 200 µL pre…

## Sheet: Method parameters-Metabolomics
LC parameters
Solvents
A	Water + 0.1% formic acid
B	Acetonitrile + 0.1% formic acid
Rear Seal Wash	10% Isopropanol
Needle Wash	95% Acetonitrile
Gradient Elution
Time [min]	A [%]	B [%]	Flowrate [mL/min]
0	5	95	0.3
1.5	5	95	0.3
12	60	40	0.3
14	60	40	0.3
14.2	75	25	0.3
17	75	25	0.3
19	5	95	0.5
26	5	95	0.5
Injection Volume
Positive Ionization Mode	3 µL
Negative Ionization Mode	5 µL
Positive Ionization					Negative Ionization
MS parameters					MS parameters
Ion Source					Ion Source
Parameters	Value				Parameters	Value
Ion Source Type:	H-ESI				Ion Source Type:	H-ESI
Spray Voltage:	Static				Spray Voltage:	Static
Positive Ion (V):	3400				Positive Ion (V):	3400
Negative Ion (V):	3000				Negative Ion (V):	3000
Gas Mode:	Static				Gas Mode:	Static
Sheath Gas (Arb):	25				Sheath Gas (Arb):	25
Aux Gas (Arb):	7				Aux Gas (Arb):	7
Sweep Gas (Arb):	0				Sweep Gas (Arb):	0
Ion Transfer Tube Temp (°C):	320				Ion Transfer Tube Temp (°C):	320
Vaporizer Temp (°C):	180				Vaporizer Temp (°C):	180
MS Global Settings					MS Global Settings
Parameters	Value				Parameters	Value
Infusion Mode:	Liquid Chromatography				Infusion Mode:	Liquid Chromatography
Expected LC Peak Width (s):	6				Expected LC Peak Width (s):	6
Advanced Peak Determination:	TRUE				Advanced Peak Determination:	TRUE
Mild Trapping:	TRUE				Mild Trapping:	TRUE
Default Charge State:	1				Default Charge State:	1
Enable Xcalibur AcquireX method configurations:	TRUE				Enable Xcalibur AcquireX method configurations:	TRUE
Internal Mass Calibration:	RunStart EASY-IC™				Internal Mass Calibration:	RunStart EASY-IC™
Settings for Full Scan					Settings for Full Scan
Orbitrap Resolution:	120000				Orbitrap Resolution:	120000
Scan Range (m/z):	70-700				Scan Range (m/z):	59-590
RF Lens (%):	20				RF Lens (%):	30
AGC Target:	Custom				AGC Target:	Custom
Normalized AGC Target (%):	100				Normalized AGC Target (%):	100
Maximum Injection Time Mode:	Auto				Maximum Injection Time Mode:	Auto
Microscans:	1				Microscans:	1
Data Type:	Profile				Data Type:	Profile
Polarity:	Positive				Polarity:	Negative
Source Fragmentation:	Disabled				Source Fragmentation:	Disabled
Filters					Filters
Intensity					Intensity
Filter Type:	Intensity Threshold				Filter Type:	Intensity Threshold
Intensity Threshold:	5000				Intensity Threshold:	5000
Dynamic Exclusion					Dynamic Exclusion
Dynamic Exclusion Mode:	Custom				Dynamic Exclusion Mode:	Custom
Exclude after n times:	1				Exclude after n times:	1
Exclusion duration (s):	5				Exclusion duration (s):	5
Mass Tolerance:	ppm				Mass Tolerance:	ppm
Low	10				Low	10
High	10				High	10
Exclude isotopes:	TRUE				Exclude isotopes:	TRUE
Perform dependent scan on single charge state per precursor only:	FALSE				Perform dependent scan on single charge state per precursor only:	FALSE
Targeted Mass					Targeted Mass
Mass List					Mass List
Mass List Type:	m/z				Mass List Type:	m/z
Time Mode:	Start/End Time				Time Mode:	Start/End Time
Include Intensity Threshold:	TRUE				Include Intensity Threshold:	TRUE
Add Mass List Targets Determined by Xcalibur AcquireX:	TRUE				Add Mass List Targets Determined by Xcalibur AcquireX:	TRUE
Compound	m/z	t start (min)	t stop (min)	Intensity Threshold	Compound	m/z	t start (min)	t stop (min)	Intensity Threshold
MRFA (Placeholder)	524.265	0	26	0	MRFA (Placeholder)	524.265	0	26	0
Mass Tolerance:	ppm				Mass Tolerance:	ppm
Low:	10				Low:	10
High:	10				High:	10
Set Collision Energy per Compound:	FALSE				Set Collision Energy per Compound:	FALSE
Perform dependent scan on most intense ion if no targets are found:	TRUE				Perform dependent scan on most intense ion if no targets are found:	TRUE
Targeted Mass Exclusion					Targeted Mass Exclusion
Mass List					Mass List
Mass List Type:	m/z				Mass List Type:	m/z
Time Mode:	Start/End Time				Time Mode:	Start/End Time
Include Intensity Threshold:	TRUE				Include Intensity Threshold:	TRUE
Add Mass List Targets Determined by Xcalibur AcquireX:	TRUE				Add Mass List Targets Determined by Xcalibur AcquireX:	TRUE
Compound	m/z	t start (min)	t stop (min)	Intensity Threshold	Compound	m/z	t start (min)	t stop (min)	Intensity Threshold
MRFA (Placeholder)	524.265	0	26	1e+20	MRFA (Placeholder)	524.265	0	26	1e+20
Mass Tolerance:	ppm				Mass Tolerance:	ppm
Low:	10				Low:	10
High:	10				High:	10
Apex Detection					Apex Detection
Desired Apex Window (%):	30				Desired Apex Window (%):	30
Data Dependent					Data Dependent
Data Dependent Mode:	Cycle Time				Data Dependent Mode:	Cycle Time
Time between Master Scans (sec):	0.6				Time between Master Scans (sec):	0.6
Settings for ddMS2					Settings for ddMS2
Multiplex Ions:	FALSE				Multiplex Ions:	FALSE
Isolation Window (m/z):	1				Isolation Window (m/z):	1
Isolation Offset:	Off				Isolation Offset:	Off
Collision Energy Mode:	Stepped				Collision Energy Mode:	Stepped
Collision Energy Type:	Absolute				Collision Energy Type:	Absolute
HCD Collision Energies (V):	15,30,60				HCD Collision Energies (V):	15,30,60
Orbitrap Resolution:	15000				Orbitrap Resolution:	15000
Scan Range Mode:	Auto				Scan Range Mode:	Auto
AGC Target:	Custom				AGC Target:	Custom
Normalized AGC Target (%):	10				Normalized AGC Target (%):	10
Maximum Injection Time Mode:	Auto				Maximum Injection Time Mode:	Auto
Microscans:	1				Microscans:	1
Data Type:	Profile				Data Type:	Profile
Internal Standard
Isotopically labeled internal standard	Vendor	Category	Concentration of standard working solution [ng/mL]	Volume of working solution [µL]	Sample Volume [µL]	Concentration related to sample [ng/mL]
Cholic acid-2,2,4,4-d4	Cambridge Isotope Laboratories	A	500	10	20	250
D-Fructose-U13C6	Cambridge Isotope Laboratories	A	500	10	20	250
Glycine-d5	Sigma Aldrich	A	500	10	20	250
Hypoxanthine-13C5	Cambridge Isotope Laboratories	B	50	10	20	25
L-Carnitine-d9	Cambridge Isotope Laboratories	A	500	10	20	250
L-Isoleucine-d10	Cambridge Isotope Laboratories	A	500	10	20	250
L-Leucine-d10	Cambridge Isotope Laboratories	A	500	10	20	250
L-Lysine-d9	Cambridge Isotope Laboratories	A	500	10	20	250
Succinic acid-2,2,3,3-d4	Sigma-Aldrich	A	500	10	20	250
*Cambridge Isotopes Laboratories	Tewksbury, MA, USA
*Sigma Aldrich	St. Louis, MO, USA
LC-MS/MS Instrumentation and Analysis
Instrumentation
HPLC:	Vanquish Horizon (Thermo Fisher)
MS:	Orbitrap Exploris 480 (Thermo Fisher)
Mode	H-ESI - positive and negative electrospray ionization
Column	SeQuant ZIC-HILIC 2.1 x 100 mm 3.5 µm (Merck)
Pre-column	SeQuant ZIC-HILIC 2.1 x 20 mm Guard Kit (Merck)
Analysis
Data Acquisition	Xcalibur 4.4 (Thermo Fisher)
Data Evaluation	TraceFinder 5.1 (Thermo Fisher)
Method	Scan + ddMS2
Acceptance criteria
The following analytes were excluded from data evaluation:
- Analytes showing a mass error > 5 ppm
- Analytes showing an isotope score < 40 (10 ppm, 90% intensity)
- Analytes without identity confirmation via spectral library matching or reference substance measurements
- Analytes containing only missing values in QC samples and study samples
- Analytes containing > 10% missing values in QC samples and study samples
- Analytes showing > 30% area RSD in QC samples
Acquisition List
Compound Name	Compound Type	Compound Formula	m/z	Polarity	Adduct	Charge State	Retention Time
1,7-Dimethyluric acid	Target Compound	C7H8N4O3	197.067	Positive	M+H	1	4.45
1-Methylhistidine	Target Compound	C7H11N3O2	170.092	Positive	M+H	1	12.2
2,4-Diaminobutyric acid	Target Compound	C4H10N2O2	119.082	Positive	M+H	1	13
2-Aminobutyric acid	Target Compound	C4H9NO2	104.071	Positive	M+H	1	7.87
2-Phenylglycine	Target Compound	C8H9NO2	152.071	Positive	M+H	1	6.85
3-Indolepropionic acid	Target Compound	C11H11NO2	190.086	Positive	M+H	1	6.51
3-Methylhistidine	Target Compound	C7H11N3O2	170.092	Positive	M+H	1	12.4
4-Acetamidobutanoic acid	Target Compound	C6H11NO3	146.081	Positive	M+H	1	2.12
4-Guanidinobutanoic acid	Target Compound	C5H11N3O2	146.092	Positive	M+H	1	7.19
4-Hydroxybenzaldehyde	Target Compound	C7H6O2	123.044	Positive	M+H	1	7.67
4-Hydroxyproline #1	Target Compound	C5H9NO3	132.065	Positive	M+H	1	8.24
4-Hydroxyproline #2	Target Compound	C5H9NO3	132.065	Positive	M+H	1	8.44
5-Hydroxylysine	Target Compound	C6H14N2O3	163.108	Positive	M+H	1	12.92
7,8-Dihydroneopterin	Target Compound	C9H13N5O4	256.104	Positive	M+H	1	7.93
7-Methylguanosine	Target Compound	C11H15N5O5	298.115	Positive	M+H	1	5.75
7-Methylxanthine	Target Compound	C6H6N4O2	167.056	Positive	M+H	1	3.03
Acetylcholine	Target Compound	C7H16NO2	147.125	Positive	M+H	1	6.55
Adenosine	Target Compound	C10H13N5O4	268.104	Positive	M+H	1	6.78
Alanine	Target Compound	C3H7NO2	90.055	Positive	M+H	1	8.46
alpha-Aminoadipic acid	Target Compound	C6H11NO4	162.076	Positive	M+H	1	8.1
alpha-N-Phenylacetylglutamine	Target Compound	C13H16N2O4	265.118	Positive	M+H	1	2.8
Aminocaprylic acid	Target Compound	C8H17NO2	160.133	Positive	M+H	1	5.83
Anserine	Target Compound	C10H16N4O3	241.13	Positive	M+H	1	13.25
Arginine	Target Compound	C6H14N4O2	175.119	Positive	M+H	1	12.4
Asparagine	Target Compound	C4H8N2O3	133.061	Positive	M+H	1	9.01
Aspartic acid	Target Compound	C4H7NO4	134.045	Positive	M+H	1	8.6
Betaine	Target Compound	C5H11NO2	118.086	Positive	M+H	1	7.34
Bilirubin	Target Compound	C33H36N4O6	585.271	Positive	M+H	1	4.14
CAR 10:0	Target Compound	C17H33NO4	316.248	Positive	M+H	1	2.41
CAR 10:1	Target Compound	C17H31NO4	314.233	Positive	M+H	1	2.42
CAR 10:2	Target Compound	C17H29NO4	312.217	Positive	M+H	1	2.5
CAR 12:0	Target Compound	C19H37NO4	344.279	Positive	M+H	1	2.35
CAR 12:1	Target Compound	C19H35NO4	342.264	Positive	M+H	1	2.8
CAR 14:0	Target Compound	C21H41NO4	372.311	Positive	M+H	1	2.25
CAR 14:1	Target Compound	C21H39NO4	370.295	Positive	M+H	1	2.31
CAR 14:1;OH	Target Compound	C21H39NO5	386.29	Positive	M+H	1	2.94
CAR 14:2	Target Compound	C21H37NO4	368.279	Positive	M+H	1	2.28
CAR 14:2;OH	Target Compound	C21H37NO5	384.274	Positive	M+H	1	2.8
CAR 16:0	Target Compound	C23H45NO4	400.342	Positive	M+H	1	2.2
CAR 16:0;OH	Target Compound	C23H45NO5	416.337	Positive	M+H	1	2.93
CAR 16:1	Target Compound	C23H43NO4	398.327	Positive	M+H	1	2.2
CAR 16:1;OH	Target Compound	C23H43NO5	414.321	Positive	M+H	1	2.8
CAR 16:2	Target Compound	C23H41NO4	396.311	Positive	M+H	1	2.2
CAR 16:2;OH	Target Compound	C23H41NO5	412.306	Positive	M+H	1	2.85
CAR 18:0	Target Compound	C25H49NO4	428.373	Positive	M+H	1	2.2
CAR 18:1	Target Compound	C25H47NO4	426.358	Positive	M+H	1	2.15
CAR 18:1;OH	Target Compound	C25H47NO5	442.353	Positive	M+H	1	2.65
CAR 18:2	Target Compound	C25H45NO4	424.342	Positive	M+H	1	2.2
CAR 2:0	Target Compound	C9H17NO4	204.123	Positive	M+H	1	4.48
CAR 3:0	Target Compound	C10H19NO4	218.139	Positive	M+H	1	3.7
CAR 3:0;OH	Target Compound	C10H19NO5	234.134	Positive	M+H	1	4
CAR 3:1	Target Compound	C10H17NO4	216.123	Positive	M+H	1	4.3
CAR 4:0	Target Compound	C11H21NO4	232.154	Positive	M+H	1	3.22
CAR 4:1	Target Compound	C11H19NO4	230.139	Positive	M+H	1	3.9
CAR 5:0	Target Compound	C12H23NO4	246.17	Positive	M+H	1	3
CAR 5:1	Target Compound	C12H21NO4	244.154	Positive	M+H	1	3.1
CAR 6:0	Target Compound	C13H25NO4	260.186	Positive	M+H	1	2.82
CAR 6:1	Target Compound	C13H23NO4	258.17	Positive	M+H	1	2.92
CAR 8:0	Target Compound	C15H29NO4	288.217	Positive	M+H	1	2.53
CAR 9:0	Target Compound	C16H31NO4	302.233	Positive	M+H	1	2.45
CAR DC12:0	Target Compound	C19H35NO6	374.254	Positive	M+H	1	0.2
CAR DC3:0	Target Compound	C10H17NO6	248.113	Positive	M+H	1	0.33
CAR DC3:0;2Me	Target Compound	C11H19NO6	262.129	Positive	M+H	1	6.32
CAR DC5:0	Target Compound	C12H21NO6	276.144	Positive	M+H	1	5.75
CAR DC5:0;3Me	Target Compound	C13H23NO6	290.16	Positive	M+H	1	5.04
CAR DC5:1	Target Compound	C12H19NO6	274.129	Positive	M+H	1	6.06
CAR DC7:0	Target Compound	C14H25NO6	304.175	Positive	M+H	1	5
Carnitine	Target Compound	C7H15NO3	162.112	Positive	M+H	1	7.43
Carnitine-d9	Internal Standard	C7H15NO3	171.169	Positive	M+H	1	7.36
Carnosine	Target Compound	C9H14N4O3	227.114	Positive	M+H	1	2.2
Choline	Target Compound	C5H14NO	104.107	Positive	M+	1	7.3
Citrulline	Target Compound	C6H13N3O3	176.103	Positive	M+H	1	9.3
Creatine	Target Compound	C4H9N3O2	132.077	Positive	M+H	1	8.2
Creatinine	Target Compound	C4H7N3O	114.066	Positive	M+H	1	7.8
Cysteine-S-sulfate	Target Compound	C3H7NO5S2	201.984	Positive	M+H	1	7.74
Cystine	Target Compound	C6H12N2O4S2	241.031	Positive	M+H	1	10.71
Cytidine	Target Compound	C9H13N3O5	244.093	Positive	M+H	1	9.15
Dimethylarginine	Target Compound	C8H18N4O2	203.15	Positive	M+H	1	11.5
DOPA	Target Compound	C9H11NO4	215.103	Positive	M+H	1	3.3
Dopamine	Target Compound	C8H11NO2	154.086	Positive	M+H	1	8.58
Ergothioneine	Target Compound	C9H15N3O2S	230.096	Positive	M+H	1	8.71
Glutamic acid	Target Compound	C5H9NO4	148.06	Positive	M+H	1	8.48
Glutamine	Target Compound	C5H10N2O3	147.076	Positive	M+H	1	8.84
Glycine	Target Compound	C2H5NO2	76.0393	Positive	M+H	1	8.95
Glycine-d2	Internal Standard	C2H5NO2	78.0519	Positive	M+H	1	8.95
Guanidinosuccinic acid	Target Compound	C5H9N3O4	176.067	Positive	M+H	1	8.88
Guanine	Target Compound	C5H5N5O	152.057	Positive	M+H	1	6.4
Hippuric acid	Target Compound	C9H9NO3	180.065	Positive	M+H	1	1.81
Histamine	Target Compound	C5H9N3	112.087	Positive	M+H	1	12
Histidine	Target Compound	C6H9N3O2	156.077	Positive	M+H	1	11.95
Homoarginine	Target Compound	C7H16N4O2	189.135	Positive	M+H	1	12.25
Homocysteic acid	Target Compound	C4H9NO5S	184.028	Positive	M+H	1	16.42
Homocysteine	Target Compound	C4H9NO2S	136.043	Positive	M+H	1	7.25
Homoserine	Target Compound	C4H9NO3	120.066	Positive	M+H	1	8.55
Hypotaurine	Target Compound	C2H7NO2S	110.027	Positive	M+H	1	8.41
Hypoxanthine	Target Compound	C5H4N4O	137.046	Positive	M+H	1	5.13
Hypoxanthine-13C5	Internal Standard	C5H4N4O	142.063	Positive	M+H	1	5.14
Iditol* (C6 Sugar alcohol)	Target Compound	C6H14O6	183.086	Positive	M+H	1	7.05
Indole-3-lactic acid	Target Compound	C11H11NO3	206.081	Positive	M+H	1	2.17
Indoleacrylic acid	Target Compound	C11H9NO2	188.071	Positive	M+H	1	6.75
Inosine	Target Compound	C10H12N4O5	269.088	Positive	M+H	1	5.8
Isoleucine	Target Compound	C6H13NO2	132.102	Positive	M+H	1	6.9
Isoleucine-d10	Internal Standard	C6H3NO2D10	142.165	Positive	M+H	1	6.9
Kynurenic acid	Target Compound	C10H7NO3	190.05	Positive	M+H	1	3.59
Kynurenine	Target Compound	C10H12N2O3	209.092	Positive	M+H	1	6.63
L-Cystathionine	Target Compound	C7H14N2O4S	223.075	Positive	M+H	1	7.79
Lactose*	Target Compound	C12H22O11	343.123	Positive	M+H	1	10.91
Leu-Pro	Target Compound	C11H20N2O3	229.155	Positive	M+H	1	6.7
Leucine	Target Compound	C6H13NO2	132.102	Positive	M+H	1	6.7
Leucine-d10	Internal Standard	C6H3NO2D10	142.165	Positive	M+H	1	5.6
Lysine	Target Compound	C6H14N2O2	147.113	Positive	M+H	1	12.5
Lysine-d9	Internal Standard	C6H14N2O2	156.169	Positive	M+H	1	12.5
Methionine	Target Compound	C5H11NO2S	150.058	Positive	M+H	1	6.92
Methionine sulfoxide	Target Compound	C5H11NO3S	166.053	Positive	M+H	1	8.78
Methylhistamine	Target Compound	C6H11N3	126.103	Positive	M+H	1	15.67
Methylimidazoleacetic acid	Target Compound	C6H8N2O2	141.066	Positive	M+H	1	7.01
N-Acetyl-DL-tryptophan	Target Compound	C13H14N2O3	247.108	Positive	M+H	1	4.64
N-Acetyl-L-carnosine	Target Compound	C11H16N4O4	269.124	Positive	M+H	1	12.91
N-Acetylarginine	Target Compound	C8H16N4O3	217.13	Positive	M+H	1	8.2
N-Acetylcarnosine	Target Compound	C11H16N4O4	269.125	Positive	M+H	1	7.81
N-Acetyldopamine	Target Compound	C10H13NO3	196.097	Positive	M+H	1	8.42
N-Acetylornithine	Target Compound	C7H14N2O3	175.108	Positive	M+H	1	8.61
N-Acetylserine	Target Compound	C5H9NO4	148.06	Positive	M+H	1	2.08
N-Arachidonoyl-L-Serine	Target Compound	C23H37NO4	392.28	Positive	M+H	1	6.33
N4-Acetylcytidine	Target Compound	C11 H15 N3 O6	286.103	Positive	M+H	1	8.61
N6,N6,N6-Trimethyl-L-lysine	Target Compound	C9H20N2O2	189.16	Positive	M+H	1	8.5
N6-Acetyllysine	Target Compound	C8H16N2O3	189.123	Positive	M+H	1	4.14
N6-Me-Adenosine	Target Compound	C11 H15 N5 O4	282.12	Positive	M+H	1	2.47
Neopterin	Target Compound	C9H11N5O4	254.088	Positive	M+H	1	7.64
Niacinamide	Target Compound	C6H6N2O	123.055	Positive	M+H	1	2.9
Nicotine	Target Compound	C10H14N2	163.123	Positive	M+H	1	8.9
Nitrotyrosine	Target Compound	C9H10N2O5	227.066	Positive	M+H	1	6.62
Ornithine	Target Compound	C5H12N2O2	133.097	Positive	M+H	1	12.68
Pantothenic acid	Target Compound	C9H17NO5	220.118	Positive	M+H	1	2.39
Paraxanthine/Theobromine/Theophylline	Target Compound	C7H8N4O2	181.072	Positive	M+H	1	1.9
Phenylalanine	Target Compound	C9H11NO2	166.086	Positive	M+H	1	6.5
Phenylalanine betaine	Target Compound	C12H17NO2	208.133	Positive	M+H	1	5.53
Phenylethylamine	Target Compound	C8H11N	122.097	Positive	M+H	1	0.2
Pipecolic acid	Target Compound	C6H11NO2	130.086	Positive	M+H	1	6.88
Proline	Target Compound	C5H9NO2	116.071	Positive	M+H	1	7.83
Proline betaine	Target Compound	C7H13NO2	144.102	Positive	M+H	1	7.21
Putrescine	Target Compound	C4H12N2	89.1073	Positive	M+H	1	15.83
Pyroglutamic acid	Target Compound	C5H7NO3	130.05	Positive	M+H	1	8.84
Serine	Target Compound	C3H7NO3	106.05	Positive	M+H	1	9.03
Serotonin	Target Compound	C10H12N2O	177.102	Positive	M+H	1	7.31
Sphingosine	Target Compound	C18H37NO2	300.29	Positive	M+H	1	4.42
Taurine	Target Compound	C2H7NO3S	126.022	Positive	M+H	1	8.01
Threonine	Target Compound	C4H9NO3	120.066	Positive	M+H	1	8.55
Thymidine	Target Compound	C10H14N2O5	243.098	Positive	M+H	1	7.21
trans-3-Hydroxycotinine	Target Compound	C10H12N2O2	193.097	Positive	M+H	1	6.3
Trigonelline	Target Compound	C7H7NO2	138.055	Positive	M+H	1	7.26
Trimethylamine N-oxide	Target Compound	C3H9NO	76.0757	Positive	M+H	1	6.6
Tryptophan	Target Compound	C11H12N2O2	205.097	Positive	M+H	1	6.9
Tyrosine	Target Compound	C9H11NO3	182.081	Positive	M+H	1	7.66
Uracil	Target Compound	C4H4N2O2	113.035	Positive	M+H	1	5.04
Uric acid	Target Compound	C5H4N4O3	169.036	Positive	M+H	1	6.46
Uridine	Target Compound	C9H12N2O6	245.077	Positive	M+H	1	5.04
Urocanic acid	Target Compound	C6H6N2O2	139.05	Positive	M+H	1	7.26
Val-Phe	Target Compound	C14H20N2O3	265.155	Positive	M+H	1	6.2
Val-Pro	Target Compound	C10H18N2O3	215.139	Positive	M+H	1	6.13
Valine	Target Compound	C5H11NO2	118.086	Positive	M+H	1	7.01
Xanthine	Target Compound	C5H4N4O2	153.041	Positive	M+H	1	4.98
Xanthurenic acid	Target Compound	C10H7NO4	206.045	Positive	M+H	1	4.59
1,3,7-Trimethyluric acid	Target Compound	C8 H10 N4 O3	209.068	Negative	M-H	1	1.88
1,7-Dimethyluric acid	Target Compound	C7H8N4O3	195.052	Negative	M-H	1	4.05
1-Methyluric acid	Target Compound	C6 H6 N4 O3	181.037	Negative	M-H	1	4.3
1-Methylxanthine / 3-Methylxanthine	Target Compound	C6H6N4O2	165.042	Negative	M-H	1	2.6
3,7-Dimethyluric acid / 1,3-Dimethyluric acid / 1,7-Dimethyluric acid	Target Compound	C7H8N4O3	195.052	Negative	M-H	1	3.11
3-Hydroxyanthranilic acid #1	Target Compound	C7H7NO3	152.035	Negative	M-H	1	1.07
3-Hydroxyanthranilic acid #2	Target Compound	C7H7NO3	152.035	Negative	M-H	1	1.67
3-Hydroxyanthranilic acid #3	Target Compound	C7H7NO3	152.035	Negative	M-H	1	5
3-Hydroxykynurenine	Target Compound	C10H12N2O4	223.072	Negative	M-H	1	4.8
3-Hydroxymethylglutaric acid	Target Compound	C6 H10 O5	161.046	Negative	M-H	1	2.53
3-Methoxy-4-hydroxyphenylethyleneglycol sulfate	Target Compound	C9 H12 O7 S	263.023	Negative	M-H	1	5.17
3-Methylhistidine	Target Compound	C7 H11 N3 O2	168.078	Negative	M-H	1	12.2
4-Acetamidobutanoic acid	Target Compound	C6 H11 N O3	144.067	Negative	M-H	1	1.85
4-Aminohippuric acid	Target Compound	C9 H10 N2 O3	193.062	Negative	M-H	1	1.95
4-Oxoproline	Target Compound	C5 H7 N O3	128.035	Negative	M-H	1	1.67
5α-Dihydrotestosterone glucuronide / Androsterone glucuronide	Target Compound	C25 H38 O8	465.249	Negative	M-H	1	2.05
9-Methyluric acid	Target Compound	C6 H6 N4 O3	181.037	Negative	M-H	1	5.2
Adenosine 5'-monophosphate	Target Compound	C10 H14 N5 O7 P	346.056	Negative	M-H	1	8.76
Allantoin	Target Compound	C4 H6 N4 O3	157.037	Negative	M-H	1	6.55
Argininosuccinic acid	Target Compound	C10H18N4O6	289.115	Negative	M-H	1	11.63
Bilirubin	Target Compound	C33 H36 N4 O6	583.256	Negative	M-H	1	3.47
Cholic acid	Target Compound	C24H40O5	453.286	Negative	M+HCO2	1	1.54
Cholic acid-d4	Internal Standard	C24D4H36O5	457.311	Negative	M+HCO2	1	1.54
Cinnamoylglycine	Target Compound	C11 H11 N O3	204.067	Negative	M-H	1	1.33
cis-Aconitic acid / trans-Aconitic acid	Target Compound	C6H6O6	173.009	Negative	M-H	1	4.87
Citric acid	Target Compound	C6H8O7	191.02	Negative	M-H	1	8.57
Creatine	Target Compound	C4 H9 N3 O2	130.062	Negative	M-H	1	8.35
Cystathionine	Target Compound	C7 H14 N2 O4 S	221.06	Negative	M-H	1	10.96
Cysteic acid	Target Compound	C3 H7 N O5 S	167.997	Negative	M-H	1	8.25
Cystine	Target Compound	C6 H12 N2 O4 S2	239.017	Negative	M-H	1	10.72
D-(-)-Lyxose	Target Compound	C5 H10 O5	149.046	Negative	M-H	1	7.09
D-Mannose 6-phosphate	Target Compound	C6 H13 O9 P	259.022	Negative	M-H	1	8
D-Ribose-1-phosphate	Target Compound	C5 H11 O8 P	229.012	Negative	M-H	1	7.6
Dehydroepiandrosterone sulfate / Testosterone sulfate	Target Compound	C19H28O5S	367.158	Negative	M-H	1	1.58
Deoxycholic acid / Chenodeoxycholic acid	Target Compound	C24H40O4	391.285	Negative	M-H	1	0
Diethyl fumarate	Target Compound	C8 H12 O4	171.066	Negative	M-H	1	1.48
Ethylmalonic acid / Methylsuccinic acid / Glutaric acid	Target Compound	C5H8O4	131.035	Negative	M-H	1	1.5
Fructose	Target Compound	C6H12O6	215.033	Negative	M+Cl	1	6
Fructose-13C6	Internal Standard	[13]C6H12O6	221.053	Negative	M+Cl	1	6.62
Fucose	Target Compound	C6H12O5	209.067	Negative	M+HCO2	1	5.84
Fumaric acid	Target Compound	C4 H4 O4	115.004	Negative	M-H	1	3.48
Gentisic acid / 3,5-Dihydroxybenzoic acid / Protocatechuic acid	Target Compound	C7 H6 O4	153.019	Negative	M-H	1	1.65
Gluconic acid	Target Compound	C6 H12 O7	195.051	Negative	M-H	1	8.56
Glucose #1	Target Compound	C6H12O6	215.033	Negative	M+Cl	1	6.86
Glucose #2	Target Compound	C6H12O6	215.033	Negative	M+Cl	1	7.06
Glucose 1-phosphate	Target Compound	C6 H13 O9 P	259.022	Negative	M-H	1	8
Glucuronic acid	Target Compound	C6 H10 O7	193.035	Negative	M-H	1	7
Glucuronic acid-3,6-lactone	Target Compound	C6 H8 O6	175.025	Negative	M-H	1	4.3
Glutamic acid	Target Compound	C5 H9 N O4	146.046	Negative	M-H	1	8.48
Glycerophospho-N-palmitoyl ethanolamine	Target Compound	C21 H44 N O7 P	452.278	Negative	M-H	1	5.47
Glycocholic acid	Target Compound	C26H43NO6	464.302	Negative	M-H	1	3.17
Glycodeoxycholic acid / Glycochenodeoxycholic acid / Glycoursodeoxycholic acid	Target Compound	C26H43NO5	448.307	Negative	M-H	1	1.67
Glycolithocholic acid	Target Compound	C26H43NO4	432.312	Negative	M-H	1	0
Glycyl-L-leucine	Target Compound	C8 H16 N2 O3	187.109	Negative	M-H	1	7.19
Guanidineacetic acid	Target Compound	C3 H7 N3 O2	116.047	Negative	M-H	1	8.97
Guanosine	Target Compound	C10 H13 N5 O5	282.084	Negative	M-H	1	6.76
Guanosine monophosphate (GMP)	Target Compound	C10 H14 N5 O8 P	362.051	Negative	M-H	1	8.6
Hippuric acid	Target Compound	C9 H9 N O3	178.051	Negative	M-H	1	1.43
Histidine	Target Compound	C6 H9 N3 O2	154.062	Negative	M-H	1	12.2
Homogentisic acid / 3,4-Dihydroxyphenylacetic acid	Target Compound	C8 H8 O4	167.035	Negative	M-H	1	1.13
Hydroxyphenyllactic acid	Target Compound	C9H10O4	181.051	Negative	M-H	1	2.85
Hypoxanthine	Target Compound	C5 H4 N4 O	135.031	Negative	M-H	1	5.12
Indolelactic acid	Target Compound	C11H11NO3	204.067	Negative	M-H	1	1.99
Indoxyl sulfate	Target Compound	C8H7NO4S	212.002	Negative	M-H	1	4.59
Inosine-5'-monophosphate (IMP)	Target Compound	C10 H13 N4 O8 P	347.04	Negative	M-H	1	7.8
Itaconic acid	Target Compound	C5 H6 O4	129.019	Negative	M-H	1	5.74
Kynurenic acid	Target Compound	C10 H7 N O3	188.035	Negative	M-H	1	3.25
L-Ascorbic acid 2-sulfate	Target Compound	C6H8O9S	254.982	Negative	M-H	1	4.63
L-Glutathione (reduced)	Target Compound	C10 H17 N3 O6 S	306.076	Negative	M-H	1	8.15
L-Saccharopine	Target Compound	C11 H20 N2 O6	275.125	Negative	M-H	1	10.54
Lactic acid	Target Compound	C3H6O3	89.0244	Negative	M-H	1	1.66
Lactose	Target Compound	C12 H22 O11	341.109	Negative	M+FA-H	1	7.8
Maleic acid	Target Compound	C4 H4 O4	115.004	Negative	M-H	1	1.28
Malic acid	Target Compound	C4 H6 O5	133.014	Negative	M-H	1	5
Malonic acid	Target Compound	C3 H4 O4	103.004	Negative	M-H	1	3.4
Mandelic acid / Hydroxyphenylacetic acid	Target Compound	C8 H8 O3	151.04	Negative	M-H	1	1.65
Mannitol / Iditol	Target Compound	C6 H14 O6	217.048	Negative	M+Cl	1	7.05
Mesaconic acid	Target Compound	C5 H6 O4	129.019	Negative	M-H	1	2.43
N-Acetyl-Asp-Glu	Target Compound	C11 H16 N2 O8	303.083	Negative	M-H	1	5.24
N-Acetyl-D-galactosamine 4-sulfate	Target Compound	C8 H15 N O9 S	300.04	Negative	M-H	1	6.92
N-Acetyl-tryptophan	Target Compound	C13 H14 N2 O3	245.093	Negative	M-H	1	1.92
N-Acetylalanine	Target Compound	C5 H9 N O3	130.051	Negative	M-H	1	8.26
N-Acetylaspartic acid	Target Compound	C6 H9 N O5	174.041	Negative	M-H	1	4.43
N-Acetylcarnosine	Target Compound	C11 H16 N4 O4	267.11	Negative	M-H	1	8.56
N-Acetylglutamine	Target Compound	C7 H12 N2 O4	187.072	Negative	M-H	1	4.6
N-Acetylneuraminic acid	Target Compound	C11 H19 N O9	308.099	Negative	M-H	1	8.6
N-Acetylornithine	Target Compound	C7 H14 N2 O3	173.093	Negative	M-H	1	7.85
N-Phenylacetylglutamine	Target Compound	C13 H16 N2 O4	263.104	Negative	M-H	1	2.5
N4-Acetylcytidine	Target Compound	C11 H15 N3 O6	284.089	Negative	M-H	1	3.9
Orotic acid	Target Compound	C5H4N2O4	155.01	Negative	M-H	1	5.16
Orotidine	Target Compound	C10 H12 N2 O8	287.052	Negative	M-H	1	6.51
p-Cresol	Target Compound	C7 H8 O	107.05	Negative	M-H	1	1.55
p-Cresol sulfate	Target Compound	C7H8O4S	187.007	Negative	M-H	1	1.5
Pantothenic acid	Target Compound	C9 H17 N O5	218.104	Negative	M-H	1	2.37
Pseudouridine	Target Compound	C9H12N2O6	243.062	Negative	M-H	1	6.1
Quinic acid	Target Compound	C7 H12 O6	191.056	Negative	M-H	1	6.11
S-Adenosylhomocysteine	Target Compound	C14 H20 N6 O5 S	383.114	Negative	M-H	1	10.42
Salicyluric acid	Target Compound	C9 H9 N O4	194.046	Negative	M-H	1	3.37
Stearic acid	Target Compound	C18 H36 O2	283.264	Negative	M-H	1	0.96
Succinic acid	Target Compound	C4H6O4	117.019	Negative	M-H	1	1.4
Succinic acid-d4	Internal Standard	C4D4H2O4	121.044	Negative	M-H	1	1.4
Sulfoglycolithocholic acid	Target Compound	C26H43NO7S	512.269	Negative	M-H	1	4.5
Taurocholic acid / Tauromuricholic acid	Target Compound	C26 H45 N O7 S	514.284	Negative	M-H	1	4.44
Taurodeoxycholic acid / Taurochenodeoxycholic acid / Tauroursodeoxycholic acid	Target Compound	C26H45NO6S	498.289	Negative	M-H	1	4.51
Taurolithocholic acid	Target Compound	C26H45NO5S	482.295	Negative	M-H	1	4.25
Threonic acid	Target Compound	C4 H8 O5	135.03	Negative	M-H	1	7.16
Tyrosine	Target Compound	C9 H11 N O3	180.067	Negative	M-H	1	7.79
Ureidopropionic acid	Target Compound	C4 H8 N2 O3	131.046	Negative	M-H	1	4.69
Uric acid	Target Compound	C5H4N4O3	167.021	Negative	M-H	1	6.46
Uridine	Target Compound	C9H12N2O6	243.062	Negative	M-H	1	5.01
Uridine monophosphate (UMP)	Target Compound	C9 H13 N2 O9 P	323.029	Negative	M-H	1	7.5
Vitamin C	Target Compound	C6 H8 O6	175.025	Negative	M-H	1	5.94
Xanthine #1	Target Compound	C5 H4 N4 O2	151.026	Negative	M-H	1	4.75
Xanthine #2	Target Compound	C5 H4 N4 O2	151.026	Negative	M-H	1	5
Xanthosine	Target Compound	C10 H12 N4 O6	283.068	Negative	M-H	1	5.89
Xanthurenic acid	Target Compound	C10 H7 N O4	204.03	Negative	M-H	1	5.3
Xylitol / Arabitol	Target Compound	C5 H12 O5	151.061	Negative	M-H	1	5.9
Xylose / Arabinose / Lyxose	Target Compound	C5 H10 O5	149.046	Negative	M-H	1	5.37
β-D-Glucopyranuronic acid	Target Compound	C6 H10 O7	193.035	Negative	M-H	1	7
β-Muricholic acid	Target Compound	C24 H40 O5	453.286	Negative	M+HCO2	1	0.8

## Sheet: Method parameters-Lipidomics
LC parameters
Solvents
A	Water + 0,1 % formic acid + 10 mM ammonium formate
B	Acetonitrile:isopropanol (2:3) + 0.1% formic acid
Rear Seal Wash	10% Isopropanol
Needle Wash	Methanol
Gradient Elution
Time [min]	A [%]	B [%]	Flowrate [mL/min]
0	75	25	0.3
0.3	75	25	0.3
1.5	20	80	0.3
11	0	100	0.3
12	0	100	0.3
12.5	75	25	0.3
14	75	25	0.3
Injection Volume
Positive Ionization Mode	2 µL
Negative Ionization Mode	5 µL
Positive Ionization					Negative Ionization
MS parameters					MS parameters
Ion Source					Ion Source
Parameters	Value				Parameters	Value
Ion Source Type:	H-ESI				Ion Source Type:	H-ESI
Spray Voltage:	Static				Spray Voltage:	Static
Positive Ion (V):	3000				Positive Ion (V):	3000
Negative Ion (V):	2500				Negative Ion (V):	2500
Gas Mode:	Static				Gas Mode:	Static
Sheath Gas (Arb):	40				Sheath Gas (Arb):	40
Aux Gas (Arb):	20				Aux Gas (Arb):	20
Sweep Gas (Arb):	0				Sweep Gas (Arb):	0
Ion Transfer Tube Temp (°C):	260				Ion Transfer Tube Temp (°C):	260
Vaporizer Temp (°C):	290				Vaporizer Temp (°C):	290
MS Global Settings					MS Global Settings
Parameters	Value				Parameters	Value
Infusion Mode:	Liquid Chromatography				Infusion Mode:	Liquid Chromatography
Expected LC Peak Width (s):	6				Expected LC Peak Width (s):	6
Advanced Peak Determination:	TRUE				Advanced Peak Determination:	TRUE
Mild Trapping:	TRUE				Mild Trapping:	TRUE
Default Charge State:	1				Default Charge State:	1
Enable Xcalibur AcquireX method configurations:	TRUE				Enable Xcalibur AcquireX method configurations:	TRUE
Internal Mass Calibration:	RunStart EASY-IC™				Internal Mass Calibration:	RunStart EASY-IC™
Settings for Full Scan					Settings for Full Scan
Orbitrap Resolution:	120000				Orbitrap Resolution:	120000
Scan Range (m/z):	180-1500				Scan Range (m/z):	180-1500
RF Lens (%):	25				RF Lens (%):	25
AGC Target:	Custom				AGC Target:	Custom
Normalized AGC Target (%):	100				Normalized AGC Target (%):	100
Maximum Injection Time Mode:	Auto				Maximum Injection Time Mode:	Auto
Microscans:	1				Microscans:	1
Data Type:	Profile				Data Type:	Profile
Polarity:	Positive				Polarity:	Negative
Source Fragmentation:	Disabled				Source Fragmentation:	Disabled
Filters					Filters
Intensity					Intensity
Filter Type:	Intensity Threshold				Filter Type:	Intensity Threshold
Intensity Threshold:	5000				Intensity Threshold:	5000
Dynamic Exclusion					Dynamic Exclusion
Dynamic Exclusion Mode:	Custom				Dynamic Exclusion Mode:	Custom
Exclude after n times:	1				Exclude after n times:	1
Exclusion duration (s):	5				Exclusion duration (s):	5
Mass Tolerance:	ppm				Mass Tolerance:	ppm
Low	10				Low	10
High	10				High	10
Exclude isotopes:	TRUE				Exclude isotopes:	TRUE
Perform dependent scan on single charge state per precursor only:	FALSE				Perform dependent scan on single charge state per precursor only:	FALSE
Targeted Mass					Targeted Mass
Mass List					Mass List
Mass List Type:	m/z				Mass List Type:	m/z
Time Mode:	Start/End Time				Time Mode:	Start/End Time
Include Intensity Threshold:	TRUE				Include Intensity Threshold:	TRUE
Add Mass List Targets Determined by Xcalibur AcquireX:	TRUE				Add Mass List Targets Determined by Xcalibur AcquireX:	TRUE
Compound	m/z	t start (min)	t stop (min)	Intensity Threshold	Compound	m/z	t start (min)	t stop (min)	Intensity Threshold
MRFA (Placeholder)	524.265	0	14	0	MRFA (Placeholder)	524.265	0	14	0
Mass Tolerance:	ppm				Mass Tolerance:	ppm
Low:	10				Low:	10
High:	10				High:	10
Set Collision Energy per Compound:	FALSE				Set Collision Energy per Compound:	FALSE
Perform dependent scan on most intense ion if no targets are found:	TRUE				Perform dependent scan on most intense ion if no targets are found:	TRUE
Targeted Mass Exclusion					Targeted Mass Exclusion
Mass List					Mass List
Mass List Type:	m/z				Mass List Type:	m/z
Time Mode:	Start/End Time				Time Mode:	Start/End Time
Include Intensity Threshold:	TRUE				Include Intensity Threshold:	TRUE
Add Mass List Targets Determined by Xcalibur AcquireX:	TRUE				Add Mass List Targets Determined by Xcalibur AcquireX:	TRUE
Compound	m/z	t start (min)	t stop (min)	Intensity Threshold	Compound	m/z	t start (min)	t stop (min)	Intensity Threshold
Mass list created via AcquireX					Mass list created via AcquireX
Mass Tolerance:	ppm				Mass Tolerance:	ppm
Low:	10				Low:	10
High:	10				High:	10
Apex Detection					Apex Detection
Desired Apex Window (%):	30				Desired Apex Window (%):	30
Data Dependent					Data Dependent
Data Dependent Mode:	Cycle Time				Data Dependent Mode:	Cycle Time
Time between Master Scans (sec):	0.6				Time between Master Scans (sec):	0.6
Settings for ddMS2					Settings for ddMS2
Multiplex Ions:	FALSE				Multiplex Ions:	FALSE
Isolation Window (m/z):	1				Isolation Window (m/z):	1
Isolation Offset:	Off				Isolation Offset:	Off
Collision Energy Mode:	Stepped				Collision Energy Mode:	Stepped
Collision Energy Type:	Normalized				Collision Energy Type:	Normalized
HCD Collision Energies (V):	15,30,50				HCD Collision Energies (V):	15,30,50
Orbitrap Resolution:	15000				Orbitrap Resolution:	15000
Scan Range Mode:	Auto				Scan Range Mode:	Auto
AGC Target:	Custom				AGC Target:	Custom
Normalized AGC Target (%):	10				Normalized AGC Target (%):	10
Maximum Injection Time Mode:	Auto				Maximum Injection Time Mode:	Auto
Microscans:	1				Microscans:	1
Data Type:	Centroid				Data Type:	Centroid
Settings for AcquireX
Algorithm:	Background Exclusion
Description:	Create and use an exclusion list of constant background ions and peaks to reduce background fragmentation in your ID runs.
Used reference sample:	An extraced blank sample was used to create the exclusion lists for positive and negative ionization modes.
Exclusion Override Factor:	3
Excluison List Peak Window Extension (s):	6
Internal Standards
Isotopically labeled internal standard	Vendor	Category	Concentration of standard working solution [ng/mL]	Volume of working solution [µL]	Sample Volume [µL]	Concentration related to sample [ng/mL]
Arachidonic acid-d8	Cayman Chemicals	D	750	10	20	375
CE 18:1-d7	Avanti Polar Lipids	J	37500	10	20	18800
Cer d18:1/16:0-d7	Avanti Polar Lipids	A	150	10	20	75
Cholesterol-d7	Avanti Polar Lipids	K	56300	10	20	28200
DG 15:0/18:1-d7	Avanti Polar Lipids	F	2250	10	20	1130
LacCer d18:1/17:0	Avanti Polar Lipids	C	450	10	20	225
LPC 18:1-d7	Avanti Polar Lipids	F	2250	10	20	1130
LPC O-16:0-d4	Cayman Chemicals	A	150	10	20	75
LPE 18:1-d7	Avanti Polar Lipids	A	150	10	20	75
LPG 17:1	Avanti Polar Lipids	A	150	10	20	75
LPI 17:1	Avanti Polar Lipids	A	150	10	20	75
PC 15:0/18:1-d7	Avanti Polar Lipids	I	15000	10	20	7500
PC O-18:0/18:1-d9	Avanti Polar Lipids	E	1500	10	20	750
PE 15:0/18:1-d7	Avanti Polar Lipids	D	750	10	20	375
PG 15:0/18:1-d7	Avanti Polar Lipids	D	750	10	20	375
PI 15:0/18:1-d7	Avanti Polar Lipids	D	750	10	20	375
PS 15:0/18:1-d7	Avanti Polar Lipids	B	188	10	20	94
SM d18:1/18:1-d9	Avanti Polar Lipids	G	3000	10	20	1500
TG 14:0/16:1/14:0-d5	Avanti Polar Lipids	H	4500	10	20	2250
TG 15:0/18:1-d7/15:0	Avanti Polar Lipids	H	4500	10	20	2250
TG 20:0/20:1/20:0-d5	Avanti Polar Lipids	H	4500	10	20	2250
*Avanti Polar Lipids	Alabaster, AL, USA
*Cayman Chemicals	Ann Arbor, MI, USA
LC-MS/MS Instrumentation and Analysis
Instrumentation
HPLC:	Vanquish Horizon (Thermo Fisher)
MS:	Orbitrap Exploris 480 (Thermo Fisher)
Mode	H-ESI - positive and negative electrospray ionization
Column	Zorbax RRHD Eclipse Plus C8 2.1 x 50 mm, 1.8µm (Agilent)
Pre-column	Zorbax Eclipse Plus C8 2.1 mm, 1.8 µm (Agilent)
Analysis
Data Acquisition	Xcalibur 4.4 (Thermo Fisher)
Data Evaluation	TraceFinder 5.1 (Thermo Fisher)
Method	Scan + ddMS2
Acceptance criteria
The following analytes were excluded from data evaluation:
- Analytes showing a mass error > 5 ppm
- Analytes showing an isotope score < 40 (10 ppm, 90% intensity)
- Analytes without identity confirmation via spectral library matching or reference substance measurements
- Analytes containing only missing values in QC samples and study samples
- Analytes containing > 10% missing values in QC samples and study samples
- Analytes showing > 20% area RSD in QC samples
Acquisition List
Compound Name	Compound Type	Compound Formula	m/z	Polarity	Adduct	Charge State	Retention Time
AHexCer 56:1;3O	Target Compound	C62H119NO10	1038.89	Positive	M+H	1	8.95
AHexCer 58:1;3O	Target Compound	C64H123NO10	1066.92	Positive	M+H	1	9.34
AHexCer 58:2;3O	Target Compound	C64H121NO10	1064.91	Positive	M+H	1	8.97
AHexCer 60:2;3O	Target Compound	C66H125NO10	1092.94	Positive	M+H	1	9.38
CAR 10:0	Target Compound	C17H33NO4	316.248	Positive	M+H	1	2
CAR 10:1	Target Compound	C17H31NO4	314.233	Positive	M+H	1	1.89
CAR 12:0	Target Compound	C19H37NO4	344.28	Positive	M+H	1	2.21
CAR 12:1	Target Compound	C19H35NO4	342.264	Positive	M+H	1	2.13
CAR 13:1	Target Compound	C20H37NO4	356.28	Positive	M+H	1	2.2
CAR 14:0	Target Compound	C21H41NO4	372.311	Positive	M+H	1	2.37
CAR 14:1	Target Compound	C21H39NO4	370.295	Positive	M+H	1	2.28
CAR 16:0	Target Compound	C23H45NO4	400.342	Positive	M+H	1	2.5
CAR 16:1	Target Compound	C23H43NO4	398.326	Positive	M+H	1	2.42
CAR 18:0	Target Compound	C25H49NO4	428.373	Positive	M+H	1	2.65
CAR 18:1	Target Compound	C25H47NO4	426.358	Positive	M+H	1	2.55
CAR 18:2	Target Compound	C25H45NO4	424.342	Positive	M+H	1	2.45
CAR 20:0	Target Compound	C27H53NO4	456.405	Positive	M+H	1	2.81
CAR 20:1	Target Compound	C27H51NO4	454.389	Positive	M+H	1	2.68
CAR 20:2	Target Compound	C27H49NO4	452.373	Positive	M+H	1	2.56
CAR 20:4	Target Compound	C27H45NO4	448.342	Positive	M+H	1	2.45
CAR 22:1	Target Compound	C29H55NO4	482.42	Positive	M+H	1	2.85
CAR 22:2	Target Compound	C29H53NO4	480.405	Positive	M+H	1	2.71
CAR 8:0	Target Compound	C15H29NO4	288.217	Positive	M+H	1	1.7
CE 18:1-d7	Internal Standard	D7C45H71O2	675.678	Positive	M+NH4	1	9.42
Cer 18:0;2O/16:0	Target Compound	C34H69NO3	540.535	Positive	M+H	1	5.13
Cer 18:0;2O/22:0	Target Compound	C40H81NO3	624.629	Positive	M+H	1	6.87
Cer 18:0;2O/24:0	Target Compound	C42H85NO3	652.66	Positive	M+H	1	7.48
Cer 18:0;2O/24:1	Target Compound	C42H83NO3	650.645	Positive	M+H	1	6.89
Cer 18:1;2O/16:0	Target Compound	C34H67NO3	538.519	Positive	M+H	1	4.92
Cer 18:1;2O/16:0-d7	Internal Standard	D7C34H60NO3	545.563	Positive	M+H	1	4.92
Cer 18:1;2O/18:0	Target Compound	C36H71NO3	566.551	Positive	M+H	1	5.48
Cer 18:1;2O/20:0	Target Compound	C38H75NO3	594.582	Positive	M+H	1	6.16
Cer 18:1;2O/21:0	Target Compound	C39H77NO3	608.598	Positive	M+H	1	6.45
Cer 18:1;2O/22:0	Target Compound	C40H79NO3	622.613	Positive	M+H	1	6.67
Cer 18:1;2O/23:0	Target Compound	C41H81NO3	636.629	Positive	M+H	1	6.98
Cer 18:1;2O/24:0	Target Compound	C42H83NO3	650.645	Positive	M+H	1	7.27
Cer 18:1;2O/24:1	Target Compound	C42H81NO3	648.629	Positive	M+H	1	6.69
Cer 18:1;2O/26:0	Target Compound	C44H87NO3	678.676	Positive	M+H	1	7.82
Cer 18:1;2O/36:10	Target Compound	C54H87NO3	798.676	Positive	M+H	1	6.32
Cer 18:1;2O/38:10	Target Compound	C56H91NO3	826.707	Positive	M+H	1	6.92
Cer 18:2;2O/16:0	Target Compound	C34H65NO3	536.504	Positive	M+H	1	4.37
Cer 18:2;2O/22:0	Target Compound	C40H77NO3	620.598	Positive	M+H	1	6.2
Cer 18:2;2O/23:0	Target Compound	C41H79NO3	634.613	Positive	M+H	1	6.51
Cer 18:2;2O/24:1	Target Compound	C42H79NO3	646.613	Positive	M+H	1	6.21
Cholesterol-d7	Internal Standard	D7C27H39O	376.396	Positive	M-OH-	1	3.93
DG 15:0/18:1-d7	Internal Standard	D7C36H61O5	605.584	Positive	M+NH4	1	5.59
DG 30:1	Target Compound	C33H62O5	556.494	Positive	M+NH4	1	4.8
DG 31:0	Target Compound	C34H66O5	572.525	Positive	M+NH4	1	5.5
DG 31:1	Target Compound	C34H64O5	570.509	Positive	M+NH4	1	5.05
DG 32:0	Target Compound	C35H68O5	586.54	Positive	M+NH4	1	5.8
DG 32:1	Target Compound	C35H66O5	584.525	Positive	M+NH4	1	5.35
DG 32:2	Target Compound	C35H64O5	582.509	Positive	M+NH4	1	4.94
DG 33:0	Target Compound	C36H70O5	600.556	Positive	M+NH4	1	6.05
DG 33:1	Target Compound	C36H68O5	598.54	Positive	M+NH4	1	5.6
DG 34:0	Target Compound	C37H72O5	614.572	Positive	M+NH4	1	6.35
DG 34:1	Target Compound	C37H70O5	612.556	Positive	M+NH4	1	5.9
DG 34:2	Target Compound	C37H68O5	610.54	Positive	M+NH4	1	5.48
DG 34:3	Target Compound	C37H66O5	608.525	Positive	M+NH4	1	5.05
DG 35:1	Target Compound	C38H72O5	626.572	Positive	M+NH4	1	6.2
DG 35:2	Target Compound	C38H70O5	624.556	Positive	M+NH4	1	5.76
DG 36:0	Target Compound	C39H76O5	642.603	Positive	M+NH4	1	6.95
DG 36:1	Target Compound	C39H74O5	640.587	Positive	M+NH4	1	6.5
DG 36:2	Target Compound	C39H72O5	638.572	Positive	M+NH4	1	6.05
DG 36:3	Target Compound	C39H70O5	636.556	Positive	M+NH4	1	5.6
DG 36:4	Target Compound	C39H68O5	634.54	Positive	M+NH4	1	5.09
DG 36:5	Target Compound	C39H66O5	632.525	Positive	M+NH4	1	4.7
DG 38:1	Target Compound	C41H78O5	668.619	Positive	M+NH4	1	6.8
DG 38:2	Target Compound	C41H76O5	666.603	Positive	M+NH4	1	6.33
DG 38:3	Target Compound	C41H74O5	664.587	Positive	M+NH4	1	5.9
DG 38:4	Target Compound	C41H72O5	662.572	Positive	M+NH4	1	5.9
DG 38:5	Target Compound	C41H70O5	660.556	Positive	M+NH4	1	5.38
DG 38:6	Target Compound	C41H68O5	658.54	Positive	M+NH4	1	4.97
DG 40:6	Target Compound	C43H72O5	686.572	Positive	M+NH4	1	5.4
DG 40:7	Target Compound	C43H70O5	684.556	Positive	M+NH4	1	5.19
DG 40:8	Target Compound	C43H68O5	682.54	Positive	M+NH4	1	4.76
DG 44:8	Target Compound	C47H76O5	738.603	Positive	M+NH4	1	5.85
Hex2Cer 18:1;2O/16:0	Target Compound	C46H87NO13	862.625	Positive	M+H	1	4.24
Hex2Cer 18:1;2O/24:0	Target Compound	C54H103NO13	974.75	Positive	M+H	1	6.37
Hex2Cer 18:1;2O/24:1	Target Compound	C54H101NO13	972.735	Positive	M+H	1	5.76
HexCer 18:0;2O/18:0	Target Compound	C42H83NO8	730.619	Positive	M+H	1	5.15
HexCer 18:0;2O/22:0	Target Compound	C46H91NO8	786.682	Positive	M+H	1	6.28
HexCer 18:0;2O/22:0;O	Target Compound	C46H91NO9	802.677	Positive	M+H	1	6.22
HexCer 18:0;2O/23:0	Target Compound	C47H93NO8	800.697	Positive	M+H	1	6.58
HexCer 18:0;2O/24:0	Target Compound	C48H95NO8	814.713	Positive	M+H	1	6.87
HexCer 18:0;2O/24:0;O	Target Compound	C48H95NO9	830.708	Positive	M+H	1	6.84
HexCer 18:1;2O/18:0	Target Compound	C42H81NO8	728.603	Positive	M+H	1	4.94
HexCer 18:1;2O/18:0;O	Target Compound	C42H81NO9	744.598	Positive	M+H	1	4.88
HexCer 18:1;2O/20:0	Target Compound	C44H85NO8	756.635	Positive	M+H	1	5.52
HexCer 18:1;2O/20:0;O	Target Compound	C44H85NO9	772.63	Positive	M+H	1	5.42
HexCer 18:1;2O/21:0;O	Target Compound	C45H87NO9	786.645	Positive	M+H	1	5.7
HexCer 18:1;2O/22:0	Target Compound	C46H89NO8	784.666	Positive	M+H	1	6.07
HexCer 18:1;2O/22:0;O	Target Compound	C46H89NO9	800.661	Positive	M+H	1	5.95
HexCer 18:1;2O/22:1	Target Compound	C46H87NO8	782.65	Positive	M+H	1	5.51
HexCer 18:1;2O/22:1;O	Target Compound	C46H87NO9	798.645	Positive	M+H	1	5.46
HexCer 18:1;2O/23:0;O	Target Compound	C47H91NO9	814.677	Positive	M+H	1	6.3
HexCer 18:1;2O/23:1	Target Compound	C47H89NO8	796.666	Positive	M+H	1	5.79
HexCer 18:1;2O/23:1;O	Target Compound	C47H89NO9	812.661	Positive	M+H	1	5.8
HexCer 18:1;2O/24:0	Target Compound	C48H93NO8	812.697	Positive	M+H	1	6.71
HexCer 18:1;2O/24:0;O	Target Compound	C48H93NO9	828.692	Positive	M+H	1	6.6
HexCer 18:1;2O/24:1	Target Compound	C48H91NO8	810.682	Positive	M+H	1	6.06
HexCer 18:1;2O/24:1;O	Target Compound	C48H91NO9	826.677	Positive	M+H	1	6
HexCer 18:1;2O/24:2	Target Compound	C48H89NO8	808.666	Positive	M+H	1	5.6
HexCer 18:1;2O/24:2;O	Target Compound	C48H89NO9	824.661	Positive	M+H	1	5.52
HexCer 18:1;2O/25:0;O	Target Compound	C49H95NO9	842.708	Positive	M+H	1	6.84
HexCer 18:1;2O/25:1	Target Compound	C49H93NO8	824.697	Positive	M+H	1	6.29
HexCer 18:1;2O/25:1;O	Target Compound	C49H93NO9	840.692	Positive	M+H	1	6.28
HexCer 18:1;2O/40:2;O	Target Compound	C64H121NO9	1048.91	Positive	M+H	1	9.07
HexCer 18:1;2O/42:2;O	Target Compound	C66H125NO9	1076.94	Positive	M+H	1	9.44
HexCer 18:2;2O/24:0	Target Compound	C48H91NO8	810.682	Positive	M+H	1	6.16
LacCer 18:1;2O/17:0	Internal Standard	C47H89NO13	876.641	Positive	M+H	1	4.46
LPC 14:0	Target Compound	C22H46NO7P	468.308	Positive	M+H	1	2.45
LPC 15:0	Target Compound	C23H48NO7P	482.324	Positive	M+H	1	2.53
LPC 16:0	Target Compound	C24H50NO7P	496.34	Positive	M+H	1	2.61
LPC 16:1	Target Compound	C24H48NO7P	494.324	Positive	M+H	1	2.49
LPC 17:0	Target Compound	C25H52NO7P	510.355	Positive	M+H	1	2.68
LPC 18:0	Target Compound	C26H54NO7P	524.371	Positive	M+H	1	2.78
LPC 18:1	Target Compound	C26H52NO7P	522.355	Positive	M+H	1	2.65
LPC 18:1-d7	Internal Standard	D7C26H45NO7P	529.399	Positive	M+H	1	2.65
LPC 18:2	Target Compound	C26H50NO7P	520.34	Positive	M+H	1	2.53
LPC 18:3	Target Compound	C26H48NO7P	518.324	Positive	M+H	1	2.45
LPC 19:0	Target Compound	C27H56NO7P	538.387	Positive	M+H	1	2.88
LPC 19:1	Target Compound	C27H54NO7P	536.371	Positive	M+H	1	2.73
LPC 20:0	Target Compound	C28H58NO7P	552.402	Positive	M+H	1	3
LPC 20:1	Target Compound	C28H56NO7P	550.387	Positive	M+H	1	2.81
LPC 20:2	Target Compound	C28H54NO7P	548.371	Positive	M+H	1	2.68
LPC 20:3	Target Compound	C28H52NO7P	546.355	Positive	M+H	1	2.78
LPC 20:4	Target Compound	C28H50NO7P	544.34	Positive	M+H	1	2.52
LPC 20:5	Target Compound	C28H48NO7P	542.324	Positive	M+H	1	2.4
LPC 22:0	Target Compound	C30H62NO7P	580.434	Positive	M+H	1	3.3
LPC 22:4	Target Compound	C30H54NO7P	572.371	Positive	M+H	1	2.64
LPC 22:5	Target Compound	C30H52NO7P	570.355	Positive	M+H	1	2.53
LPC 22:6	Target Compound	C30H50NO7P	568.34	Positive	M+H	1	2.49
LPC 24:0	Target Compound	C32H66NO7P	608.465	Positive	M+H	1	3.65
LPC 24:1	Target Compound	C32H64NO7P	606.449	Positive	M+H	1	3.3
LPC O-16:0-d4	Internal Standard	D4C24H48NO6P	486.386	Positive	M+H	1	2.69
LPC O-24:1	Target Compound	C32H66NO6P	592.47	Positive	M+H	1	3.48
LPE 18:1-d7	Internal Standard	D7C23H39NO7P	487.352	Positive	M+H	1	2.67
LPG 17:1	Internal Standard	C23H45O9P	514.314	Positive	M+NH4	1	2.48
LPI 17:1	Internal Standard	C26H49O12P	602.33	Positive	M+NH4	1	2.45
PC 15:0/18:1-d7	Internal Standard	D7C41H73NO8P	753.613	Positive	M+H	1	4.47
PC 25:0	Target Compound	C33H66NO8P	636.46	Positive	M+H	1	3.2
PC 28:0	Target Compound	C36H72NO8P	678.507	Positive	M+H	1	3.8
PC 28:1	Target Compound	C36H70NO8P	676.491	Positive	M+H	1	3.52
PC 29:0	Target Compound	C37H74NO8P	692.522	Positive	M+H	1	3.98
PC 30:0	Target Compound	C38H76NO8P	706.538	Positive	M+H	1	4.17
PC 30:1	Target Compound	C38H74NO8P	704.522	Positive	M+H	1	3.87
PC 30:2	Target Compound	C38H72NO8P	702.507	Positive	M+H	1	3.6
PC 31:0	Target Compound	C39H78NO8P	720.554	Positive	M+H	1	4.39
PC 31:1	Target Compound	C39H76NO8P	718.538	Positive	M+H	1	4.05
PC 31:2	Target Compound	C39H74NO8P	716.522	Positive	M+H	1	3.72
PC 32:0	Target Compound	C40H80NO8P	734.569	Positive	M+H	1	4.59
PC 32:1	Target Compound	C40H78NO8P	732.554	Positive	M+H	1	4.26
PC 32:2	Target Compound	C40H76NO8P	730.538	Positive	M+H	1	3.93
PC 33:0	Target Compound	C41H82NO8P	748.585	Positive	M+H	1	4.8
PC 33:1	Target Compound	C41H80NO8P	746.569	Positive	M+H	1	4.47
PC 33:2	Target Compound	C41H78NO8P	744.554	Positive	M+H	1	4.14
PC 33:3	Target Compound	C41H76NO8P	742.538	Positive	M+H	1	3.77
PC 34:0	Target Compound	C42H84NO8P	762.601	Positive	M+H	1	5.1
PC 34:0;O	Target Compound	C42H82NO9P	776.58	Positive	M+H	1	4.2
PC 34:1	Target Compound	C42H82NO8P	760.585	Positive	M+H	1	4.69
PC 34:2	Target Compound	C42H80NO8P	758.569	Positive	M+H	1	4.33
PC 34:3	Target Compound	C42H78NO8P	756.554	Positive	M+H	1	4.03
PC 34:4	Target Compound	C42H76NO8P	754.538	Positive	M+H	1	3.9
PC 34:5	Target Compound	C42H74NO8P	752.522	Positive	M+H	1	3.62
PC 35:0	Target Compound	C43H86NO8P	776.616	Positive	M+H	1	5.3
PC 35:1	Target Compound	C43H84NO8P	774.601	Positive	M+H	1	4.94
PC 35:2	Target Compound	C43H82NO8P	772.585	Positive	M+H	1	4.56
PC 35:3	Target Compound	C43H80NO8P	770.569	Positive	M+H	1	4.23
PC 35:4	Target Compound	C43H78NO8P	768.554	Positive	M+H	1	4.08
PC 36:0	Target Compound	C44H88NO8P	790.632	Positive	M+H	1	5.62
PC 36:1	Target Compound	C44H86NO8P	788.616	Positive	M+H	1	5.21
PC 36:2	Target Compound	C44H84NO8P	786.601	Positive	M+H	1	4.81
PC 36:3	Target Compound	C44H82NO8P	784.585	Positive	M+H	1	4.46
PC 36:4	Target Compound	C44H80NO8P	782.569	Positive	M+H	1	4.28
PC 36:4;O	Target Compound	C44H80NO9P	798.564	Positive	M+H	1	3.84
PC 36:5	Target Compound	C44H78NO8P	780.554	Positive	M+H	1	3.98
PC 36:6	Target Compound	C44H76NO8P	778.538	Positive	M+H	1	3.74
PC 37:1	Target Compound	C45H88NO8P	802.632	Positive	M+H	1	5.48
PC 37:2	Target Compound	C45H86NO8P	800.616	Positive	M+H	1	5.06
PC 37:3	Target Compound	C45H84NO8P	798.601	Positive	M+H	1	4.66
PC 37:4	Target Compound	C45H82NO8P	796.585	Positive	M+H	1	4.51
PC 37:6	Target Compound	C45H78NO8P	792.554	Positive	M+H	1	3.93
PC 38:0	Target Compound	C46H92NO8P	818.663	Positive	M+H	1	6.21
PC 38:1	Target Compound	C46H90NO8P	816.648	Positive	M+H	1	5.68
PC 38:2	Target Compound	C46H88NO8P	814.632	Positive	M+H	1	5.24
PC 38:3	Target Compound	C46H86NO8P	812.616	Positive	M+H	1	4.93
PC 38:4	Target Compound	C46H84NO8P	810.601	Positive	M+H	1	4.75
PC 38:5	Target Compound	C46H82NO8P	808.585	Positive	M+H	1	4.39
PC 38:6	Target Compound	C46H80NO8P	806.569	Positive	M+H	1	4.14
PC 38:7	Target Compound	C46H78NO8P	804.554	Positive	M+H	1	3.85
PC 39:1	Target Compound	C47H92NO8P	830.663	Positive	M+H	1	6.03
PC 39:2	Target Compound	C47H90NO8P	828.648	Positive	M+H	1	5.6
PC 39:3	Target Compound	C47H88NO8P	826.632	Positive	M+H	1	5.19
PC 39:4	Target Compound	C47H86NO8P	824.616	Positive	M+H	1	5.01
PC 39:5	Target Compound	C47H84NO8P	822.601	Positive	M+H	1	4.55
PC 39:6	Target Compound	C47H82NO8P	820.585	Positive	M+H	1	4.31
PC 39:7	Target Compound	C47H80NO8P	818.569	Positive	M+H	1	4.02
PC 40:0	Target Compound	C48H96NO8P	846.695	Positive	M+H	1	6.81
PC 40:1	Target Compound	C48H94NO8P	844.679	Positive	M+H	1	6.34
PC 40:2	Target Compound	C48H92NO8P	842.663	Positive	M+H	1	5.9
PC 40:4	Target Compound	C48H88NO8P	838.632	Positive	M+H	1	5.25
PC 40:6	Target Compound	C48H84NO8P	834.601	Positive	M+H	1	4.56
PC 40:7	Target Compound	C48H82NO8P	832.585	Positive	M+H	1	4.2
PC 40:8	Target Compound	C48H80NO8P	830.569	Positive	M+H	1	3.93
PC 41:1	Target Compound	C49H96NO8P	858.695	Positive	M+H	1	6.6
PC 41:2	Target Compound	C49H94NO8P	856.679	Positive	M+H	1	6.18
PC 41:6	Target Compound	C49H86NO8P	848.616	Positive	M+H	1	4.76
PC 42:1	Target Compound	C50H98NO8P	872.71	Positive	M+H	1	6.94
PC 42:10	Target Compound	C50H80NO8P	854.569	Positive	M+H	1	3.81
PC 42:2	Target Compound	C50H96NO8P	870.695	Positive	M+H	1	6.47
PC 42:4	Target Compound	C50H92NO8P	866.663	Positive	M+H	1	5.6
PC 42:5	Target Compound	C50H90NO8P	864.648	Positive	M+H	1	5.1
PC 42:6	Target Compound	C50H88NO8P	862.632	Positive	M+H	1	4.86
PC 42:7	Target Compound	C50H86NO8P	860.616	Positive	M+H	1	4.62
PC 42:8	Target Compound	C50H84NO8P	858.601	Positive	M+H	1	4.23
PC 42:9	Target Compound	C50H82NO8P	856.585	Positive	M+H	1	4
PC 43:1	Target Compound	C51H100NO8P	886.726	Positive	M+H	1	7.19
PC 43:2	Target Compound	C51H98NO8P	884.71	Positive	M+H	1	6.78
PC 44:1	Target Compound	C52H102NO8P	900.742	Positive	M+H	1	7.47
PC 44:10	Target Compound	C52H84NO8P	882.601	Positive	M+H	1	4.23
PC 44:11	Target Compound	C52H82NO8P	880.585	Positive	M+H	1	3.91
PC 44:12	Target Compound	C52H80NO8P	878.569	Positive	M+H	1	3.6
PC 44:2	Target Compound	C52H100NO8P	898.726	Positive	M+H	1	7.05
PC 44:4	Target Compound	C52H96NO8P	894.695	Positive	M+H	1	6.35
PC 44:5	Target Compound	C52H94NO8P	892.679	Positive	M+H	1	5.81
PC 44:8	Target Compound	C52H88NO8P	886.632	Positive	M+H	1	4.58
PC O-16:0_16:0	Target Compound	C40H82NO7P	720.59	Positive	M+H	1	4.94
PC O-16:0_18:2	Target Compound	C42H82NO7P	744.59	Positive	M+H	1	5.02
PC O-16:0_20:4	Target Compound	C44H82NO7P	768.59	Positive	M+H	1	4.59
PC O-16:1_16:0	Target Compound	C40H80NO7P	718.575	Positive	M+H	1	4.89
PC O-16:1_18:1	Target Compound	C42H82NO7P	744.59	Positive	M+H	1	4.66
PC O-16:1_18:2	Target Compound	C42H80NO7P	742.575	Positive	M+H	1	4.6
PC O-16:1_20:4	Target Compound	C44H80NO7P	766.575	Positive	M+H	1	4.53
PC O-18:0/18:1-d9	Internal Standard	D9C44H77NO7P	781.678	Positive	M+H	1	5.51
PC O-18:0_20:4	Target Compound	C46H86NO7P	796.621	Positive	M+H	1	5.1
PC O-18:1_18:1	Target Compound	C44H86NO7P	772.621	Positive	M+H	1	5.16
PC O-18:1_18:2	Target Compound	C44H84NO7P	770.606	Positive	M+H	1	4.75
PC O-18:1_20:4	Target Compound	C46H84NO7P	794.606	Positive	M+H	1	4.65
PC O-30:0	Target Compound	C38H78NO7P	692.559	Positive	M+H	1	5.84
PC O-30:1	Target Compound	C38H76NO7P	690.543	Positive	M+H	1	5.34
PC O-31:0	Target Compound	C39H80NO7P	706.575	Positive	M+H	1	5.26
PC O-31:1	Target Compound	C39H78NO7P	704.559	Positive	M+H	1	6.47
PC O-32:2	Target Compound	C40H78NO7P	716.559	Positive	M+H	1	4.6
PC O-33:0	Target Compound	C41H84NO7P	734.606	Positive	M+H	1	4.35
PC O-33:1	Target Compound	C41H82NO7P	732.59	Positive	M+H	1	4.59
PC O-34:0	Target Compound	C42H86NO7P	748.621	Positive	M+H	1	4.86
PC O-34:1	Target Compound	C42H84NO7P	746.606	Positive	M+H	1	5.05
PC O-34:4	Target Compound	C42H78NO7P	740.559	Positive	M+H	1	4.34
PC O-36:0	Target Compound	C44H90NO7P	776.653	Positive	M+H	1	4.9
PC O-36:1	Target Compound	C44H88NO7P	774.637	Positive	M+H	1	5.51
PC O-36:6	Target Compound	C44H78NO7P	764.559	Positive	M+H	1	4.4
PC O-37:4	Target Compound	C45H84NO7P	782.606	Positive	M+H	1	4.86
PC O-37:6	Target Compound	C45H80NO7P	778.575	Positive	M+H	1	4.5
PC O-38:1	Target Compound	C46H92NO7P	802.668	Positive	M+H	1	4.9
PC O-38:10	Target Compound	C46H74NO7P	784.528	Positive	M+H	1	4.15
PC O-38:2_1	Target Compound	C46H90NO7P	800.653	Positive	M+H	1	6.29
PC O-38:2_2	Target Compound	C46H90NO7P	800.653	Positive	M+H	1	4.6
PC O-38:3	Target Compound	C46H88NO7P	798.637	Positive	M+H	1	4.9
PC O-38:6	Target Compound	C46H82NO7P	792.59	Positive	M+H	1	4.55
PC O-38:7	Target Compound	C46H80NO7P	790.575	Positive	M+H	1	4.45
PC O-38:9	Target Compound	C46H76NO7P	786.543	Positive	M+H	1	4.25
PC O-39:1	Target Compound	C47H94NO7P	816.684	Positive	M+H	1	5.05
PC O-39:6	Target Compound	C47H84NO7P	806.606	Positive	M+H	1	4.6
PC O-39:8	Target Compound	C47H80NO7P	802.575	Positive	M+H	1	4.55
PC O-40:10	Target Compound	C48H78NO7P	812.559	Positive	M+H	1	4.25
PC O-40:11	Target Compound	C48H76NO7P	810.543	Positive	M+H	1	4.15
PC O-40:2	Target Compound	C48H94NO7P	828.684	Positive	M+H	1	5.05
PC O-40:4	Target Compound	C48H90NO7P	824.653	Positive	M+H	1	5.36
PC O-40:5	Target Compound	C48H88NO7P	822.637	Positive	M+H	1	4.77
PC O-40:6	Target Compound	C48H86NO7P	820.621	Positive	M+H	1	4.65
PC O-40:7	Target Compound	C48H84NO7P	818.606	Positive	M+H	1	4.55
PC O-40:8	Target Compound	C48H82NO7P	816.59	Positive	M+H	1	4.45
PC O-40:9	Target Compound	C48H80NO7P	814.575	Positive	M+H	1	4.35
PC O-42:10	Target Compound	C50H82NO7P	840.59	Positive	M+H	1	4.5
PC O-42:3	Target Compound	C50H96NO7P	854.7	Positive	M+H	1	5.2
PC O-42:4	Target Compound	C50H94NO7P	852.684	Positive	M+H	1	5.62
PC O-42:5	Target Compound	C50H92NO7P	850.668	Positive	M+H	1	4.89
PC O-42:6	Target Compound	C50H90NO7P	848.653	Positive	M+H	1	4.75
PC O-42:7	Target Compound	C50H88NO7P	846.637	Positive	M+H	1	4.65
PC O-44:5	Target Compound	C52H96NO7P	878.7	Positive	M+H	1	5.01
PC O-44:6	Target Compound	C52H94NO7P	876.684	Positive	M+H	1	4.8
PC O-44:7	Target Compound	C52H92NO7P	874.668	Positive	M+H	1	4.8
PC O-46:7	Target Compound	C54H96NO7P	902.7	Positive	M+H	1	4.9
PE 15:0/18:1-d7	Internal Standard	D7C38H67NO8P	711.566	Positive	M+H	1	4.62
PG 15:0/18:1-d7	Internal Standard	D7C39H68O10P	759.588	Positive	M+NH4	1	4.03
PI 15:0/18:1-d7	Internal Standard	D7C42H72O13P	847.604	Positive	M+NH4	1	3.91
PS 15:0/18:1-d7	Internal Standard	D7C39H67NO10P	755.556	Positive	M+H	1	4.07
SE 27:1/14:0	Target Compound	C41H72O2	614.587	Positive	M+NH4	1	9.05
SE 27:1/15:0	Target Compound	C42H74O2	628.603	Positive	M+NH4	1	9.25
SE 27:1/16:2	Target Compound	C43H72O2	638.587	Positive	M+NH4	1	8.62
SE 27:1/17:0	Target Compound	C44H78O2	656.634	Positive	M+NH4	1	9.65
SE 27:1/17:1	Target Compound	C44H76O2	654.618	Positive	M+NH4	1	9.3
SE 27:1/18:1	Target Compound	C45H78O2	668.634	Positive	M+NH4	1	9.44
SE 27:1/18:2	Target Compound	C45H76O2	666.618	Positive	M+NH4	1	9.04
SE 27:1/18:3	Target Compound	C45H74O2	664.603	Positive	M+NH4	1	8.61
SE 27:1/20:1	Target Compound	C47H82O2	696.665	Positive	M+NH4	1	9.8
SE 27:1/20:2	Target Compound	C47H80O2	694.65	Positive	M+NH4	1	9.46
SE 27:1/20:3	Target Compound	C47H78O2	692.634	Positive	M+NH4	1	9.08
SE 27:1/20:4	Target Compound	C47H76O2	690.618	Positive	M+NH4	1	8.76
SE 27:1/20:5	Target Compound	C47H74O2	688.603	Positive	M+NH4	1	8.34
SE 27:1/22:4	Target Compound	C49H80O2	718.65	Positive	M+NH4	1	9.14
SE 27:1/22:5	Target Compound	C49H78O2	716.634	Positive	M+NH4	1	8.77
SE 27:1/22:6	Target Compound	C49H76O2	714.618	Positive	M+NH4	1	8.46
SE 27:1/24:6	Target Compound	C51H80O2	742.65	Positive	M+NH4	1	8.9
SM 18:1;2O/18:1-d9	Internal Standard	D9C41H72N2O6P	738.647	Positive	M+H	1	4.36
SM 30:0;2O	Target Compound	C35H73N2O6P	649.528	Positive	M+H	1	3.67
SM 30:1;2O	Target Compound	C35H71N2O6P	647.512	Positive	M+H	1	3.52
SM 32:0;2O	Target Compound	C37H77N2O6P	677.559	Positive	M+H	1	4.03
SM 32:1;2O	Target Compound	C37H75N2O6P	675.544	Positive	M+H	1	3.86
SM 32:2;2O	Target Compound	C37H73N2O6P	673.528	Positive	M+H	1	3.57
SM 33:1;2O	Target Compound	C38H77N2O6P	689.559	Positive	M+H	1	4.06
SM 33:2;2O	Target Compound	C38H75N2O6P	687.544	Positive	M+H	1	3.73
SM 34:0;2O	Target Compound	C39H81N2O6P	705.591	Positive	M+H	1	4.45
SM 34:1;2O	Target Compound	C39H79N2O6P	703.575	Positive	M+H	1	4.25
SM 34:1;3O	Target Compound	C39H79N2O7P	719.57	Positive	M+H	1	4.08
SM 34:2;2O	Target Compound	C39H77N2O6P	701.559	Positive	M+H	1	3.93
SM 35:0;2O	Target Compound	C40H83N2O6P	719.606	Positive	M+H	1	4.66
SM 35:1;2O	Target Compound	C40H81N2O6P	717.591	Positive	M+H	1	4.48
SM 35:2;2O	Target Compound	C40H79N2O6P	715.575	Positive	M+H	1	4.11
SM 36:0;2O	Target Compound	C41H85N2O6P	733.622	Positive	M+H	1	4.92
SM 36:1;2O	Target Compound	C41H83N2O6P	731.606	Positive	M+H	1	4.73
SM 36:2;2O	Target Compound	C41H81N2O6P	729.591	Positive	M+H	1	4.36
SM 36:3;2O	Target Compound	C41H79N2O6P	727.575	Positive	M+H	1	4.03
SM 37:1;2O	Target Compound	C42H85N2O6P	745.622	Positive	M+H	1	5.03
SM 37:2;2O	Target Compound	C42H83N2O6P	743.606	Positive	M+H	1	4.59
SM 38:0;2O	Target Compound	C43H89N2O6P	761.653	Positive	M+H	1	5.51
SM 38:1;2O	Target Compound	C43H87N2O6P	759.637	Positive	M+H	1	5.32
SM 38:2;2O	Target Compound	C43H85N2O6P	757.622	Positive	M+H	1	4.86
SM 38:3;2O	Target Compound	C43H83N2O6P	755.606	Positive	M+H	1	4.38
SM 39:1;2O	Target Compound	C44H89N2O6P	773.653	Positive	M+H	1	5.6
SM 39:2;2O	Target Compound	C44H87N2O6P	771.637	Positive	M+H	1	5.12
SM 40:0;2O	Target Compound	C45H93N2O6P	789.684	Positive	M+H	1	6.03
SM 40:1;2O	Target Compound	C45H91N2O6P	787.669	Positive	M+H	1	5.82
SM 40:2;2O	Target Compound	C45H89N2O6P	785.653	Positive	M+H	1	5.37
SM 40:3;2O	Target Compound	C45H87N2O6P	783.637	Positive	M+H	1	4.86
SM 40:4;2O	Target Compound	C45H85N2O6P	781.622	Positive	M+H	1	4.48
SM 41:0;2O	Target Compound	C46H95N2O6P	803.7	Positive	M+H	1	6.34
SM 41:1;2O	Target Compound	C46H93N2O6P	801.684	Positive	M+H	1	6.12
SM 41:2;2O	Target Compound	C46H91N2O6P	799.669	Positive	M+H	1	5.67
SM 41:3;2O	Target Compound	C46H89N2O6P	797.653	Positive	M+H	1	5.12
SM 42:0;2O	Target Compound	C47H97N2O6P	817.716	Positive	M+H	1	6.65
SM 42:0;3O	Target Compound	C47H97N2O7P	833.711	Positive	M+H	1	6.16
SM 42:1;2O	Target Compound	C47H95N2O6P	815.7	Positive	M+H	1	6.43
SM 42:1;3O	Target Compound	C47H95N2O7P	831.695	Positive	M+H	1	5.57
SM 42:2;2O	Target Compound	C47H93N2O6P	813.684	Positive	M+H	1	5.84
SM 42:3;2O	Target Compound	C47H91N2O6P	811.669	Positive	M+H	1	5.37
SM 42:4;2O	Target Compound	C47H89N2O6P	809.653	Positive	M+H	1	4.92
SM 42:5;2O	Target Compound	C47H87N2O6P	807.637	Positive	M+H	1	4.62
SM 43:1;2O	Target Compound	C48H97N2O6P	829.716	Positive	M+H	1	6.64
SM 43:2;2O	Target Compound	C48H95N2O6P	827.7	Positive	M+H	1	6.05
SM 43:3;2O	Target Compound	C48H93N2O6P	825.684	Positive	M+H	1	5.65
SM 44:1;2O	Target Compound	C49H99N2O6P	843.731	Positive	M+H	1	7.03
SM 44:2;2O	Target Compound	C49H97N2O6P	841.716	Positive	M+H	1	6.38
SM 44:3;2O	Target Compound	C49H95N2O6P	839.7	Positive	M+H	1	5.92
ST 27:1;O	Target Compound	C27H46O	369.352	Positive	M-OH	1	3.96
TG 14:0/16:1/14:0-d5	Internal Standard	C47H83D5O6	771.723	Positive	M+NH4	1	8.35
TG 15:0/18:1-d7/15:0	Internal Standard	D7C51H89O6	829.798	Positive	M+NH4	1	9.19
TG 20:0/20:1/20:0-d5	Internal Standard	C63H115D5O6	995.974	Positive	M+NH4	1	11
TG 24:0	Target Compound	C27H50O6	488.395	Positive	M+NH4	1	3.7
TG 26:0	Target Compound	C29H54O6	516.426	Positive	M+NH4	1	4.1
TG 28:0	Target Compound	C31H58O6	544.457	Positive	M+NH4	1	4.57
TG 34:0	Target Compound	C37H70O6	628.551	Positive	M+NH4	1	6.23
TG 36:1	Target Compound	C39H72O6	654.567	Positive	M+NH4	1	6.33
TG 42:0	Target Compound	C45H86O6	740.676	Positive	M+NH4	1	8.34
TG 42:1	Target Compound	C45H84O6	738.661	Positive	M+NH4	1	7.93
TG 42:2	Target Compound	C45H82O6	736.645	Positive	M+NH4	1	7.49
TG 43:0	Target Compound	C46H88O6	754.692	Positive	M+NH4	1	8.54
TG 44:0	Target Compound	C47H90O6	768.708	Positive	M+NH4	1	8.77
TG 44:1	Target Compound	C47H88O6	766.692	Positive	M+NH4	1	8.4
TG 44:2	Target Compound	C47H86O6	764.676	Positive	M+NH4	1	7.99
TG 44:3	Target Compound	C47H84O6	762.661	Positive	M+NH4	1	7.57
TG 45:0	Target Compound	C48H92O6	782.723	Positive	M+NH4	1	8.95
TG 45:1	Target Compound	C48H90O6	780.708	Positive	M+NH4	1	8.62
TG 46:0	Target Compound	C49H94O6	796.739	Positive	M+NH4	1	9.16
TG 46:1	Target Compound	C49H92O6	794.723	Positive	M+NH4	1	8.82
TG 46:2	Target Compound	C49H90O6	792.708	Positive	M+NH4	1	8.44
TG 46:3	Target Compound	C49H88O6	790.692	Positive	M+NH4	1	8.04
TG 47:0	Target Compound	C50H96O6	810.755	Positive	M+NH4	1	9.35
TG 47:1	Target Compound	C50H94O6	808.739	Positive	M+NH4	1	9.01
TG 47:2	Target Compound	C50H92O6	806.723	Positive	M+NH4	1	8.66
TG 48:0	Target Compound	C51H98O6	824.77	Positive	M+NH4	1	9.53
TG 48:1	Target Compound	C51H96O6	822.755	Positive	M+NH4	1	9.2
TG 48:2	Target Compound	C51H94O6	820.739	Positive	M+NH4	1	8.86
TG 48:3	Target Compound	C51H92O6	818.723	Positive	M+NH4	1	8.48
TG 48:4	Target Compound	C51H90O6	816.708	Positive	M+NH4	1	8.09
TG 49:0	Target Compound	C52H100O6	838.786	Positive	M+NH4	1	9.7
TG 49:1	Target Compound	C52H98O6	836.77	Positive	M+NH4	1	9.39
TG 49:2	Target Compound	C52H96O6	834.755	Positive	M+NH4	1	9.05
TG 49:3	Target Compound	C52H94O6	832.739	Positive	M+NH4	1	8.7
TG 49:4	Target Compound	C52H92O6	830.723	Positive	M+NH4	1	8.43
TG 50:0	Target Compound	C53H102O6	852.801	Positive	M+NH4	1	9.88
TG 50:1	Target Compound	C53H100O6	850.786	Positive	M+NH4	1	9.57
TG 50:2	Target Compound	C53H98O6	848.77	Positive	M+NH4	1	9.25
TG 50:3	Target Compound	C53H96O6	846.755	Positive	M+NH4	1	8.9
TG 50:4	Target Compound	C53H94O6	844.739	Positive	M+NH4	1	8.54
TG 50:5	Target Compound	C53H92O6	842.723	Positive	M+NH4	1	8.15
TG 51:0	Target Compound	C54H104O6	866.817	Positive	M+NH4	1	10.02
TG 51:1	Target Compound	C54H102O6	864.801	Positive	M+NH4	1	9.74
TG 51:2	Target Compound	C54H100O6	862.786	Positive	M+NH4	1	9.45
TG 51:3	Target Compound	C54H98O6	860.77	Positive	M+NH4	1	9.11
TG 51:4	Target Compound	C54H96O6	858.755	Positive	M+NH4	1	8.75
TG 52:0	Target Compound	C55H106O6	880.833	Positive	M+NH4	1	10.17
TG 52:1	Target Compound	C55H104O6	878.817	Positive	M+NH4	1	9.91
TG 52:2	Target Compound	C55H102O6	876.801	Positive	M+NH4	1	9.61
TG 52:3	Target Compound	C55H100O6	874.786	Positive	M+NH4	1	9.29
TG 52:4	Target Compound	C55H98O6	872.77	Positive	M+NH4	1	8.95
TG 52:5	Target Compound	C55H96O6	870.755	Positive	M+NH4	1	8.6
TG 52:6	Target Compound	C55H94O6	868.739	Positive	M+NH4	1	8.35
TG 52:7	Target Compound	C55H92O6	866.723	Positive	M+NH4	1	8.05
TG 53:0	Target Compound	C56H108O6	894.848	Positive	M+NH4	1	10.33
TG 53:1	Target Compound	C56H106O6	892.833	Positive	M+NH4	1	10.06
TG 53:2	Target Compound	C56H104O6	890.817	Positive	M+NH4	1	9.77
TG 53:3	Target Compound	C56H102O6	888.801	Positive	M+NH4	1	9.47
TG 53:4	Target Compound	C56H100O6	886.786	Positive	M+NH4	1	9.1
TG 53:5	Target Compound	C56H98O6	884.77	Positive	M+NH4	1	8.8
TG 54:0	Target Compound	C57H110O6	908.864	Positive	M+NH4	1	10.44
TG 54:1	Target Compound	C57H108O6	906.848	Positive	M+NH4	1	10.23
TG 54:2	Target Compound	C57H106O6	904.833	Positive	M+NH4	1	9.95
TG 54:3	Target Compound	C57H104O6	902.817	Positive	M+NH4	1	9.67
TG 54:4	Target Compound	C57H102O6	900.801	Positive	M+NH4	1	9.33
TG 54:5	Target Compound	C57H100O6	898.786	Positive	M+NH4	1	9.05
TG 54:6	Target Compound	C57H98O6	896.77	Positive	M+NH4	1	8.76
TG 54:7	Target Compound	C57H96O6	894.755	Positive	M+NH4	1	8.46
TG 55:0	Target Compound	C58H112O6	922.88	Positive	M+NH4	1	10.66
TG 55:1	Target Compound	C58H110O6	920.864	Positive	M+NH4	1	10.37
TG 55:2	Target Compound	C58H108O6	918.848	Positive	M+NH4	1	10.1
TG 55:3	Target Compound	C58H106O6	916.833	Positive	M+NH4	1	9.82
TG 55:4	Target Compound	C58H104O6	914.817	Positive	M+NH4	1	9.53
TG 55:5	Target Compound	C58H102O6	912.801	Positive	M+NH4	1	9.28
TG 55:6	Target Compound	C58H100O6	910.786	Positive	M+NH4	1	9
TG 56:0	Target Compound	C59H114O6	936.895	Positive	M+NH4	1	10.79
TG 56:1	Target Compound	C59H112O6	934.88	Positive	M+NH4	1	10.52
TG 56:2	Target Compound	C59H110O6	932.864	Positive	M+NH4	1	10.26
TG 56:3	Target Compound	C59H108O6	930.848	Positive	M+NH4	1	9.98
TG 56:4	Target Compound	C59H106O6	928.833	Positive	M+NH4	1	9.69
TG 56:5	Target Compound	C59H104O6	926.817	Positive	M+NH4	1	9.53
TG 56:6	Target Compound	C59H102O6	924.801	Positive	M+NH4	1	9.2
TG 56:7	Target Compound	C59H100O6	922.786	Positive	M+NH4	1	8.92
TG 56:8	Target Compound	C59H98O6	920.77	Positive	M+NH4	1	8.57
TG 56:9	Target Compound	C59H96O6	918.755	Positive	M+NH4	1	8.21
TG 57:1	Target Compound	C60H114O6	948.895	Positive	M+NH4	1	10.66
TG 57:2	Target Compound	C60H112O6	946.88	Positive	M+NH4	1	10.4
TG 57:3	Target Compound	C60H110O6	944.864	Positive	M+NH4	1	10.13
TG 57:4	Target Compound	C60H108O6	942.848	Positive	M+NH4	1	9.85
TG 58:1	Target Compound	C61H116O6	962.911	Positive	M+NH4	1	10.8
TG 58:10	Target Compound	C61H98O6	944.77	Positive	M+NH4	1	8.4
TG 58:11	Target Compound	C61H96O6	942.755	Positive	M+NH4	1	8
TG 58:2	Target Compound	C61H114O6	960.895	Positive	M+NH4	1	10.55
TG 58:3	Target Compound	C61H112O6	958.88	Positive	M+NH4	1	10.28
TG 58:4	Target Compound	C61H110O6	956.864	Positive	M+NH4	1	10
TG 58:5	Target Compound	C61H108O6	954.848	Positive	M+NH4	1	9.74
TG 58:6	Target Compound	C61H106O6	952.833	Positive	M+NH4	1	9.47
TG 58:7	Target Compound	C61H104O6	950.817	Positive	M+NH4	1	9.17
TG 58:8	Target Compound	C61H102O6	948.801	Positive	M+NH4	1	9
TG 58:9	Target Compound	C61H100O6	946.786	Positive	M+NH4	1	8.66
TG 59:2	Target Compound	C62H116O6	974.911	Positive	M+NH4	1	10.69
TG 59:3	Target Compound	C62H114O6	972.895	Positive	M+NH4	1	10.42
TG 59:4	Target Compound	C62H112O6	970.88	Positive	M+NH4	1	10.15
TG 60:10	Target Compound	C63H102O6	972.801	Positive	M+NH4	1	8.85
TG 60:11	Target Compound	C63H100O6	970.786	Positive	M+NH4	1	8.53
TG 60:12	Target Compound	C63H98O6	968.77	Positive	M+NH4	1	8.2
TG 60:2	Target Compound	C63H118O6	988.927	Positive	M+NH4	1	10.82
TG 60:3	Target Compound	C63H116O6	986.911	Positive	M+NH4	1	10.55
TG 60:4	Target Compound	C63H114O6	984.895	Positive	M+NH4	1	10.29
TG 60:5	Target Compound	C63H112O6	982.88	Positive	M+NH4	1	10.02
TG 60:6	Target Compound	C63H110O6	980.864	Positive	M+NH4	1	9.75
TG 60:7	Target Compound	C63H108O6	978.848	Positive	M+NH4	1	9.59
TG 60:8	Target Compound	C63H106O6	976.833	Positive	M+NH4	1	9.28
TG 62:2	Target Compound	C65H122O6	1016.96	Positive	M+NH4	1	11.07
TG 63:3	Target Compound	C65H120O6	1014.94	Positive	M+NH4	1	10.85
TG 70:3	Target Compound	C73H136O6	1127.07	Positive	M+NH4	1	11.71
TG 72:3	Target Compound	C75H140O6	1155.1	Positive	M+NH4	1	11.93
TG O-50:1	Target Compound	C53H102O5	836.807	Positive	M+NH4	1	10.04
TG O-50:2	Target Compound	C55H104O5	862.822	Positive	M+NH4	1	10.06
TG O-50:3	Target Compound	C55H102O5	860.807	Positive	M+NH4	1	9.78
TG O-52:3	Target Compound	C57H106O5	888.838	Positive	M+NH4	1	10.09
Tributyl citrate	Target Compound	C18H32O7	361.222	Positive	M+H	1	2.47
Ubiquinone-10	Target Compound	C59H90O4	863.691	Positive	M+H	1	8.34
Arachidonic acid-d8	Internal Standard	D8C20H24O2	311.283	Negative	M-H	1	2.89
Cer 18:1;2O/16:0-d7	Internal Standard	D7C34H60NO3	589.554	Negative	M+HCO2	1	4.9
FA 14:0	Target Compound	C14H28O2	227.202	Negative	M-H	1	2.28
FA 15:0	Target Compound	C15H30O2	241.217	Negative	M-H	1	2.49
FA 16:0	Target Compound	C16H32O2	255.233	Negative	M-H	1	3.08
FA 16:1	Target Compound	C16H30O2	253.217	Negative	M-H	1	2.88
FA 17:0	Target Compound	C17H34O2	269.249	Negative	M-H	1	3.23
FA 17:1	Target Compound	C17H32O2	267.233	Negative	M-H	1	3.03
FA 18:0	Target Compound	C18H36O2	283.264	Negative	M-H	1	3.41
FA 18:1	Target Compound	C18H34O2	281.249	Negative	M-H	1	3.14
FA 18:2	Target Compound	C18H32O2	279.233	Negative	M-H	1	2.94
FA 18:3	Target Compound	C18H30O2	277.217	Negative	M-H	1	2.78
FA 18:4	Target Compound	C18H28O2	275.202	Negative	M-H	1	2.64
FA 20:1	Target Compound	C20H38O2	309.28	Negative	M-H	1	3.46
FA 20:2	Target Compound	C20H36O2	307.264	Negative	M-H	1	3.21
FA 20:4	Target Compound	C20H32O2	303.233	Negative	M-H	1	2.89
FA 20:5	Target Compound	C20H30O2	301.217	Negative	M-H	1	2.75
FA 22:4	Target Compound	C22H36O2	331.264	Negative	M-H	1	3.09
FA 22:6	Target Compound	C22H32O2	327.233	Negative	M-H	1	2.83
FA 24:0	Target Compound	C24H48O2	367.358	Negative	M-H	1	5.29
FA 24:1	Target Compound	C24H46O2	365.342	Negative	M-H	1	4.4
LPC 18:1-d7	Internal Standard	D7C26H45NO7P	573.39	Negative	M+HCO2	1	2.65
LPC O-16:0	Target Compound	C24H52NO6P	526.351	Negative	M+HCO2	1	2.69
LPC O-16:0-d4	Internal Standard	D4C24H48NO6P	530.377	Negative	M+HCO2	1	2.69
LPC O-16:1	Target Compound	C24H50NO6P	524.336	Negative	M+HCO2	1	2.69
LPC O-17:1	Target Compound	C25H52NO6P	538.351	Negative	M+HCO2	1	2.76
LPC O-18:0	Target Compound	C26H56NO6P	554.383	Negative	M+HCO2	1	2.89
LPC O-18:1	Target Compound	C26H54NO6P	552.367	Negative	M+HCO2	1	2.76
LPC O-18:2	Target Compound	C26H52NO6P	550.351	Negative	M+HCO2	1	2.72
LPC O-20:0	Target Compound	C28H58NO6P	580.398	Negative	M+HCO2	1	2.93
LPE 16:0	Target Compound	C21H44NO7P	452.278	Negative	M-H	1	2.64
LPE 16:1	Target Compound	C21H42NO7P	450.263	Negative	M-H	1	2.53
LPE 17:0	Target Compound	C22H46NO7P	466.294	Negative	M-H	1	2.73
LPE 17:2	Target Compound	C22H42NO7P	462.263	Negative	M-H	1	2.5
LPE 18:0	Target Compound	C23H48NO7P	480.31	Negative	M-H	1	2.82
LPE 18:1	Target Compound	C23H46NO7P	478.294	Negative	M-H	1	2.69
LPE 18:1-d7	Internal Standard	D7C23H39NO7P	485.338	Negative	M-H	1	2.68
LPE 18:2	Target Compound	C23H44NO7P	476.278	Negative	M-H	1	2.57
LPE 18:3	Target Compound	C23H42NO7P	474.263	Negative	M-H	1	2.47
LPE 20:0	Target Compound	C25H52NO7P	508.341	Negative	M-H	1	3.06
LPE 20:1	Target Compound	C25H50NO7P	506.325	Negative	M-H	1	2.86
LPE 20:2	Target Compound	C25H48NO7P	504.31	Negative	M-H	1	2.74
LPE 20:3	Target Compound	C25H46NO7P	502.294	Negative	M-H	1	2.62
LPE 20:4	Target Compound	C25H44NO7P	500.278	Negative	M-H	1	2.54
LPE 20:5	Target Compound	C25H42NO7P	498.263	Negative	M-H	1	2.45
LPE 22:0	Target Compound	C27H56NO7P	536.372	Negative	M-H	1	3.15
LPE 22:3	Target Compound	C27H50NO7P	530.325	Negative	M-H	1	2.7
LPE 22:4	Target Compound	C27H48NO7P	528.31	Negative	M-H	1	2.68
LPE 22:5	Target Compound	C27H46NO7P	526.294	Negative	M-H	1	2.55
LPE 22:6	Target Compound	C27H44NO7P	524.278	Negative	M-H	1	2.51
LPE 24:0	Target Compound	C29H60NO7P	564.403	Negative	M-H	1	3.29
LPE O-16:1	Target Compound	C21H44NO6P	436.283	Negative	M-H	1	2.73
LPE O-18:1	Target Compound	C23H48NO6P	464.315	Negative	M-H	1	2.95
LPE O-18:2	Target Compound	C23H46NO6P	462.299	Negative	M-H	1	2.76
LPE O-20:1	Target Compound	C25H52NO6P	492.346	Negative	M-H	1	3.21
LPG 16:0	Target Compound	C22H45O9P	483.273	Negative	M-H	1	2.53
LPG 17:1	Internal Standard	C23H45O9P	495.273	Negative	M-H	1	2.49
LPG 18:0	Target Compound	C24H49O9P	511.304	Negative	M-H	1	2.69
LPG 18:1	Target Compound	C24H47O9P	509.288	Negative	M-H	1	2.57
LPG 18:2	Target Compound	C24H45O9P	507.273	Negative	M-H	1	2.47
LPI 16:0	Target Compound	C25H49O12P	571.289	Negative	M-H	1	2.5
LPI 17:1	Internal Standard	C26H49O12P	583.289	Negative	M-H	1	2.46
LPI 18:0	Target Compound	C27H53O12P	599.32	Negative	M-H	1	2.65
LPI 18:1	Target Compound	C27H51O12P	597.305	Negative	M-H	1	2.53
LPI 18:2	Target Compound	C27H49O12P	595.289	Negative	M-H	1	2.44
LPI 20:3	Target Compound	C29H51O12P	621.305	Negative	M-H	1	2.49
LPI 20:4	Target Compound	C29H49O12P	619.289	Negative	M-H	1	2.43
LPS 18:0	Target Compound	C24H48NO9P	524.299	Negative	M-H	1	2.62
LPS 18:1	Target Compound	C24H46NO9P	522.284	Negative	M-H	1	2.45
LPS 20:4	Target Compound	C26H44NO9P	544.268	Negative	M-H	1	2.37
LPS 22:6	Target Compound	C28H44NO9P	568.268	Negative	M-H	1	2.35
NeuAcHex2Cer 34:1;2O	Target Compound	C57H104N2O21	1151.71	Negative	M-H	1	3.69
PA 34:1	Target Compound	C37H71O8P	673.481	Negative	M-H	1	4.61
PA 36:1	Target Compound	C39H75O8P	701.513	Negative	M-H	1	5.14
PA 36:2	Target Compound	C39H73O8P	699.497	Negative	M-H	1	4.7
PC 15:0/18:1-d7	Internal Standard	D7C41H73NO8P	797.604	Negative	M+HCO2	1	4.47
PC 34:1;O	Target Compound	C42H80NO9P	818.555	Negative	M+HCO2	1	3.27
PC 34:2;2O	Target Compound	C42H80NO10P	834.55	Negative	M+HCO2	1	3.23
PC 36:1;O	Target Compound	C44H84NO9P	846.587	Negative	M+HCO2	1	3.6
PC 36:2;O	Target Compound	C44H82NO9P	844.571	Negative	M+HCO2	1	3.38
PC 36:3;2O	Target Compound	C44H80NO10P	858.55	Negative	M+HCO2	1	2.89
PC 36:3;O	Target Compound	C44H80NO9P	842.555	Negative	M+HCO2	1	3.5
PC 38:5;O	Target Compound	C46H80NO9P	866.555	Negative	M+HCO2	1	3.28
PC O-18:0/18:1-d9	Internal Standard	D9C44H77NO7P	825.669	Negative	M+HCO2	1	5.51
PE 15:0/18:1-d7	Internal Standard	D7C38H67NO8P	709.552	Negative	M-H	1	4.63
PE 32:0	Target Compound	C37H74NO8P	690.508	Negative	M-H	1	4.82
PE 32:1	Target Compound	C37H72NO8P	688.492	Negative	M-H	1	4.42
PE 34:1	Target Compound	C39H76NO8P	716.524	Negative	M-H	1	4.9
PE 34:2	Target Compound	C39H74NO8P	714.508	Negative	M-H	1	4.51
PE 34:3	Target Compound	C39H72NO8P	712.492	Negative	M-H	1	4.16
PE 35:2	Target Compound	C40H76NO8P	728.524	Negative	M-H	1	4.74
PE 36:1	Target Compound	C41H80NO8P	744.555	Negative	M-H	1	5.41
PE 36:2	Target Compound	C41H78NO8P	742.539	Negative	M-H	1	4.99
PE 36:3	Target Compound	C41H76NO8P	740.524	Negative	M-H	1	4.59
PE 36:4	Target Compound	C41H74NO8P	738.508	Negative	M-H	1	4.43
PE 36:5	Target Compound	C41H72NO8P	736.492	Negative	M-H	1	4.1
PE 37:4	Target Compound	C42H76NO8P	752.524	Negative	M-H	1	4.66
PE 38:2	Target Compound	C43H82NO8P	770.571	Negative	M-H	1	5.52
PE 38:4	Target Compound	C43H78NO8P	766.539	Negative	M-H	1	4.92
PE 38:6	Target Compound	C43H74NO8P	762.508	Negative	M-H	1	4.27
PE 40:1	Target Compound	C45H88NO8P	800.617	Negative	M-H	1	6.4
PE 40:3	Target Compound	C45H84NO8P	796.586	Negative	M-H	1	5.45
PE 40:4	Target Compound	C45H82NO8P	794.571	Negative	M-H	1	5.16
PE 40:5	Target Compound	C45H80NO8P	792.555	Negative	M-H	1	4.89
PE 40:6	Target Compound	C45H78NO8P	790.539	Negative	M-H	1	4.74
PE 40:7	Target Compound	C45H76NO8P	788.524	Negative	M-H	1	4.36
PE 40:8	Target Compound	C45H74NO8P	786.508	Negative	M-H	1	4.07
PE 41:1	Target Compound	C46H90NO8P	814.633	Negative	M-H	1	6.6
PE 42:1	Target Compound	C47H92NO8P	828.649	Negative	M-H	1	6.89
PE 42:10	Target Compound	C47H74NO8P	810.508	Negative	M-H	1	3.95
PE 42:7	Target Compound	C47H80NO8P	816.555	Negative	M-H	1	4.81
PE 42:8	Target Compound	C47H78NO8P	814.539	Negative	M-H	1	4.23
PE 44:10	Target Compound	C49H78NO8P	838.539	Negative	M-H	1	4.12
PE 44:11	Target Compound	C49H76NO8P	836.524	Negative	M-H	1	3.83
PE O-16:1_16:0	Target Compound	C37H74NO7P	674.513	Negative	M-H	1	5.15
PE O-16:1_18:1	Target Compound	C39H76NO7P	700.529	Negative	M-H	1	5.26
PE O-16:1_18:2	Target Compound	C39H74NO7P	698.513	Negative	M-H	1	4.8
PE O-16:1_20:4	Target Compound	C41H74NO7P	722.513	Negative	M-H	1	4.71
PE O-16:1_22:6	Target Compound	C43H74NO7P	746.513	Negative	M-H	1	4.54
PE O-18:1_16:0	Target Compound	C39H78NO7P	702.544	Negative	M-H	1	5.67
PE O-18:1_18:1	Target Compound	C41H80NO7P	728.56	Negative	M-H	1	5.77
PE O-18:1_18:2	Target Compound	C41H78NO7P	726.544	Negative	M-H	1	5.32
PE O-18:1_20:4	Target Compound	C43H78NO7P	750.544	Negative	M-H	1	5.24
PE O-18:1_22:6	Target Compound	C45H78NO7P	774.544	Negative	M-H	1	5.06
PE O-18:2_14:0	Target Compound	C37H72NO7P	672.497	Negative	M-H	1	4.74
PE O-18:2_18:2	Target Compound	C41H76NO7P	724.529	Negative	M-H	1	4.89
PE O-18:2_20:4	Target Compound	C43H76NO7P	748.529	Negative	M-H	1	4.81
PE O-35:2	Target Compound	C40H78NO7P	714.544	Negative	M-H	1	5.52
PE O-35:3	Target Compound	C40H76NO7P	712.529	Negative	M-H	1	5.05
PE O-36:1	Target Compound	C41H82NO7P	730.576	Negative	M-H	1	5.84
PE O-36:6	Target Compound	C41H72NO7P	720.497	Negative	M-H	1	4.35
PE O-38:1	Target Compound	C43H86NO7P	758.607	Negative	M-H	1	6.24
PE O-38:2	Target Compound	C43H84NO7P	756.591	Negative	M-H	1	6.3
PE O-38:3	Target Compound	C43H82NO7P	754.576	Negative	M-H	1	5.9
PE O-38:4	Target Compound	C43H80NO7P	752.56	Negative	M-H	1	5.45
PE O-40:2	Target Compound	C45H88NO7P	784.623	Negative	M-H	1	6.85
PE O-40:3	Target Compound	C45H86NO7P	782.607	Negative	M-H	1	6.34
PE O-40:5	Target Compound	C45H82NO7P	778.576	Negative	M-H	1	5.79
PE O-40:6	Target Compound	C45H80NO7P	776.56	Negative	M-H	1	5.24
PE O-40:8	Target Compound	C45H76NO7P	772.529	Negative	M-H	1	4.58
PE O-42:3	Target Compound	C47H90NO7P	810.638	Negative	M-H	1	6.91
PE O-42:5	Target Compound	C47H86NO7P	806.607	Negative	M-H	1	6.38
PE O-42:6	Target Compound	C47H84NO7P	804.591	Negative	M-H	1	5.76
PG 15:0/18:1-d7	Internal Standard	D7C39H68O10P	740.546	Negative	M-H	1	4
PG 30:0	Target Compound	C36H71O10P	693.471	Negative	M-H	1	3.7
PG 32:0	Target Compound	C38H75O10P	721.503	Negative	M-H	1	4.07
PG 32:1	Target Compound	C38H73O10P	719.487	Negative	M-H	1	3.87
PG 34:1	Target Compound	C40H77O10P	747.518	Negative	M-H	1	4.52
PG 34:2	Target Compound	C40H75O10P	745.503	Negative	M-H	1	3.95
PG 36:1	Target Compound	C42H81O10P	775.549	Negative	M-H	1	5.02
PG 36:2	Target Compound	C42H79O10P	773.534	Negative	M-H	1	4.6
PG 36:3	Target Compound	C42H77O10P	771.518	Negative	M-H	1	4.23
PG 36:4	Target Compound	C42H75O10P	769.503	Negative	M-H	1	3.84
PG 38:4	Target Compound	C44H79O10P	797.534	Negative	M-H	1	4.23
PG 38:5	Target Compound	C44H77O10P	795.518	Negative	M-H	1	3.76
PG 38:6	Target Compound	C44H75O10P	793.503	Negative	M-H	1	3.5
PG 40:6	Target Compound	C46H79O10P	821.534	Negative	M-H	1	3.95
PG 40:7	Target Compound	C46H77O10P	819.518	Negative	M-H	1	3.65
PG 40:8	Target Compound	C46H75O10P	817.503	Negative	M-H	1	3.46
PI 15:0/18:1-d7	Internal Standard	D7C42H72O13P	828.562	Negative	M-H	1	3.94
PI 32:0	Target Compound	C41H79O13P	809.519	Negative	M-H	1	4.04
PI 32:1	Target Compound	C41H77O13P	807.503	Negative	M-H	1	3.78
PI 33:1	Target Compound	C42H79O13P	821.519	Negative	M-H	1	3.95
PI 34:0	Target Compound	C43H83O13P	837.55	Negative	M-H	1	4.43
PI 34:1	Target Compound	C43H81O13P	835.534	Negative	M-H	1	4.12
PI 34:2	Target Compound	C43H79O13P	833.519	Negative	M-H	1	3.83
PI 35:1	Target Compound	C44H83O13P	849.55	Negative	M-H	1	4.31
PI 35:2	Target Compound	C44H81O13P	847.534	Negative	M-H	1	4.01
PI 36:1	Target Compound	C45H85O13P	863.566	Negative	M-H	1	4.54
PI 36:2	Target Compound	C45H83O13P	861.55	Negative	M-H	1	4.21
PI 36:3	Target Compound	C45H81O13P	859.534	Negative	M-H	1	3.93
PI 36:4	Target Compound	C45H79O13P	857.519	Negative	M-H	1	3.79
PI 36:5	Target Compound	C45H77O13P	855.503	Negative	M-H	1	3.55
PI 37:4	Target Compound	C46H81O13P	871.534	Negative	M-H	1	3.97
PI 38:3	Target Compound	C47H85O13P	887.566	Negative	M-H	1	4.31
PI 38:4	Target Compound	C47H83O13P	885.55	Negative	M-H	1	4.17
PI 38:5	Target Compound	C47H81O13P	883.534	Negative	M-H	1	3.87
PI 38:6	Target Compound	C47H79O13P	881.519	Negative	M-H	1	3.68
PI 40:5	Target Compound	C49H85O13P	911.566	Negative	M-H	1	4.14
PI 40:6	Target Compound	C49H83O13P	909.55	Negative	M-H	1	4.02
PI O-18:1_20:4	Target Compound	C47H83O12P	869.555	Negative	M-H	1	4.12
PS 15:0/18:1-d7	Internal Standard	D7C39H67NO10P	753.542	Negative	M-H	1	3.99
PS 34:1	Target Compound	C40 H76 N O10 P	760.513	Negative	M-H	1	4.17
PS 36:1	Target Compound	C42H80NO10P	788.545	Negative	M-H	1	4.59
PS 36:2	Target Compound	C42H78NO10P	786.529	Negative	M-H	1	4.27
PS 36:4	Target Compound	C42 H74 N O10 P	782.498	Negative	M-H	1	3.84
PS 38:1	Target Compound	C44 H84 N O10 P	816.576	Negative	M-H	1	5.02
PS 38:2	Target Compound	C44H82NO10P	814.56	Negative	M-H	1	4.71
PS 38:3	Target Compound	C44 H80 N O10 P	812.545	Negative	M-H	1	4.39
PS 38:4	Target Compound	C44 H78 N O10 P	810.529	Negative	M-H	1	4.22
PS 38:5	Target Compound	C44 H76 N O10 P	808.513	Negative	M-H	1	3.92
PS 38:6	Target Compound	C44H74NO10P	806.498	Negative	M-H	1	3.72
PS 40:1	Target Compound	C46H88NO10P	844.607	Negative	M-H	1	5.64
PS 40:2	Target Compound	C46H86NO10P	842.592	Negative	M-H	1	5.1
PS 40:4	Target Compound	C46 H82 N O10 P	838.56	Negative	M-H	1	4.5
PS 40:5	Target Compound	C46 H80 N O10 P	836.545	Negative	M-H	1	4.36
PS 40:6	Target Compound	C46 H78 N O10 P	834.529	Negative	M-H	1	4.06
PS 40:7	Target Compound	C46 H76 N O10 P	832.513	Negative	M-H	1	3.77
PS 42:1	Target Compound	C48H92NO10P	872.639	Negative	M-H	1	6.4
PS 42:2	Target Compound	C48H90NO10P	870.623	Negative	M-H	1	5.69
PS 44:10	Target Compound	C50 H78 N O10 P	882.529	Negative	M-H	1	3.66
PS 44:12	Target Compound	C50 H74 N O10 P	878.498	Negative	M-H	1	3.31
SHexCer 36:1;2O	Target Compound	C42H81NO11S	806.546	Negative	M-H	1	4.16
SHexCer 36:1;3O	Target Compound	C42H81NO12S	822.541	Negative	M-H	1	4.05
SHexCer 38:1;2O	Target Compound	C44H85NO11S	834.577	Negative	M-H	1	4.6
SHexCer 38:1;3O	Target Compound	C44H85NO12S	850.572	Negative	M-H	1	4.48
SHexCer 40:1;2O	Target Compound	C46H89NO11S	862.608	Negative	M-H	1	5.07
SHexCer 40:1;3O	Target Compound	C46H89NO12S	878.603	Negative	M-H	1	4.96
SHexCer 40:2;2O	Target Compound	C46H87NO11S	860.593	Negative	M-H	1	4.61
SHexCer 41:1;3O	Target Compound	C47H91NO12S	892.619	Negative	M-H	1	5.24
SHexCer 42:0;2O	Target Compound	C48H95NO11S	892.655	Negative	M-H	1	5.9
SHexCer 42:1;2O	Target Compound	C48H93NO11S	890.64	Negative	M-H	1	5.62
SHexCer 42:2;2O	Target Compound	C48H91NO11S	888.624	Negative	M-H	1	5.05
SHexCer 42:2;3O	Target Compound	C48H91NO12S	904.619	Negative	M-H	1	5
SHexCer 42:3;2O	Target Compound	C48H89NO11S	886.608	Negative	M-H	1	4.64
SHexCer 44:2;2O	Target Compound	C50H95NO11S	916.655	Negative	M-H	1	5.6
SM 18:1;2O/18:1-d9	Internal Standard	D9C41H72N2O6P	782.638	Negative	M+HCO2	1	4.35
ST 19:2;2O;S	Target Compound	C19H28O5S	367.158	Negative	M-H	1	1.72
ST 19:2;3O;S	Target Compound	C19H28O6S	383.153	Negative	M-H	1	1.11
ST 27:1;O;S	Target Compound	C27H46O4S	465.304	Negative	M-H	1	2.88
Thyroxin	Target Compound	C15H11I4NO4	775.679	Negative	M-H	1	1.88

## Sheet: Method parameters-Oxylipins
LC parameters
Solvents
A	Water + 0.0025% formic acid
B	Acetonitrile + 0.0025% formic acid
Gradient Elution
Time [min]	A [%]	B [%]	Flowrate [mL/min]
0	75	25	0.45
7	15	85	0.45
7.2	15	85	0.45
7.21	0	100	0.45
9	0	100	0.45
9.51	90	10	0.45
10.5	75	25	0.45
10.51	75	25	0.45
13	75	25	0.45
MS parameters
Parameters	Value
Temperature (TEM)	550 °C
Curtain Gas (CUR)	45
Collision Gas (CAD)	Medium
IonSpray Voltage (ISV)	-4500 V
Ion Source Gas 1 (GS1)	70
Ion Source Gas 2 (GS2)	50
Settings for multiple reaction monitoring (MRM)
Analyte	Q1	Q3	Retention time	DP	EP	CXP	CE
	[m/z]	[m/z]	[min]	[V]	[V]	[V]	[V]
5,6-EpETrE 1	319.2	191.1	6.59	-70	-10	-15	-14
5,6-EpETrE 2	319.2	83.1	6.59	-70	-10	-9	-20
8,9-EpETrE 1	319.2	167	6.44	-80	-10	-11	-16
8,9-EpETrE 2	319.2	155	6.51	-80	-10	-13	-16
11,12-EpETrE 1	319.2	167	6.43	-75	-10	-11	-18
11,12-EpETrE 2	319.2	179	6.43	-75	-10	-15	-16
14,15-EpETrE 1	319.2	219.1	6.25	-100	-10	-18	-14
14,15-EpETrE 2	319.2	175.1	6.24	-100	-10	-11	-16
8,9-EpETE 1	317.2	155	5.95	-75	-10	-9	-14
8,9-EpETE 2	317.2	167.1	5.94	-75	-10	-11	-16
17,18-EpETE 1	317.2	259.2	5.69	-100	-10	-9	-14
17,18-EpETE 2	317.2	215.2	5.69	-100	-10	-15	-16
14,15-EpETE 1	317.2	207.2	5.84	-65	-10	-11	-16
14,15-EpETE 2	317.2	219.1	5.84	-65	-10	-17	-14
10,11-EpDPA 1	343.2	153	6.38	-60	-10	-11	-16
10,11-EpDPA 2	343.2	121.1	6.37	-60	-10	-9	-18
13,14-EpDPA 1	343.2	192.9	6.32	-65	-10	-13	-16
13,14-EpDPA 2	343.2	234.1	6.32	-65	-10	-7	-16
16,17-EpDPA 1	343.2	233.1	6.28	-75	-10	-7	-16
16,17-EpDPA 2	343.2	274.1	6.28	-75	-10	-15	-14
19,20-EpDPA 1	343.2	299.2	6.14	-110	-10	-11	-16
19,20-EpDPA 2	343.2	241.1	6.14	-110	-10	-17	-16
9,10-EpOME 1	295.2	171	6.28	-110	-10	-11	-22
9,10-EpOME 2	295.2	123.1	6.28	-110	-10	-9	-20
12,13-EpOME 1	295.2	195.1	6.19	-110	-10	-11	-22
12,13-EpOME 2	295.2	113.2	6.2	-110	-10	-13	-26
5S-HETE 1	319.2	115	6.09	-95	-10	-11	-18
5S-HETE 2	319.2	257.1	6.08	-95	-10	-23	-18
8-HETE 1	319.2	155	5.9	-85	-10	-11	-20
8-HETE 2	319.2	163.1	5.9	-85	-10	-11	-24
9-HETE 1	319.2	151.1	5.98	-105	-10	-11	-20
9-HETE 2	319.2	123.1	5.98	-105	-10	-9	-22
11-HETE 1	319.2	167	5.79	-90	-10	-11	-22
11-HETE 2	319.2	149	5.78	-90	-10	-11	-28
12S-HETE 1	319.2	179.1	5.8	-50	-10	-7	-20
12S-HETE 2	319.2	208.1	5.8	-50	-10	-15	-20
15S-HETE 1	319.2	175.1	5.59	-50	-10	-13	-20
15S-HETE 2	319.2	257.2	5.59	-50	-10	-13	-20
20-HETE 1	319.2	289.2	5.22	-115	-10	-21	-22
20-HETE 2	319.2	245.1	5.22	-115	-10	-16	-38
12S-HHTrE 1	279.2	179.1	4.75	-70	-10	-11	-18
12S-HHTrE 2	279.2	135.1	4.75	-70	-10	-9	-18
5-HEPE 1	317.2	115.1	5.53	-65	-10	-9	-18
5-HEPE 2	317.2	201.1	5.53	-65	-10	-19	-20
8-HEPE 1	317.2	155	5.35	-80	-10	-11	-18
8-HEPE 2	317.2	127.1	5.35	-80	-10	-11	-24
9-HEPE 1	317.2	167	5.42	-95	-10	-11	-18
9-HEPE 2	317.2	149.1	5.42	-95	-10	-11	-20
11-HEPE 1	317.2	167.1	5.27	-70	-10	-11	-20
11-HEPE 2	317.2	195.1	5.27	-70	-10	-13	-18
12-HEPE 1	317.2	179.1	5.35	-90	-10	-13	-18
12-HEPE 2	317.2	208.1	5.35	-90	-10	-15	-18
15-HEPE 1	317.2	219.1	5.23	-65	-10	-13	-18
15-HEPE 2	317.2	175	5.23	-65	-10	-17	-20
18-HEPE 1	317.2	259.1	5.07	-90	-10	-21	-16
18-HEPE 2	317.2	215.1	5.08	-90	-10	-15	-18
20-HEPE 1	317.2	243.2	4.93	-105	-10	-7	-20
20-HEPE 2	317.2	287.2	4.93	-105	-10	-19	-20
8-HDHA 1	343.2	189.2	5.98	-80	-10	-11	-16
8-HDHA 2	343.2	109.1	5.98	-80	-10	-9	-18
11-HDHA 1	343.2	121.1	5.87	-75	-10	-9	-20
11-HDHA 2	343.2	149.1	5.87	-75	-10	-9	-18
13-HDHA 1	343.2	193	5.73	-85	-10	-15	-18
13-HDHA 2	343.2	221	5.73	-85	-10	-19	-18
14S-HDHA 1	343.2	205.2	5.78	-30	-10	-13	-18
14S-HDHA 2	343.2	161.1	5.78	-30	-10	-11	-20
16-HDHA 1	343.2	189.2	5.65	-70	-10	-15	-22
16-HDHA 2	343.2	233.2	5.65	-70	-10	-15	-18
17R-HDHA 1	343.2	244.9	5.68	-45	-10	-23	-18
17R-HDHA 2	343.2	201	5.68	-45	-10	-55	-18
20-HDHA 1	343.2	241.2	5.54	-85	-10	-9	-18
20-HDHA 2	343.2	285.2	5.54	-85	-10	-23	-16
22-HDHA 1	343.2	281.2	5.4	-100	-10	-11	-18
22-HDHA 2	343.2	269.2	5.4	-100	-10	-9	-20
9S-HOTrE 1	293.2	275.2	5.02	-55	-10	-19	-18
9S-HOTrE 2	293.2	171	5.02	-55	-10	-11	-20
13S-HOTrE 1	293.2	195.1	5	-100	-10	-11	-24
13S-HOTrE 2	293.2	205.1	5	-100	-10	-11	-50
9-HODE 1	295.2	123.1	5.55	-100	-10	-9	-20
9-HODE 2	295.2	171	5.55	-100	-10	-11	-22
13-HODE 1	295.2	195.1	5.5	-110	-10	-11	-22
13-HODE 2	295.2	113	5.49	-110	-10	-11	-28
5S-HETrE 1	321.3	115	6.68	-95	-10	-7	-18
5S-HETrE 2	321.3	205.1	6.68	-95	-10	-13	-22
15S-HETrE 1	321.3	221.1	5.93	-100	-10	-17	-22
15S-HETrE 2	321.3	259.2	5.92	-100	-10	-21	-24
5,6-DiHETrE 1	337.2	145.1	5.31	-105	-10	-17	-24
5,6-DiHETrE 2	337.2	191.3	5.31	-105	-10	-15	-24
8,9-DiHETrE 1	337.2	127	5.07	-105	-10	-13	-28
8,9-DiHETrE 2	337.2	185.1	5.07	-105	-10	-13	-22
11,12-DiHETrE 1	337.2	167.2	4.89	-105	-10	-11	-24
11,12-DiHETrE 2	337.2	169.2	4.89	-105	-10	-13	-24
14,15-DiHETrE 1	337.2	207.2	4.69	-105	-10	-17	-22
14,15-DiHETrE 2	337.2	129.1	4.69	-105	-10	-11	-24
8,9-DiHETE 1	335.2	127.1	4.52	-90	-10	-9	-26
8,9-DiHETE 2	335.2	185	4.52	-90	-10	-13	-22
11,12-DiHETE 1	335.2	167.1	4.4	-90	-10	-11	-24
11,12-DiHETE 2	335.2	197	4.39	-90	-10	-13	-24
14,15-DiHETE 1	335.2	207	4.32	-90	-10	-13	-24
14,15-DiHETE 2	335.2	129	4.32	-90	-10	-15	-30
17,18-DiHETE 1	335.2	247.1	4.17	-80	-10	-15	-22
17,18-DiHETE 2	335.2	87.1	4.17	-80	-10	-11	-24
7,8-DiHDPA 1	361.2	113.1	5.2	-100	-10	-7	-24
7,8-DiHDPA 2	361.2	127	5.21	-100	-10	-9	-22
10,11-DiHDPA 1	361.2	153	5	-85	-10	-13	-24
10,11-DiHDPA 2	361.2	149.1	5	-85	-10	-9	-24
13,14-DiHDPA 1	361.2	193.1	4.89	-95	-10	-11	-22
13,14-DiHDPA 2	361.2	223.1	4.89	-95	-10	-15	-22
16,17-DiHDPA 1	361.2	233.1	4.82	-85	-10	-13	-22
16,17-DiHDPA 2	361.2	291.1	4.81	-85	-10	-19	-22
19,20-DiHDPA 1	361.2	273.1	4.68	-80	-10	-19	-22
19,20-DiHDPA 2	361.2	87	4.68	-80	-10	-11	-24
9,10-DiHOME 1	313.2	201.1	4.57	-110	-10	-13	-28
9,10-DiHOME 2	313.2	171	4.57	-110	-10	-11	-32
12,13-DiHOME 1	313.2	183.1	4.42	-100	-10	-13	-28
12,13-DiHOME 2	313.2	129.1	4.42	-100	-10	-9	-28
9,10-Dihydroxystearinsäure 1	315.3	141.1	5.09	-125	-10	-9	-38
9,10-Dihydroxystearinsäure 2	315.3	171	5.09	-125	-10	-11	-36
8S,15S-DiHETE 1	335.2	235.1	4.07	-80	-10	-13	-20
8S,15S-DiHETE 1	335.2	155	4.07	-80	-10	-11	-22
PGE2 1	351.2	315	2.88	-40	-10	-37	-16
PGE2 2	351.2	271.1	2.88	-40	-10	-39	-24
PGD2 1	351.2	315	3.02	-40	-10	-37	-16
PGD2 2	351.2	271.1	3.02	-40	-10	-39	-24
TXB2 1	369.2	169.1	2.51	-55	-10	-19	-22
TXB2 2	369.2	195	2.51	-55	-10	-21	-18
PGF2alpha 1	353.2	309	2.78	-85	-10	-31	-26
PGF2alpha 2	353.2	193	2.78	-85	-10	-11	-32
6-keto PGF1alpha 1	369.2	163	2	-40	-10	-17	-36
6-keto PGF1alpha 2	369.2	245.1	2	-40	-10	-25	-34
5S,15S-DiHETE 1	335.2	115	4.19	-50	-10	-11	-16
5S,15S-DiHETE 2	335.2	201	4.19	-50	-10	-14	-25
5,6-EpETrE-d11 1	330.21	202.2	6.54	-75	-10	-13	-16
5,6-EpETrE-d11 2	330.21	148.2	6.54	-75	-10	-11	-18
8,9-EpETrE-d11 1	330.211	155	6.45	-65	-10	-9	-16
8,9-EpETrE-d11 2	330.211	69	6.45	-65	-10	-9	-22
11,12-EpETrE-d11 1	330.214	167	6.38	-75	-10	-21	-18
11,12-EpETrE-d11 2	330.214	179.1	6.37	-75	-10	-11	-18
14,15-EpETre-d11 1	330.216	219	6.19	-95	-10	-17	-16
14,15-EpETre-d11 2	330.216	175.1	6.19	-95	-10	-13	-18
9,10-EpOME-d4 1	299.084	172	6.25	-95	-10	-13	-22
9,10-EpOME-d4 2	299.084	280.2	6.25	-95	-10	-17	-22
12,13-EpOME-d4 1	299.138	198.1	6.16	-95	-10	-13	-22
12,13-EpOME-d4 2	299.084	280.2	6.16	-95	-10	-17	-22
5-HETE-d8 1	327.2	116	6.03	-50	-10	-7	-20
5-HETE-d8 2	327.2	309.3	6.03	-50	-10	-15	-16
12-HETE-d8 1	327.2	184.2	5.82	-50	-10	-17	-22
12-HETE-d8 2	327.2	214.1	5.82	-50	-10	-13	-20
15-HETE-d8 1	327.2	226.2	5.59	-50	-10	-3	-18
15-HETE-d8 2	327.2	182	5.59	-50	-10	-25	-22
20-HETE-d6 1	325.2	281.1	5.17	-50	-10	-25	-22
20-HETE-d6 2	325.2	251.3	5.17	-50	-10	-11	-24
15-HEPE-d5 1	322.2	168	5.2	-50	-10	-12	-15
15-HEPE-d5 2	322.2	180	5.2	-50	-10	-15	-19
17-HDHA-d5 1	348.2	201	5.65	-50	-10	-10	-19
17-HDHA-d5 2	348.2	286	5.65	-50	-10	-12	-17
9S-HODE-d4 1	299.084	172	5.52	-95	-10	-13	-22
9S-HODE-d4 2	299.122	281.2	5.51	-95	-10	-19	-24
13S-HODE-d4 1	299.151	280.8	5.51	-110	-10	-21	-26
13S-HODE-d4 2	299.138	198.1	5.46	-110	-10	-13	-22
8,9-DiHETrE-d11 1	348.226	127.1	5.02	-95	-10	-15	-28
8,9-DiHETrE-d11 2	348.226	184.9	5.02	-95	-10	-11	-24
11,12-DiHETrE-d11 1	348.23	167	4.85	-65	-10	-13	-26
11,12-DiHETrE-d11 2	348.23	180.2	4.84	-65	-10	-13	-26
14,15-DiHETrE-d11 1	348.245	207	4.7	-70	-10	-15	-24
14,15-DiHETrE-d11 2	348.245	140.2	4.7	-70	-10	-9	-26
9,10-DiHOME-d4 1	317.156	203	4.54	-80	-10	-17	-28
9,10-DiHOME-d4 2	317.156	172	4.54	-80	-10	-11	-30
12,13-DiHOME-d4 1	317.15	185.1	4.39	-85	-10	-11	-30
12,13-DiHOME-d4 2	317.15	131	4.39	-85	-10	-7	-28
PGF2alpha-d4 1	357.1	313.2	2.76	-85	-10	-11	-28
PGF2alpha-d4 2	357.1	197	2.76	-85	-10	-25	-36
PGE2-d4 1	355.2	319.1	2.86	-40	-10	-33	-16
PGE2-d4 2	355.2	275.1	2.85	-40	-10	-19	-24
6-keto-PGF1alpha-d4 1	373.2	167.3	1.98	-40	-10	-8	-37
6-keto-PGF1alpha-d4 2	373.2	249.4	1.98	-40	-10	-10	-39
PGD2-d4 1	355.2	319.1	3	-40	-10	-33	-16
PGD2-d4 2	355.2	275.1	3	-40	-10	-19	-24
TXB2-d4 1	373.2	173	2.5	-55	-10	-9	-28
TXB2-d4 2	373.2	199	2.49	-55	-10	-17	-22
7-HDHA 1	343.235	281.3	5.93	-65	-10	-23	-16
7-HDHA 2	343.235	141	5.93	-65	-10	-9	-16
9-HETE-d8 1	327.285	155.1	5.9	-80	-10	-17	-20
9-HETE-d8 1	327.285	184.1	5.9	-80	-10	-9	-20
11-HETE-d8 1	327.285	171.1	5.7	-60	-10	-9	-22
11-HETE-d8 3	327.285	281.3	5.7	-60	-10	-19	-46
11-HETE-d8 4	327.285	184.9	5.7	-60	-10	-15	-76
Standards and quality controls (STDs, QCs)
	Concentration of standard/QC working solution [ng/mL]																						Volume of working solution [µL]	Volume of PBS [µL]	Concentration related to sample [ng/mL]
	Category A	Category B	Category C	Category D	Category E		Category A Analyten		Category B Analyten		Category C Analyten		Category D Analyten												Category A	Category B	Category C	Category D	Category E
STD1	0.25	0.75	1.5	4.5	0.5		PGE2 MaxSpec®		5(S)-HETE		(±)9(10)-EpOME MaxSpec®		9(S)-HODE MaxSpec®										20	200	0.025	0.075	0.15	0.45	0.02
STD2	0.5	1.5	3	9	1		PGD2 MaxSpec®		(±)8-HETE		(±)12(13)-EpOME MaxSpec®		(±)13-HODE MaxSpec®										20	200	0.05	0.15	0.3	0.9	0.04
STD3	1	3	6	18	2.5		TXB2 MaxSpec®		(±)9-HETE		9(S)-HOTrE		9,10-Dihydroxystearinsäure										20	200	0.1	0.3	0.6	1.8	0.1
STD4	2	6	12	36	5		(±)8(9)-EpETE		(±)11-HETE		13(S)-HOTrE												20	200	0.2	0.6	1.2	3.6	0.2
STD5	5	15	30	90	15		(±)17(18)-EpETE MaxSpec®		(±)12-HETE		8(9)-DiHETE												20	200	0.5	1.5	3	9	0.6
STD6	10	30	60	180	50		(±)14(15)-EpETE		(±)15-HETE		11(12)-DiHETE												20	200	1	3	6	18	2
STD7	20	60	120	360	100		(±)10(11)-EpDPA		20-HETE		(±)14(15)-DiHETE												20	200	2	6	12	36	4
STD8	40	120	240	720	200		(±)13(14)-EpDPA		7-HDHA		(±)17(18)-DiHETE												20	200	4	12	24	72	8
STD9	80	240	480	1440	400		(±)16(17)-EpDPA MaxSpec®		(±)8-HDHA		(±)9(10)-DiHOME MaxSpec®												20	200	8	24	48	144	16
STD10	100	300	600	1800	500		(±)19(20)-EpDPA MaxSpec®		(±)11-HDHA		(±)12(13)-DiHOME MaxSpec®												20	200	10	30	60	180	20
LLQC	0.75	2.25	4.5	13.5	1.5		(±)5(6)-DiHETrE		(±)13-HDHA														20	200	0.075	0.225	0.45	1.35	0.06
LQC	3	9	18	54	7.5		(±)8(9)-DiHETrE		14(S)-HDHA														20	200	0.3	0.9	1.8	5.4	0.3
MQC	30	90	180	540	190		(±)11(12)-DiHETrE		(±)16-HDHA														20	200	3	9	18	54	7.6
HQC	75	225	450	1350	380		(±)14(15)-DiHETrE		(±)17-HDHA MaxSpec®														20	200	7.5	22.5	45	135	15.2
							7(8)-DiHDPA		(±)20-HDHA
							10(11)-DiHDPA		22-HDHA
							13(14)-DiHDPA		(±)5(6)-EpETrE
							(±)16(17)-DiHDPA MaxSpec®		(±)8(9)-EpETrE MaxSpec®
							(±)19(20)-DiHDPA MaxSpec®		(±)11(12)-EpETrE MaxSpec®
									(±)14(15)-EpETrE MaxSpec®
									8(S),15(S)-DiHETE
									5(S),15(S)-DiHETE
									PGF2alpha MaxSpec®
									6-keto PGF1alpha MaxSpec®
									12(S)-HHTrE
									5(S)-HETrE
									15(S)-HETrE
									(±)5-HEPE
									(±)8-HEPE
									(±)9-HEPE
									(±)11-HEPE
									(±)12-HEPE
									(±)15-HEPE
									(±)18-HEPE
									20-HEPE
Purchasing
Reference compound	Vendor
PGE2 MaxSpec®	Cayman Chemicals
PGD2 MaxSpec®	Cayman Chemicals
TXB2 MaxSpec®	Cayman Chemicals
(±)8(9)-EpETE	Cayman Chemicals
(±)17(18)-EpETE MaxSpec®	Cayman Chemicals
(±)14(15)-EpETE	Cayman Chemicals
(±)10(11)-EpDPA	Cayman Chemicals
(±)13(14)-EpDPA	Cayman Chemicals
(±)16(17)-EpDPA MaxSpec®	Cayman Chemicals
(±)19(20)-EpDPA MaxSpec®	Cayman Chemicals
(±)5(6)-DiHETrE	Cayman Chemicals
(±)8(9)-DiHETrE	Cayman Chemicals
(±)11(12)-DiHETrE	Cayman Chemicals
(±)14(15)-DiHETrE	Cayman Chemicals
7(8)-DiHDPA	Cayman Chemicals
10(11)-DiHDPA	Cayman Chemicals
13(14)-DiHDPA	Cayman Chemicals
(±)16(17)-DiHDPA MaxSpec®	Cayman Chemicals
(±)19(20)-DiHDPA MaxSpec®	Cayman Chemicals
5(S)-HETE	Cayman Chemicals
(±)8-HETE	Cayman Chemicals
(±)9-HETE	Cayman Chemicals
(±)11-HETE	Cayman Chemicals
(±)12-HETE	Cayman Chemicals
(±)15-HETE	Cayman Chemicals
20-HETE	Cayman Chemicals
7-HDHA	Cayman Chemicals
(±)8-HDHA	Cayman Chemicals
(±)11-HDHA	Cayman Chemicals
(±)13-HDHA	Cayman Chemicals
14(S)-HDHA	Cayman Chemicals
(±)16-HDHA	Cayman Chemicals
(±)17-HDHA MaxSpec®	Cayman Chemicals
(±)20-HDHA	Cayman Chemicals
22-HDHA	Cayman Chemicals
(±)5(6)-EpETrE	Cayman Chemicals
(±)8(9)-EpETrE MaxSpec®	Cayman Chemicals
(±)11(12)-EpETrE MaxSpec®	Cayman Chemicals
(±)14(15)-EpETrE MaxSpec®	Cayman Chemicals
8(S),15(S)-DiHETE	Cayman Chemicals
5(S),15(S)-DiHETE	Cayman Chemicals
PGF2alpha MaxSpec®	Cayman Chemicals
6-keto PGF1alpha MaxSpec®	Cayman Chemicals
12(S)-HHTrE	Cayman Chemicals
5(S)-HETrE	Cayman Chemicals
15(S)-HETrE	Cayman Chemicals
(±)5-HEPE	Cayman Chemicals
(±)8-HEPE	Cayman Chemicals
(±)9-HEPE	Cayman Chemicals
(±)11-HEPE	Cayman Chemicals
(±)12-HEPE	Cayman Chemicals
(±)15-HEPE	Cayman Chemicals
(±)18-HEPE	Cayman Chemicals
20-HEPE	Cayman Chemicals
(±)9(10)-EpOME MaxSpec®	Cayman Chemicals
(±)12(13)-EpOME MaxSpec®	Cayman Chemicals
9(S)-HOTrE	Cayman Chemicals
13(S)-HOTrE	Cayman Chemicals
8(9)-DiHETE	Cayman Chemicals
11(12)-DiHETE	Cayman Chemicals
(±)14(15)-DiHETE	Cayman Chemicals
(±)17(18)-DiHETE	Cayman Chemicals
(±)9(10)-DiHOME MaxSpec®	Cayman Chemicals
(±)12(13)-DiHOME MaxSpec®	Cayman Chemicals
9(S)-HODE MaxSpec®	Cayman Chemicals
(±)13-HODE MaxSpec®	Cayman Chemicals
9,10-Dihydroxystearic acid	Cayman Chemicals
*Cayman Chemicals	Ann Arbor, MI, USA
Internal Standard
Isotopically labeled internal standard	Vendor	Category	Concentration of standard working solution [ng/mL]	Volume of working solution [µL]	Volume of PBS [µL]	Concentration related to sample [ng/mL]
PGE2-d4	Cayman Chemicals	A	10	20	200	1
PGD2-d4	Cayman Chemicals	A	10	20	200	1
(±)9(10)-EpOME-d4	Cayman Chemicals	B	25	20	200	2.5
5S-HETE-d8	Cayman Chemicals	B	25	20	200	2.5
(±)9-HETE-d8	Cayman Chemicals	B	25	20	200	2.5
(±)11-HETE-d8	Cayman Chemicals	B	25	20	200	2.5
12(S)-HETE-d8	Cayman Chemicals	B	25	20	200	2.5
15S-HETE-d8	Cayman Chemicals	B	25	20	200	2.5
17-HDHA-d5	Cayman Chemicals	B	25	20	200	2.5
8,9-DiHETrE-d11	Cayman Chemicals	B	25	20	200	2.5
11,12-DiHETrE-d11	Cayman Chemicals	B	25	20	200	2.5
14,15-DiHETrE-d11	Cayman Chemicals	B	25	20	200	2.5
9,10-DiHOME-d4	Cayman Chemicals	B	25	20	200	2.5
12,13-DiHOME-d4	Cayman Chemicals	B	25	20	200	2.5
PGF2alpha-d4	Cayman Chemicals	B	25	20	200	2.5
TXB2-d4	Cayman Chemicals	B	25	20	200	2.5
LTB4-d4	Cayman Chemicals	C	40	20	200	4
12(13)-EpOME-d4	Cayman Chemicals	D	50	20	200	5
20-HETE-d6	Cayman Chemicals	D	50	20	200	5
9S-HODE-d4	Cayman Chemicals	D	50	20	200	5
13S-HODE-d4	Cayman Chemicals	D	50	20	200	5
6-keto-PGF1alpha-d4	Cayman Chemicals	D	50	20	200	5
15S-HEPE-d5	Cayman Chemicals	E	200	20	200	20
(±)5(6)-EpETrE-d11	Cayman Chemicals	F	250	20	200	25
(±)8(9)-EpETrE-d11	Cayman Chemicals	F	250	20	200	25
(±)11(12)-EpETrE-d11	Cayman Chemicals	F	250	20	200	25
(±)14(15)-EpETre-d11	Cayman Chemicals	F	250	20	200	25
*Cayman Chemicals	Ann Arbor, MI, USA
LC-MS/MS Instrumentation and Analysis
Instrumentation
HPLC:	Agilent 1290 Infinity II
MS:	Sciex QTRAP 6500+
Mode	ESI - negative electrospray ionization
Column	Acquity UPLC BEH C18 2.1 x 100 mm (Waters)
Pre-column	Aquity UPLC BEH C18 1.7 µm VanGuard pre-column 2.1 x 5 mm (Waters)
Sample preparation	SPE (Solid Phase Extraction)
	Extrahera No 414001 (Biotage)
	Extrahera Protocol	Pretreatment	Conditioning	Equilibration	Sample Load	Wash	Elution
	Number of steps	1	1	1	1	1	1
	pressure (bar)	0	0.4	0.4	0.3	0.3	0
	Solvent	1% formic acid solution	Methanol	0.1% formic acid solution		40:60 Methanol/Water	Acetonitrile
	Volume (µL)	600	1000	1000	1000	1000	1000
	Pressure time (s)	0	120	100	0	0	0
	Repeat (Number of times)	0	1	No	3	1	1
	Pressure Gradient	0	0.4 bar 120 s	0.4 bar 120 s (I) 0.6 bar 35 s (II)	0.3 bar 60s (I) 0.4 bar 90 s (III) 0.6 bar 30 s (IV)	0.3 bar 60 s (I) 0.8 bar 90 s (II)	0.2 bar 60 s (I) 0.3 bar (60 s) (II) 0.5 bar 75 s (III)
	Plate dry	No	No	No	No	Yes, 10 s	No
Analysis
Application	Analyst 1.7.1 - Multi Quant 3.0.3 (Sciex)
Method	Internal standard method (isotope diution mass spectrometry)
Calibration curve	linear regression
weighting	1/x
Acceptance criteria measurment
Procedure	acceptance criteria	accurancy
Standards	75% (6/8)	±15%
QC-Sets (LQC, MQC, HQC)	67% (2/3)	±15%
QC sample at each concentration	50% (1/2)
Oxylipins chromatogram
